# Supplementary material for: Protein Fragments: Functional and Structural Roles of Their Coevolution Networks
Source: PubMed Central journal article supplement (PMC3489791; doi:10.1371/journal.pone.0048124), 2012-11-05
Supplement: pone.0048124.s004.pdf [file pone.0048124.s004.pdf]

Supporting Information Text S2:  
comparison of coevolution analysis methods  
on aligned sets of sequences representing the  
MukB protein family

| Methods comparison - MukB on 200 sequences |     |    |                                                                                                                                                                                                                                     |     |
|--------------------------------------------|-----|----|-------------------------------------------------------------------------------------------------------------------------------------------------------------------------------------------------------------------------------------|-----|
| Method                                     | Al  | Cl | Positions                                                                                                                                                                                                                           | Sym |
| BIS, <i>pos</i> , $d = 0$                  | 200 | C1 | 4 6 9                                                                                                                                                                                                                               | 1   |
|                                            |     | C2 | 14 15 16 17 18 19 20 22 23 26                                                                                                                                                                                                       | 1   |
|                                            |     | C3 | <b>34 35 36 37 39 40 41 42</b>                                                                                                                                                                                                      | 1   |
| BIS, <i>pos</i> , $d = 1$                  | 200 | C1 | 44 45 52 53 54 57 58 60<br>61 62 63 64 65 66 67 72 73 74 76 77 79 80 81 84 86 87 94 95 99 108<br>112 113 115 116 121 175 179 182 189 193 194 198 200 202 203 204<br>205 206 207 208 209 210 213 216 217 218 220 221 222 223 225 227 | 1   |
|                                            |     | C2 | 98 174                                                                                                                                                                                                                              | 1   |
|                                            |     | C3 | 107 111 117 214 219                                                                                                                                                                                                                 | 1   |
|                                            |     | C4 | 119 125                                                                                                                                                                                                                             | 1   |
|                                            |     | C5 | 59 133                                                                                                                                                                                                                              | 1   |
|                                            |     | C6 | 49 145 170                                                                                                                                                                                                                          | 1   |
|                                            |     | C7 | 55 187                                                                                                                                                                                                                              | 1   |
|                                            |     | C8 | 29 30 31 32 33                                                                                                                                                                                                                      | 1   |
| BIS, <i>blocks</i> , $d = 0$               | 200 | C1 | 4 6 9                                                                                                                                                                                                                               | 1   |
|                                            |     | C2 | 14-20 22-23 26                                                                                                                                                                                                                      | 1   |
|                                            |     | C3 | <b>34-37 39-41-42</b>                                                                                                                                                                                                               | 1   |
| BIS, <i>blocks</i> , $d = 1$               | 200 | C1 | 57-67 133                                                                                                                                                                                                                           | 1   |
|                                            |     | C2 | 44-45 52-54 57-58 60-67 72-74 76-77 79-81 84 86-87 94-95 99 108<br>112-113 115-116 121 175 179 182 189<br>193-194 198 200 202-210 213 216-218 220-223 225 227                                                                       | 1   |
|                                            |     | C3 | 98-99 174-175                                                                                                                                                                                                                       | 1   |
|                                            |     | C4 | 107-108 111-113 115-117 213-214 216-223                                                                                                                                                                                             | 1   |
|                                            |     | C5 | 119 125                                                                                                                                                                                                                             | 1   |
|                                            |     | C6 | 49 145 170                                                                                                                                                                                                                          | 1   |
|                                            |     | C7 | 52-55 187                                                                                                                                                                                                                           | 1   |
|                                            |     | C8 | 29 30 31 32 33                                                                                                                                                                                                                      | 1   |
| ELSC                                       | 200 | C1 | <b>107 111</b>                                                                                                                                                                                                                      | 0.8 |
|                                            |     | C2 | <b>214 219</b>                                                                                                                                                                                                                      | 0.8 |
|                                            |     | C3 | 44 45 52 53 54 57 58 77 79 80 81 84 86 87 94 95 99 108 112 113<br>115 116 121 175 179 182 189 193 194 198 200 202 203 204 205<br><b>206 207 208 209 210 213 216 217 218 220 221 222 223 225</b>                                     | 0.5 |
|                                            |     | C4 | 4 6 9                                                                                                                                                                                                                               | 0.5 |
|                                            |     | C5 | <b>29 30 31 32 33 34 35 36 37 39 40 41 42</b>                                                                                                                                                                                       | 0.5 |
|                                            |     | C6 | 14 15 16 17 18 19 20 22 23 26                                                                                                                                                                                                       | 0.5 |

Table 1: **MukB protein: comparing methodologies run over 200 sequences. Part 1.**

For each method, we report the clusters of co-evolving residues detected by the clustering algorithm CLAG (with environmental score equal 1, symmetric score  $> 0$  and  $\Delta = 0.05$ ). For BIS we selected clusters with symmetric score = 1 only. For each methodology we report the number of sequences (Al), the names of the clusters (Cl), the positions on the PDB structure (Positions). Results are reported for BIS run on blocks and on single alignment positions. SCA, ELSC, MI, MST and CTMP methods are compared to BIS execution when considering alignment positions (*pos*). Common residues predicted by both methodologies are highlighted in bold. Green residues are those belonging to the Walker-A. NO MATRIX means that the method did not output any co-evolution pair; NO CLUSTERS means that the method output co-evolution pairs that could not be clustered together.

| Methods comparison - MukB on 200 sequences |     |           |                                                                                                                                                                                                   |     |
|--------------------------------------------|-----|-----------|---------------------------------------------------------------------------------------------------------------------------------------------------------------------------------------------------|-----|
| Method                                     | Al  | Cl        | Positions                                                                                                                                                                                         | Sym |
| SCA-DB                                     | 200 | C1        | <b>119 125</b>                                                                                                                                                                                    | 0.9 |
|                                            |     | C2        | <b>98 174</b>                                                                                                                                                                                     | 0.9 |
|                                            |     | C3        | <b>107 111 117 214 219</b>                                                                                                                                                                        | 0.9 |
|                                            |     | C4        | <b>49 145 170</b>                                                                                                                                                                                 | 0.9 |
|                                            |     | C5        | <b>55 187</b>                                                                                                                                                                                     | 0.9 |
|                                            |     | C6        | 103 224                                                                                                                                                                                           | 0.9 |
|                                            |     | C7        | 47 90 154 196                                                                                                                                                                                     | 0.8 |
|                                            |     | C8        | 188 211                                                                                                                                                                                           | 0.8 |
|                                            |     | C9        | <b>34 35 36 37 39 40 41 42</b>                                                                                                                                                                    | 0.3 |
|                                            |     | C10       | <b>44 45 52 53 54 57 58 77 79 80 81 84 86 87 94 95 99 108 112 113<br/>115 116 121 175 179 182 189 193 194 198 200 202 203 204 205<br/>206 207 208 209 210 213 216 217 218 220 221 222 223 225</b> | 0.3 |
|                                            |     | C11       | <b>29 30 31 32 33</b>                                                                                                                                                                             | 0.3 |
|                                            |     | C12       | <b>14 15 16 17 18 19 20 22 23 26</b>                                                                                                                                                              | 0.3 |
|                                            |     | C13       | <b>4 6 9</b>                                                                                                                                                                                      | 0.3 |
| SCA-TM                                     | 200 | C1        | <b>55 187</b>                                                                                                                                                                                     | 0.9 |
|                                            |     | C2        | <b>98 174</b>                                                                                                                                                                                     | 0.8 |
|                                            |     | C3        | <b>107 111 117 214 219</b>                                                                                                                                                                        | 0.8 |
|                                            |     | C4        | <b>49 145 170</b>                                                                                                                                                                                 | 0.8 |
|                                            |     | C5        | <b>119 125</b>                                                                                                                                                                                    | 0.8 |
|                                            |     | C6        | 47 90 154 196                                                                                                                                                                                     | 0.7 |
|                                            |     | C7        | 188 211                                                                                                                                                                                           | 0.7 |
|                                            |     | C8        | <b>44 45 52 53 54 57 58 77 79 80 81 84 86 87 94 95 99 108 112 113<br/>115 116 121 175 179 182 189 193 194 198 200 202 203 204 205<br/>206 207 208 209 210 213 216 217 218 220 221 222 223 225</b> | 0.2 |
|                                            |     | C9        | <b>14 15 16 17 18 19 20 22 23 26</b>                                                                                                                                                              | 0.2 |
|                                            |     | C10       | <b>4 6 9</b>                                                                                                                                                                                      | 0.2 |
|                                            |     | C11       | <b>34 35 36 37 39 40 41 42</b>                                                                                                                                                                    | 0.2 |
|                                            |     | C12       | <b>29 30 31 32 33</b>                                                                                                                                                                             | 0.2 |
| MI                                         | 200 | C1        | 122 128 141                                                                                                                                                                                       | 1   |
|                                            |     | C2        | 128 141                                                                                                                                                                                           | 1   |
|                                            |     | C3        | 122 141                                                                                                                                                                                           | 1   |
|                                            |     | C4        | <b>55 187</b>                                                                                                                                                                                     | 0.9 |
|                                            |     | C5        | <b>119 125</b>                                                                                                                                                                                    | 0.8 |
|                                            |     | C6        | 47 90 154 196                                                                                                                                                                                     | 0.7 |
|                                            |     | C7        | 188 211                                                                                                                                                                                           | 0.7 |
|                                            |     | C8        | <b>98 174</b>                                                                                                                                                                                     | 0.7 |
|                                            |     | C9        | <b>49 145 170</b>                                                                                                                                                                                 | 0.7 |
|                                            |     | C10       | <b>107 111 117 214 219</b>                                                                                                                                                                        | 0.7 |
| MST                                        | 200 | NO MATRIX |                                                                                                                                                                                                   |     |
| CTMP                                       | 200 | NO MATRIX |                                                                                                                                                                                                   |     |

Table 2: **MukB protein: comparing methodologies run over 200 sequences. Part 2.**  
See legend of Table 2-Text S2.

| Methods comparison - MukB on 49 sequences |    |    |                                                                                                                                                                                                                                         |     |
|-------------------------------------------|----|----|-----------------------------------------------------------------------------------------------------------------------------------------------------------------------------------------------------------------------------------------|-----|
| Method                                    | Al | Cl | Positions                                                                                                                                                                                                                               | Sym |
| BIS, <i>pos</i> , $d = 0$                 | 49 | C1 | 4 6 9                                                                                                                                                                                                                                   | 1   |
|                                           |    | C2 | 14 15 16 17 18 19 20 22 23 26                                                                                                                                                                                                           | 1   |
|                                           |    | C3 | 36 37 39 40 41 42                                                                                                                                                                                                                       | 1   |
| BIS, <i>pos</i> , $d = 1$                 | 49 | C1 | 44 45 52 53 54 57 58 60 61 62 63 64 65 66 67 72 73 74 76 77 79<br>80 81 84 86 87 94 95 99 106 108 112 113 115 116 121 175 179<br>182 189 193 194 198 200 202 203 204 205 206 207 208 209 210<br>213 216 217 218 220 221 222 223 225 227 | 1   |
|                                           |    | C2 | 98 174                                                                                                                                                                                                                                  | 1   |
|                                           |    | C3 | 107 111 117 214 219                                                                                                                                                                                                                     | 1   |
|                                           |    | C4 | 119 125                                                                                                                                                                                                                                 | 1   |
|                                           |    | C5 | 59 133                                                                                                                                                                                                                                  | 1   |
|                                           |    | C6 | 55 187                                                                                                                                                                                                                                  | 1   |
|                                           |    | C7 | 29 30 31 32 33                                                                                                                                                                                                                          | 1   |
| BIS, <i>blocks</i> , $d = 0$              | 49 | C1 | 4 6 9                                                                                                                                                                                                                                   | 1   |
|                                           |    | C2 | 14-20 22-23 26                                                                                                                                                                                                                          | 1   |
|                                           |    | C3 | 36-37 39-41-42                                                                                                                                                                                                                          | 1   |
| BIS, <i>blocks</i> , $d = 1$              | 49 | C1 | 57-67 133                                                                                                                                                                                                                               | 1   |
|                                           |    | C2 | 44-45 52-54 57-58 60-67 72-74 76-77 79-81 84 86-87 94-95 99<br>106 108 112-113 115-116 121 175 179 182 189<br>193-194 198 200 202-210 213 216-218 220-223 225 227                                                                       | 1   |
|                                           |    | C3 | 98-99 174-175                                                                                                                                                                                                                           | 1   |
|                                           |    | C4 | 106-108 111-113 115-117 213-214 216-223                                                                                                                                                                                                 | 1   |
|                                           |    | C5 | 119 125                                                                                                                                                                                                                                 | 1   |
|                                           |    | C6 | 52-55 187                                                                                                                                                                                                                               | 1   |
|                                           |    | C7 | 29 30 31 32 33                                                                                                                                                                                                                          | 1   |
| ELSC                                      | 49 | C1 | 107 111                                                                                                                                                                                                                                 | 0.9 |
|                                           |    | C2 | 214 219                                                                                                                                                                                                                                 | 0.9 |
|                                           |    | C3 | 44 45 52 53 54 57 58 77 79 80 81 84 86 87 94 95 99 106 108 112<br>113 115 116 121 175 179 182 189 193 194 198 200 202 203 204<br>205 206 207 208 209 210 213 216 217 218 220 221 222 223 225                                            | 0.6 |
|                                           |    | C4 | 14 15 16 17 18 19 20 22 23 26                                                                                                                                                                                                           | 0.6 |
|                                           |    | C5 | 4 6 9                                                                                                                                                                                                                                   | 0.6 |
|                                           |    | C6 | 29 30 31 32 33 34 35 36 37 39 40 41 42                                                                                                                                                                                                  | 0.6 |

Table 3: MukB protein: comparing methodologies run over 49 sequences. Part 1.  
See legend of Table 2-Text S2.

| Methods comparison - MukB on 49 sequences |    |             |                                                                                                                                                                                                                   |     |
|-------------------------------------------|----|-------------|-------------------------------------------------------------------------------------------------------------------------------------------------------------------------------------------------------------------|-----|
| Method                                    | Al | Cl          | Positions                                                                                                                                                                                                         | Sym |
| SCA-DB                                    | 49 | C1          | <b>119 125</b>                                                                                                                                                                                                    | 0.9 |
|                                           |    | C2          | <b>107 111 117 214 219</b>                                                                                                                                                                                        | 0.9 |
|                                           |    | C3          | 47 90 154 196                                                                                                                                                                                                     | 0.9 |
|                                           |    | C4          | <b>98 174</b>                                                                                                                                                                                                     | 0.9 |
|                                           |    | C5          | 188 211                                                                                                                                                                                                           | 0.9 |
|                                           |    | C6          | 49 145 170                                                                                                                                                                                                        | 0.9 |
|                                           |    | C7          | 132 <b>133</b>                                                                                                                                                                                                    | 0.9 |
|                                           |    | C8          | <b>44 45 52 53 54 57 58 77 79 80 81 84 86 87 94 95 99 106 108</b><br><b>112 113 115 116 121 175 179 182 189 193 194 198 200 202 203</b><br><b>204 205 206 207 208 209 210 213 216 217 218 220 221 222 223 225</b> | 0.3 |
|                                           |    | C9          | <b>4 6 9</b>                                                                                                                                                                                                      | 0.3 |
|                                           |    | C10         | <b>34 35 36 37 39 40 41 42</b>                                                                                                                                                                                    | 0.3 |
|                                           |    | C11         | <b>29 30 31 32 33</b>                                                                                                                                                                                             | 0.3 |
|                                           |    | C12         | <b>14 15 16 17 18 19 20 22 23 26</b>                                                                                                                                                                              | 0.3 |
| SCA-TM                                    | 49 | C1          | 154 196                                                                                                                                                                                                           | 0.9 |
|                                           |    | C2          | 47 90                                                                                                                                                                                                             | 0.9 |
|                                           |    | C3          | 188 211                                                                                                                                                                                                           | 0.9 |
|                                           |    | C4          | 49 145 170                                                                                                                                                                                                        | 0.9 |
|                                           |    | C5          | <b>98 174</b>                                                                                                                                                                                                     | 0.9 |
|                                           |    | C6          | <b>107 117 219</b>                                                                                                                                                                                                | 0.9 |
|                                           |    | C7          | <b>111 214</b>                                                                                                                                                                                                    | 0.9 |
|                                           |    | C8          | 132 <b>133</b>                                                                                                                                                                                                    | 0.9 |
|                                           |    | C9          | <b>44 45 52 53 54 57 58 77 79 80 81 84 86 87 94 95 99 106 108</b><br><b>112 113 115 116 121 175 179 182 189 193 194 198 200 202 203</b><br><b>204 205 206 207 208 209 210 213 216 217 218 220 221 222 223 225</b> | 0.2 |
|                                           |    | C10         | <b>34 35 36 37 39 40 41 42</b>                                                                                                                                                                                    | 0.2 |
|                                           |    | C11         | <b>4 6 9</b>                                                                                                                                                                                                      | 0.2 |
|                                           |    | C12         | <b>29 30 31 32 33</b>                                                                                                                                                                                             | 0.2 |
|                                           |    | C13         | <b>14 15 16 17 18 19 20 22 23 26</b>                                                                                                                                                                              | 0.2 |
| MI                                        | 49 | C1          | 105 137                                                                                                                                                                                                           | 0.9 |
|                                           |    | C2          | <b>55 187</b>                                                                                                                                                                                                     | 0.9 |
|                                           |    | C3          | <b>98 174</b>                                                                                                                                                                                                     | 0.8 |
|                                           |    | C4          | <b>107 111 117 214 219</b>                                                                                                                                                                                        | 0.8 |
|                                           |    | C5          | 47 90 154 196                                                                                                                                                                                                     | 0.7 |
|                                           |    | C6          | 188 211                                                                                                                                                                                                           | 0.7 |
|                                           |    | C7          | 49 145 170                                                                                                                                                                                                        | 0.7 |
| MST                                       | 49 | NO MATRIX   |                                                                                                                                                                                                                   |     |
| CTMP                                      | 49 | NO CLUSTERS |                                                                                                                                                                                                                   |     |

Table 4: MukB protein: comparing methodologies run over 49 sequences. Part 2.  
See legend of Table 2-Text S2.

| Methods comparison - MukB on 205 sequences |     |     |                                             |     |
|--------------------------------------------|-----|-----|---------------------------------------------|-----|
| Method                                     | Al  | Cl  | Positions                                   | Sym |
| BIS, <i>pos</i> , $d = 0$                  | 205 | C1  | 16 20 22                                    | 1   |
|                                            |     | C2  | 36 37 39 40                                 | 1   |
| BIS, <i>pos</i> , $d = 1$                  | 205 | C1  | 45 61 64 66 77 200 202 203                  | 1   |
|                                            |     | C2  | 44 60 62 76 84 204 210 222                  | 1   |
|                                            |     | C3  | 54 74 81 99 179 182 207 217 221             | 1   |
|                                            |     | C4  | 80 205                                      | 1   |
|                                            |     | C5  | 52 193 220                                  | 1   |
|                                            |     | C6  | 31 33                                       | 1   |
| BIS, <i>blocks</i> , $d = 0$               | 205 | C1  | 16-17 20 22                                 | 1   |
|                                            |     | C2  | 36-37 39-40                                 | 1   |
| BIS, <i>blocks</i> , $d = 1$               | 205 | C1  | 44 60 62 76 84 204 210 221-222              | 1   |
|                                            |     | C2  | 44-45 60-62 64 66 76-77 200 202-205         | 1   |
|                                            |     | C3  | 54 74 81 99 179 182 207 217 221             | 1   |
|                                            |     | C4  | 80-81 205                                   | 1   |
|                                            |     | C5  | 52 193 220-221                              | 1   |
|                                            |     | C6  | 31 33                                       | 1   |
| ELSC                                       | 205 | C1  | 200 202 203                                 | 0.9 |
|                                            |     | C2  | 31 33                                       | 0.9 |
|                                            |     | C3  | 204 210                                     | 0.8 |
|                                            |     | C4  | 208 209                                     | 0.8 |
|                                            |     | C5  | 15 19 26                                    | 0.8 |
|                                            |     | C6  | 16 20 22                                    | 0.7 |
|                                            |     | C7  | 32 34 36 37 39 40                           | 0.2 |
|                                            |     | C8  | 54 81 99 179 182 207 217 221                | 0.2 |
| SCA-DB                                     | 205 | C1  | 45 57 77 94 113 175 189 198 202 203 206 216 | 0.9 |
|                                            |     | C2  | 113 175 189 198                             | 0.9 |
|                                            |     | C3  | 94 113 189 206                              | 0.9 |
|                                            |     | C4  | 45 94 113 189 202 203 206 216               | 0.9 |
|                                            |     | C5  | 45 94 113 189 202 203 216                   | 0.9 |
|                                            |     | C6  | 45 77 94 113 189 202 203 216                | 0.9 |
|                                            |     | C7  | 80 205 223                                  | 0.9 |
|                                            |     | C8  | 31 33                                       | 0.9 |
|                                            |     | C9  | 77 113 189 202 216                          | 0.9 |
|                                            |     | C10 | 57 113 189                                  | 0.9 |
|                                            |     | C11 | 19 26                                       | 0.8 |
|                                            |     | C12 | 209 218                                     | 0.8 |
|                                            |     | C13 | 208 209 218                                 | 0.8 |
|                                            |     | C14 | 208 218                                     | 0.8 |
|                                            |     | C15 | 79 84 204 210 222                           | 0.8 |
|                                            |     | C16 | 45 57 77 202 203 216                        | 0.8 |
|                                            |     | C17 | 57 202                                      | 0.8 |
|                                            |     | C18 | 57 216                                      | 0.8 |
|                                            |     | C19 | 45 57 77 203                                | 0.8 |
|                                            |     | C20 | 45 57 77                                    | 0.8 |
|                                            |     | C21 | 57 77 203                                   | 0.8 |
|                                            |     | C22 | 52 193 220                                  | 0.8 |
|                                            |     | C23 | 16 20 22                                    | 0.6 |
|                                            |     | C24 | 53 121                                      | 0.6 |
| SCA-TM                                     | 205 | C1  | 113 189 202                                 | 0.8 |
|                                            |     | C2  | 108 113 202                                 | 0.8 |
|                                            |     | C3  | 108 113                                     | 0.8 |
|                                            |     | C4  | 175 189 202                                 | 0.8 |
|                                            |     | C5  | 94 175 189                                  | 0.8 |
|                                            |     | C6  | 94 175                                      | 0.8 |
|                                            |     | C7  | 44 79 84 204 210                            | 0.7 |
|                                            |     | C8  | 45 77                                       | 0.7 |
|                                            |     | C9  | 57 200 203                                  | 0.7 |
|                                            |     | C10 | 20 22                                       | 0.5 |

Table 5: MukB protein: comparing methodologies run over 205 sequences. Part 1.  
See legend of Table 2-Text S2. Continued in Table 6-Text S2.

| Methods comparison - MukB on 205 sequences |     |           |                                           |     |
|--------------------------------------------|-----|-----------|-------------------------------------------|-----|
| Method                                     | Al  | Cl        | Positions                                 | Sym |
| MI                                         | 205 | C1        | 35 223                                    | 0.8 |
|                                            |     | C2        | 18 108                                    | 0.7 |
|                                            |     | C3        | 189 198                                   | 0.7 |
|                                            |     | C4        | 57 94 113 175 216                         | 0.7 |
|                                            |     | C5        | 11 23 31 33 45 77 200 202 203             | 0.7 |
|                                            |     | C6        | 41 80 205                                 | 0.7 |
|                                            |     | C7        | 15 19                                     | 0.7 |
|                                            |     | C8        | 44 84 204 210 222                         | 0.6 |
|                                            |     | C9        | 52 193 220                                | 0.6 |
|                                            |     | C10       | 208 209 218                               | 0.6 |
|                                            |     | C11       | 42 194                                    | 0.5 |
|                                            |     | C12       | 9 16 20 22 115 213                        | 0.5 |
|                                            |     | C13       | 53 121                                    | 0.2 |
| MST                                        | 205 | C1        | 31 32                                     | 1   |
|                                            |     | C2        | 189 198                                   | 1   |
|                                            |     | C3        | 80 205                                    | 1   |
|                                            |     | C4        | 53 121                                    | 1   |
|                                            |     | C5        | 45 61 64 66 77 200 201 203                | 1   |
|                                            |     | C6        | 10 16 22                                  | 1   |
|                                            |     | C7        | 36 37 39 40                               | 1   |
|                                            |     | C8        | 32 34                                     | 1   |
|                                            |     | C9        | 54 74 81 99 179 182 207 217 221           | 1   |
|                                            |     | C10       | 52 193 220                                | 1   |
|                                            |     | C11       | 44 60 62 67 76 84 204 208 209 210 211 218 | 1   |
| CTMP                                       | 205 | NO MATRIX |                                           |     |

Table 6: MukB protein: comparing methodologies run over 205 sequences. Part 2.  
Table 5-Text S2 continued.

| Methods comparison - MukB on 54 sequences |    |     |                                                                |     |
|-------------------------------------------|----|-----|----------------------------------------------------------------|-----|
| Method                                    | Al | Cl  | Positions                                                      | Sym |
| BIS, <i>pos</i> , $d = 0$                 | 54 | C1  | 16 20 22                                                       | 1   |
|                                           |    | C2  | 36 37 39 40                                                    | 1   |
| BIS, <i>pos</i> , $d = 1$                 | 54 | C1  | 45 61 64 66 77 200 202 203                                     | 1   |
|                                           |    | C2  | 44 60 62 76 84 204 210 222                                     | 1   |
|                                           |    | C3  | 54 74 81 99 179 182 207 217 221                                | 1   |
|                                           |    | C4  | 80 205                                                         | 1   |
|                                           |    | C5  | 52 193 220                                                     | 1   |
|                                           |    | C6  | 31 33                                                          | 1   |
| BIS, <i>blocks</i> , $d = 0$              | 54 | C1  | 16-17 20 22                                                    | 1   |
|                                           |    | C2  | 36-37 39-40                                                    | 1   |
| BIS, <i>blocks</i> , $d = 1$              | 54 | C1  | 44 60 62 76 84 204 210 221-222                                 | 1   |
|                                           |    | C2  | 44-45 60-62 64 66 76-77 200 202-205                            | 1   |
|                                           |    | C3  | 54 74 81 99 179 182 207 217 221                                | 1   |
|                                           |    | C4  | 80-81 205                                                      | 1   |
|                                           |    | C5  | 52 193 220-221                                                 | 1   |
|                                           |    | C6  | 31 33                                                          | 1   |
| ELSC                                      | 54 | C1  | 15 19                                                          | 0.9 |
|                                           |    | C2  | 31 33                                                          | 0.9 |
|                                           |    | C3  | 200 202 203                                                    | 0.9 |
|                                           |    | C4  | 208 209                                                        | 0.9 |
|                                           |    | C5  | 20 22                                                          | 0.8 |
| SCA-DB                                    | 54 | C1  | 117 219                                                        | 0.9 |
|                                           |    | C2  | 45 57 77 80 94 108 113 175 189 198 200 202 203 205 206 216 223 | 0.9 |
|                                           |    | C3  | 86 225                                                         | 0.9 |
|                                           |    | C4  | 18 23                                                          | 0.9 |
|                                           |    | C5  | 31 33                                                          | 0.9 |
|                                           |    | C6  | 44 79 84 204 208 209 210 218                                   | 0.9 |
|                                           |    | C7  | 44 79 84 106 204 208 209 210 218                               | 0.9 |
|                                           |    | C8  | 44 58 79 84 106 204 208 209 210 218                            | 0.9 |
|                                           |    | C9  | 79 84 106 204 208 209 210 218                                  | 0.9 |
|                                           |    | C10 | 19 26                                                          | 0.9 |
|                                           |    | C11 | 15 19 26                                                       | 0.9 |
|                                           |    | C12 | 58 209 218                                                     | 0.9 |
|                                           |    | C13 | 15 19                                                          | 0.9 |
|                                           |    | C14 | 52 193 220                                                     | 0.9 |
|                                           |    | C15 | 16 20 22                                                       | 0.8 |
|                                           |    | C16 | 58 79 84 106 204 208 209 210 218 222                           | 0.8 |
|                                           |    | C17 | 58 79 84 106 204 208 210 222                                   | 0.8 |
|                                           |    | C18 | 58 204 222                                                     | 0.8 |
|                                           |    | C19 | 218 222                                                        | 0.8 |
|                                           |    | C20 | 209 222                                                        | 0.8 |
|                                           |    | C21 | 58 210 222                                                     | 0.8 |
|                                           |    | C22 | 58 208 222                                                     | 0.8 |
|                                           |    | C23 | 58 84 222                                                      | 0.8 |
|                                           |    | C24 | 58 79 222                                                      | 0.8 |
|                                           |    | C25 | 58 106 222                                                     | 0.8 |

Table 7: MukB protein: comparing methodologies run over 54 sequences. Part 1.  
See legend of Table 2-Text S2. Continued in Table 8-Text S2.



| Methods comparison - MukB on 54 sequences |             |     |                                                       |      |
|-------------------------------------------|-------------|-----|-------------------------------------------------------|------|
| Method                                    | Al          | Cl  | Positions                                             | Sym  |
| SCA-TM                                    | 54          | C1  | 117 219                                               | 0.9  |
|                                           |             | C2  | 86 225                                                | 0.9  |
|                                           |             | C3  | <b>80 94 108 113 175 189 202</b>                      | 0.9  |
|                                           |             | C4  | <b>80 94 108 113 175 189 198 202 223</b>              | 0.9  |
|                                           |             | C5  | <b>80 94 108 113 175 189</b>                          | 0.9  |
|                                           |             | C6  | <b>80 94 108 113 175 189 198 206 223</b>              | 0.9  |
|                                           |             | C7  | <b>80 94 108 113 202</b>                              | 0.9  |
|                                           |             | C8  | 94 108 175 198 216 223                                | 0.9  |
|                                           |             | C9  | 175 206                                               | 0.9  |
|                                           |             | C10 | 198 216 223                                           | 0.9  |
|                                           |             | C11 | <b>45 77 200 203 205</b>                              | 0.9  |
|                                           |             | C12 | <b>45 77 205</b>                                      | 0.9  |
|                                           |             | C13 | <b>200 203 205</b>                                    | 0.9  |
|                                           |             | C14 | 18 23                                                 | 0.9  |
|                                           |             | C15 | 58 79 <b>84</b> 106 <b>204</b> 208 209 <b>210 222</b> | 0.8  |
|                                           |             | C16 | 58 106 209 <b>222</b>                                 | 0.8  |
|                                           |             | C17 | <b>16 22</b>                                          | 0.8  |
|                                           |             | C18 | <b>44 204 208 210</b>                                 | 0.8  |
|                                           |             | C19 | <b>44 79 84 204 208 209 210</b>                       | 0.8  |
|                                           |             | C20 | <b>79 84 204 208 209 210</b>                          | 0.8  |
| MI                                        | 54          | C1  | 18 108                                                | 0.9  |
|                                           |             | C2  | 189 198                                               | 0.9  |
|                                           |             | C3  | 57 94 113 216                                         | 0.9  |
|                                           |             | C4  | <b>35 223</b>                                         | 0.9  |
|                                           |             | C5  | 11 <b>45 77 200 202 203</b>                           | 0.9  |
|                                           |             | C6  | 11 <b>45</b>                                          | 0.9  |
|                                           |             | C7  | 11 <b>77</b>                                          | 0.9  |
|                                           |             | C8  | 11 <b>200</b>                                         | 0.9  |
|                                           |             | C9  | 11 <b>202</b>                                         | 0.9  |
|                                           |             | C10 | 11 <b>203</b>                                         | 0.9  |
|                                           |             | C11 | 11 23 <b>31 33 45 77 200 202 203</b>                  | 0.8  |
|                                           |             | C12 | 23 <b>31 33 45 77 200 202 203</b>                     | 0.8  |
|                                           |             | C13 | 11 23 <b>31 33</b>                                    | 0.8  |
|                                           |             | C14 | 41 <b>80 205</b>                                      | 0.8  |
|                                           |             | C15 | 15 19 79                                              | 0.7  |
|                                           |             | C16 | 106 208 209 218                                       | 0.7  |
|                                           |             | C17 | <b>52 193 220</b>                                     | 0.6  |
|                                           |             | C18 | <b>44 84 204 210 222</b>                              | 0.6  |
|                                           |             | C19 | 9 <b>16 20 22 213</b>                                 | 0.5  |
|                                           |             | C20 | 9 <b>16</b>                                           | 0.5  |
|                                           |             | C21 | 9 <b>20</b>                                           | 0.5  |
|                                           |             | C22 | 9 <b>22</b>                                           | 0.5  |
|                                           |             | C23 | 9 213                                                 | 0.5  |
|                                           |             | C24 | 42 194                                                | 0.4  |
|                                           |             | C25 | <b>16 20 22 213</b>                                   | 0.4  |
|                                           |             | C26 | 53 121                                                | 0.1  |
| MST                                       | 54          | C1  | <b>31 32</b>                                          | 0.90 |
|                                           |             | C2  | 63 206                                                | 0.90 |
|                                           |             | C3  | <b>80 205</b>                                         | 0.90 |
|                                           |             | C4  | <b>44 60 62 76 84 204 210 222</b>                     | 0.90 |
|                                           |             | C5  | <b>45 61 64 66 77 200 202 203</b>                     | 0.90 |
|                                           |             | C6  | <b>36 38 39 40</b>                                    | 0.90 |
|                                           |             | C7  | <b>32 34</b>                                          | 0.90 |
|                                           |             | C8  | <b>54 74 81 99 179 182 207 217 221</b>                | 0.90 |
| CTMP                                      | NO CLUSTERS |     |                                                       |      |

Table 8: MukB protein: comparing methodologies run over 54 sequences. Part 2.

Table 7-Text S2 continued.
