# Supplementary material for: Protein Fragments: Functional and Structural Roles of Their Coevolution Networks
Source: PubMed Central journal article supplement (PMC3489791; doi:10.1371/journal.pone.0048124), 2012-11-05
Supplement: pone.0048124.s006.pdf [file pone.0048124.s006.pdf]

Supporting Information Text S4:  
comparison of coevolution analysis methods  
on aligned sets of sequences representing the  
Protein A - B domain protein family

| Methods comparison - Protein A-B domain on 452 sequences |                                                     |             |                                                                       |      |      |     |
|----------------------------------------------------------|-----------------------------------------------------|-------------|-----------------------------------------------------------------------|------|------|-----|
| Method                                                   | Al                                                  | Cl          | Positions                                                             | Sym  |      |     |
| BIS, <i>pos</i> , $d = 0$                                | 452                                                 | C1          | <b>22 23 27 29</b>                                                    | 1    |      |     |
|                                                          |                                                     | C2          | <b>30 31 32 33 34 35 36 37 38 39 40 42 46 48 49</b>                   | 1    |      |     |
|                                                          |                                                     | C3          | <b>41 44</b>                                                          | 1    |      |     |
|                                                          |                                                     | C4          | <b>51 52</b>                                                          | 1    |      |     |
| BIS, <i>pos</i> , $d = 1$                                | 452                                                 | C1          | <b>11 13 14 15 18</b>                                                 | 1    |      |     |
|                                                          |                                                     | C2          | <b>16 17</b>                                                          | 1    |      |     |
| BIS, <i>blocks</i> , $d = 0$                             | 452                                                 | C1          | <b>22-23 27 29</b>                                                    | 1    |      |     |
|                                                          |                                                     | C2          | <b>29-40 42 46 48-49</b>                                              | 1    |      |     |
|                                                          |                                                     | C3          | <b>29-42 44</b>                                                       | 1    |      |     |
|                                                          |                                                     | C4          | <b>51 52</b>                                                          | 1    |      |     |
| BIS, <i>blocks</i> , $d = 1$                             | 452                                                 | C5          | <b>16 17</b>                                                          | 1    |      |     |
|                                                          |                                                     | C6          | <b>11 13-15 18</b>                                                    | 1    |      |     |
| ELSC                                                     | 452                                                 | S1          | <b>16 17</b>                                                          | 0.90 |      |     |
|                                                          |                                                     | S2          | 6 8                                                                   | 0.90 |      |     |
|                                                          |                                                     | S3          | 19 20                                                                 | 0.81 |      |     |
|                                                          |                                                     | S4          | 20 24                                                                 | 0.72 |      |     |
|                                                          |                                                     | S5          | 19 20 24                                                              | 0.72 |      |     |
|                                                          |                                                     | S6          | 19 24                                                                 | 0.72 |      |     |
|                                                          |                                                     | S7          | <b>11 13 14 15 18</b>                                                 | 0.36 |      |     |
|                                                          |                                                     | S8          | <b>22 23 27 29 30 31 32 33 34 35 36 37 38 39 40 42 46 48 49 51 52</b> | 0.36 |      |     |
| SCA-DB                                                   | 452                                                 | S1          | 19 20                                                                 | 0.9  |      |     |
|                                                          |                                                     | S3          | 4 6 7                                                                 | 0.9  |      |     |
|                                                          |                                                     | S4          | 4 6 7 <b>17</b>                                                       | 0.9  |      |     |
|                                                          |                                                     | S5          | 4 16 <b>17</b>                                                        | 0.9  |      |     |
|                                                          |                                                     | S6          | <b>16 17</b>                                                          | 0.9  |      |     |
|                                                          |                                                     | S8          | <b>41 44</b>                                                          | 0.9  |      |     |
|                                                          |                                                     | S9          | 3 9                                                                   | 0.9  |      |     |
|                                                          |                                                     | S10         | 16 50                                                                 | 0.8  |      |     |
|                                                          |                                                     | S11         | <b>30 31 32 33 34 35 36 37 38 39 40 42 46 48 49</b>                   | 0.1  |      |     |
|                                                          |                                                     | S12         | <b>51 52</b>                                                          | 0.1  |      |     |
|                                                          |                                                     | SCA-TM      | 452                                                                   | S1   | 3 9  | 1   |
|                                                          |                                                     |             |                                                                       | S2   | 6 50 | 0.9 |
| S3                                                       | 20 60                                               |             |                                                                       | 0.9  |      |     |
| S4                                                       | <b>41 44</b>                                        |             |                                                                       | 0.9  |      |     |
| S5                                                       | 4 7                                                 |             |                                                                       | 0.9  |      |     |
| S6                                                       | 4 7 <b>16</b>                                       |             |                                                                       | 0.9  |      |     |
| S7                                                       | 7 16                                                |             |                                                                       | 0.9  |      |     |
| S8                                                       | <b>30 31 32 33 34 35 36 37 38 39 40 42 46 48 49</b> |             |                                                                       | 0    |      |     |
| S9                                                       | <b>51 52</b>                                        |             |                                                                       | 0    |      |     |
| MI                                                       | 452                                                 | S1          | 6 7 8                                                                 | 1    |      |     |
|                                                          |                                                     | S2          | 21 <b>30 33 34 38 46 49</b>                                           | 0.61 |      |     |
|                                                          |                                                     | S3          | <b>36 23</b>                                                          | 0.42 |      |     |
|                                                          |                                                     | S4          | <b>27 35</b>                                                          | 0.42 |      |     |
| MST                                                      | 452                                                 | S1          | <b>22 23 27 29</b>                                                    | 1    |      |     |
|                                                          |                                                     | S2          | <b>16 17</b>                                                          | 1    |      |     |
|                                                          |                                                     | S3          | <b>11 13 14 15 18</b>                                                 | 1    |      |     |
|                                                          |                                                     | S4          | 7 25                                                                  | 0.82 |      |     |
|                                                          |                                                     | S5          | 6 8 10                                                                | 0.82 |      |     |
|                                                          |                                                     | S6          | 6 8                                                                   | 0.82 |      |     |
|                                                          |                                                     | S7          | 6 4                                                                   | 0.82 |      |     |
| CTMP                                                     | 452                                                 | NO CLUSTERS |                                                                       |      |      |     |

Table 1: **Protein A-B domain: comparing methodologies run over 452 sequences.**

For each method, we report the clusters of co-evolving residues detected by the clustering algorithm CLAG (with environmental score equal 1, symmetric score  $> 0$  and  $\Delta = 0.05$ ). For BIS we selected clusters with symmetric score = 1 only. For each methodology we report the number of sequences (Al), the names of the clusters (Cl), the positions on the PDB structure (Positions). Results are reported for BIS run on blocks and on single alignment positions (*pos*). SCA, ELSC, MI, MST and CTMP methods are compared to BIS execution when considering alignment positions (*pos*). Common residues predicted by both methodologies are highlighted in bold. Green residues are those belonging to the Walker-A. NO MATRIX means that the method did not output any co-evolution pair; NO CLUSTERS means that the method output co-evolution pairs that could not be clustered together.

| Methods comparison - Protein A-B domain on 490 sequences |     |             |                                              |      |
|----------------------------------------------------------|-----|-------------|----------------------------------------------|------|
| Method                                                   | Al  | Cl          | Positions                                    | Sym  |
| BIS, <i>pos</i> , $d = 0$                                | 490 | C1          | <b>32 39</b>                                 | 1    |
| BIS, <i>pos</i> , $d = 1$                                | 490 | C1          | <b>11 13 14</b>                              | 1    |
| BIS, <i>blocks</i> , $d = 0$                             | 490 | C1          | <b>32 39</b>                                 | 1    |
| BIS, <i>blocks</i> , $d = 1$                             | 490 | C2          | <b>11 13-14</b>                              | 1    |
| ELSC                                                     | 490 | S1          | 30 33                                        | 0.61 |
| SCA-DB                                                   | 490 | S1          | 3 9 40                                       | 1    |
|                                                          |     | S2          | 30 33 34 38 40                               | 0.8  |
|                                                          |     | S3          | 30 33 34 38 40 46                            | 0.8  |
|                                                          |     | S4          | 30 33 38 40 46                               | 0.8  |
|                                                          |     | S5          | 49 53                                        | 0.7  |
|                                                          |     | S6          | 22 42                                        | 0.7  |
|                                                          |     | S7          | 47 35                                        | 0.7  |
|                                                          |     | S8          | 23 36                                        | 0.7  |
| SCA-TM                                                   | 490 | S1          | 3 9                                          | 1    |
|                                                          |     | S2          | 33 38                                        | 0.71 |
|                                                          |     | S3          | 30 34 40                                     | 0.61 |
|                                                          |     | S4          | 30 34 49 46                                  | 0.61 |
|                                                          |     | S5          | 30 46                                        | 0.61 |
|                                                          |     | S5          | 22 24                                        | 0.52 |
| MI                                                       | 490 | S1          | 20 19                                        | 1    |
|                                                          |     | S2          | 16 17 25                                     | 0.90 |
|                                                          |     | S3          | 7 6 16 17 25                                 | 0.90 |
|                                                          |     | S4          | 6 16 17                                      | 0.90 |
|                                                          |     | S5          | 41 44                                        | 0.90 |
|                                                          |     | S6          | 43 60                                        | 0.71 |
|                                                          |     | S7          | <b>11 13 14</b> 15 18                        | 0.33 |
|                                                          |     | S8          | 22 23 27 29                                  | 0.33 |
|                                                          |     | S9          | 30 31 32 33 34 35 36 37 38 39 40 42 46 48 49 | 0.33 |
| MST                                                      | 490 | S1          | <b>11 13 14</b>                              | 1    |
|                                                          |     | S2          | 8 6                                          | 0.90 |
|                                                          |     | S3          | 15 18                                        | 0.90 |
|                                                          |     | S4          | 22 23                                        | 0.90 |
| CTMP                                                     | 490 | NO CLUSTERS |                                              |      |

Table 2: **Protein A-B domain: comparing methodologies run over 490 sequences.**  
See legend of Table 1-Text S4.

| Methods comparison - Protein A-B domain on 28 sequences |    |             |                                              |      |
|---------------------------------------------------------|----|-------------|----------------------------------------------|------|
| Method                                                  | Al | Cl          | Positions                                    | Sym  |
| BIS, <i>pos</i> , $d = 0$                               | 28 | C1          | 32 39                                        | 1    |
| BIS, <i>pos</i> , $d = 1$                               | 28 | C1          | 11 13 14                                     | 1    |
| BIS, <i>blocks</i> , $d = 0$                            | 28 | C1          | 32 39                                        | 1    |
| BIS, <i>blocks</i> , $d = 1$                            | 28 | C1          | 11 13-14                                     | 1    |
| ELSC                                                    | 28 | S1          | 30 33                                        | 0.9  |
|                                                         |    | S2          | 11 13 14                                     | 0    |
|                                                         |    | S2          | 32 39                                        | 0    |
| SCA-DB                                                  | 28 | S1          | 11 13 14                                     | 0.3  |
|                                                         |    | S1          | 32 39                                        | 0.3  |
| SCA-TM                                                  | 28 | S1          | 11 13 14                                     | 0.3  |
|                                                         |    | S2          | 32 39                                        | 0.3  |
| MI                                                      | 28 | S1          | 20 19                                        | 1    |
|                                                         |    | S2          | 16 17 25                                     | 0.9  |
|                                                         |    | S3          | 6 7 16 17 25                                 | 0.9  |
|                                                         |    | S4          | 6 16 17 25                                   | 0.9  |
|                                                         |    | S5          | 41 44                                        | 0.7  |
|                                                         |    | S6          | 11 13 14 18                                  | 0.3  |
|                                                         |    | S7          | 22 23 27 29                                  | 0.3  |
|                                                         |    | S8          | 30 31 32 33 34 35 36 37 38 39 40 42 46 48 49 | 0.3  |
| MST                                                     | 28 | S1          | 11 13 14                                     | 1    |
|                                                         |    | S2          | 32 39                                        | 0.80 |
| CTMP                                                    | 28 | NO CLUSTERS |                                              |      |

Table 3: **Protein A-B domain: comparing methodologies run over 28 sequences.**

See legend of Table 1-Text S4.

| Methods comparison - Protein A-B domain on 20 sequences |     |             |                                                                |      |
|---------------------------------------------------------|-----|-------------|----------------------------------------------------------------|------|
| Method                                                  | Al  | Cl          | Positions                                                      | Sym  |
| BIS, <i>pos</i> , $d = 0$                               | 20  | C1          | 22 23 27 29                                                    | 1    |
|                                                         |     | C2          | 30 31 32 33 34 35 36 37 38 39 40 42 46 48 49                   | 1    |
|                                                         |     | C3          | 41 44                                                          | 1    |
|                                                         |     | C4          | 51 52                                                          | 1    |
| BIS, <i>pos</i> , $d = 1$                               | 20  | C1          | 11 13 14 15 18                                                 | 1    |
|                                                         |     | C2          | 16 17                                                          | 1    |
| BIS, <i>blocks</i> , $d = 0$                            | 20  | C1          | 22-23 27 29                                                    | 1    |
|                                                         |     | C2          | 29-40 42 46 48-49                                              | 1    |
|                                                         |     | C3          | 29-42 44                                                       | 1    |
|                                                         |     | C3          | 51 52                                                          | 1    |
| BIS, <i>blocks</i> , $d = 1$                            | 20  | C1          | 11 13-15 18                                                    | 1    |
|                                                         |     | C2          | 16 17                                                          | 1    |
| ELSC                                                    | 20  | S1          | 16 17                                                          | 1    |
|                                                         |     | S2          | 41 44                                                          | 0.90 |
|                                                         |     | S3          | 11 13 14 15 18                                                 | 0.61 |
|                                                         |     | S4          | 22 23 27 29 30 31 32 33 34 35 36 37 38 39 40 42 46 48 49 51 52 | 0.61 |
| SCA-DB                                                  | 20  | NO CLUSTERS |                                                                |      |
| SCA-TM                                                  | 452 | NO MATRIX   |                                                                |      |
| MI                                                      | 20  | S1          | 23 36                                                          | 0.2  |
| MST                                                     | 20  | S1          | 22 23 27 29                                                    | 1    |
|                                                         |     | S2          | 11 13 14 15 18                                                 | 1    |
|                                                         |     | S3          | 16 17                                                          | 1    |
|                                                         |     | S4          | 8 4                                                            | 0.63 |
| CTMP                                                    | 20  | NO CLUSTERS |                                                                |      |

Table 4: **Protein A-B domain comparing methodologies run over 20 sequences.**

See legend of Table 1-Text S4.
