# Supplementary material for: Protein Fragments: Functional and Structural Roles of Their Coevolution Networks
Source: PubMed Central journal article supplement (PMC3489791; doi:10.1371/journal.pone.0048124), 2012-11-05
Supplement: pone.0048124.s007.pdf [file pone.0048124.s007.pdf]

Supporting Information Text S5:  
analysis of SF motifs and extended SF motifs  
after coevolution analysis of the  
AATPase families

| SF motifs          |                         |                         |       |
|--------------------|-------------------------|-------------------------|-------|
| SF family          | # residues in SF motifs | # co-evolving positions | Ratio |
| Upf1               | 18                      | 26                      | 0.69  |
| RecD               | 32                      | 73                      | 0.43  |
| UvrD/Rep           | 30                      | 38                      | 0.78  |
| Rad3               | 28                      | 62                      | 0.45  |
| DEAD-box           | 16                      | 16                      | 1     |
| RecQ               | 31                      | 42                      | 0.73  |
| Ski2-like          | 22                      | 35                      | 0.62  |
| RigI-like          | 40                      | 104                     | 0.38  |
| DEAH-RHA           | 29                      | 43                      | 0.67  |
| NS3/NPH-II         | 36                      | 101                     | 0.35  |
| Swi2/Snf2          | 14                      | 15                      | 0.93  |
| Extended SF motifs |                         |                         |       |
| Upf1               | 23                      | 26                      | 0.88  |
| RecD/Pif1          | 50                      | 73                      | 0.68  |
| UvrD               | 37                      | 38                      | 0.97  |
| Rad3               | 52                      | 62                      | 0.83  |
| DEAD-box           | 16                      | 16                      | 1     |
| RecQ               | 39                      | 42                      | 0.92  |
| Ski2-like          | 26                      | 35                      | 0.74  |
| RigI-like          | 70                      | 104                     | 0.67  |
| DEAH-RHA           | 41                      | 43                      | 0.95  |
| NS3/NPH-II         | 72                      | 101                     | 0.71  |
| Swi2/Snf2          | 15                      | 15                      | 1     |

Table 1: **AATPase subfamilies: information about BIS analysis on SF motifs and extended SF motifs.**

BIS analysis of 11 helicase subfamilies (first column). BIS was run on blocks of  $d \leq 1$ . Top: we report the number of co-evolving positions that belong to the SF motifs as defined in (Fairman-Williams et al. 2010) (second column), the total number of coevolving positions (third column), the ratio of the second and third columns (fourth column). Whenever a residue belongs to one of the clusters in either  $d = 0$  or  $d = 1$ , it will be counted once. Notice that a ratio equal 1 corresponds to co-evolving residues that belong to known SF-motifs. Bottom: as on top but considering an extension of SF motifs instead of SF motifs. As defined in the article, SF motifs are extended on their right and left hand side by 5 positions. The idea is to verify whether predicted co-evolving residues are essentially located around motifs or not.

| SF families                                                        | MST                            |                               |               |       | ELSC                          |               |       |                               | SCA-DB        |       |                               |               | SCA-TM |                               |               |       |
|--------------------------------------------------------------------|--------------------------------|-------------------------------|---------------|-------|-------------------------------|---------------|-------|-------------------------------|---------------|-------|-------------------------------|---------------|--------|-------------------------------|---------------|-------|
|                                                                    | total #<br>res in SF<br>motifs | #co-ev<br>res in SF<br>motifs | #co-ev<br>pos | Ratio | #co-ev<br>res in SF<br>motifs | #co-ev<br>pos | Ratio | #co-ev<br>res in SF<br>motifs | #co-ev<br>pos | Ratio | #co-ev<br>res in SF<br>motifs | #co-ev<br>pos | Ratio  | #co-ev<br>res in SF<br>motifs | #co-ev<br>pos | Ratio |
| UpfI                                                               | 64                             | 21                            | 35            | 0.60  | 14                            | 22            | 0.64  | 4                             | 8             | 0.50  | 2                             | 5             | 0.40   |                               |               |       |
| RecD/PfI                                                           | 55                             | 26                            | 63            | 0.41  | 20                            | 87            | 0.23  | 7                             | 12            | 0.58  | 6                             | 10            | 0.60   |                               |               |       |
| UvrD                                                               | 62                             | 31                            | 59            | 0.52  | 22                            | 65            | 0.34  | 8                             | 18            | 0.44  | 8                             | 16            | 0.50   |                               |               |       |
| Rad3                                                               | 55                             | 31                            | 110           | 0.28  | 10                            | 25            | 0.40  | 5                             | 22            | 0.23  | 1                             | 7             | 0.14   |                               |               |       |
| DEAD-box                                                           | 66                             | 17                            | 17            | 1     | 0                             | 0             | 0     | 4                             | 4             | 1     | 4                             | 4             | 1.00   |                               |               |       |
| RecQ                                                               | 65                             | 38                            | 81            | 0.47  | 25                            | 35            | 0.71  | 18                            | 47            | 0.38  | 18                            | 47            | 0.38   |                               |               |       |
| Skp2-like                                                          | 62                             | 32                            | 53            | 0.60  | 13                            | 70            | 0.19  | 3                             | 6             | 0.50  | 3                             | 6             | 0.50   |                               |               |       |
| RigI-Like                                                          | 64                             | 48                            | 207           | 0.23  | 13                            | 70            | 0.19  | 3                             | 8             | 0.38  | 3                             | 8             | 0.38   |                               |               |       |
| Deah-RHA                                                           | 63                             | 33                            | 55            | 0.60  | 11                            | 15            | 0.73  | 10                            | 17            | 0.59  | 8                             | 13            | 0.62   |                               |               |       |
| NSS/NPH-I                                                          | 62                             | 41                            | 132           | 0.31  | 0                             | 2             | 0     | 1                             | 2             | 0.50  | 1                             | 2             | 0.50   |                               |               |       |
| Swi2/Snf2                                                          | 76                             | 15                            | 20            | 0.75  | 4                             | 19            | 0.21  | 0                             | 0             | 0     | 0                             | 0             | 0.00   |                               |               |       |
| <b>MST, ELSC, SCA-DB and SCA-TM analyses of extended SF motifs</b> |                                |                               |               |       |                               |               |       |                               |               |       |                               |               |        |                               |               |       |
| UpfI                                                               | 129                            | 24                            | 35            | 0.69  | 15                            | 22            | 0.68  | 5                             | 8             | 0.63  | 3                             | 5             | 0.60   |                               |               |       |
| RecD/PfI                                                           | 110                            | 35                            | 63            | 0.56  | 23                            | 87            | 0.26  | 7                             | 12            | 0.58  | 6                             | 10            | 0.60   |                               |               |       |
| UvrD                                                               | 122                            | 39                            | 59            | 0.66  | 24                            | 65            | 0.37  | 13                            | 18            | 0.72  | 11                            | 16            | 0.69   |                               |               |       |
| Rad3                                                               | 120                            | 54                            | 110           | 0.49  | 10                            | 25            | 0.40  | 14                            | 22            | 0.64  | 4                             | 7             | 0.57   |                               |               |       |
| DEAD-box                                                           | 136                            | 17                            | 17            | 1     | 0                             | 0             | 0     | 4                             | 4             | 1     | 4                             | 4             | 1.00   |                               |               |       |
| RecQ                                                               | 135                            | 53                            | 81            | 0.65  | 28                            | 35            | 0.80  | 31                            | 47            | 0.66  | 31                            | 47            | 0.66   |                               |               |       |
| Skp2-like                                                          | 132                            | 43                            | 53            | 0.81  | 15                            | 70            | 0.21  | 5                             | 6             | 0.83  | 5                             | 6             | 0.83   |                               |               |       |
| RigI-Like                                                          | 134                            | 86                            | 207           | 0.42  | 15                            | 70            | 0.21  | 5                             | 8             | 0.63  | 5                             | 8             | 0.63   |                               |               |       |
| Deah-RHA                                                           | 133                            | 43                            | 55            | 0.78  | 14                            | 15            | 0.93  | 13                            | 17            | 0.76  | 10                            | 13            | 0.77   |                               |               |       |
| NSS/NPH-II                                                         | 125                            | 63                            | 132           | 0.48  | 1                             | 2             | 0.50  | 1                             | 2             | 0.50  | 1                             | 2             | 0.50   |                               |               |       |
| Swi2/Snf2                                                          | 146                            | 17                            | 20            | 0.85  | 4                             | 19            | 0.21  | 0                             | 0             | 0     | 0                             | 0             | 0.00   |                               |               |       |

Table 2: **AATPase subfamilies: information on MST, ELSC, SCA-DB and SCA-TM analyses of SF motifs and extended SF motifs.**

MST, ELSC, SCA-DB and SCA-TM analyses realized on 11 helicases subfamilies (first column). MI and CTMP did not provide any prediction. For each SF family, the total size of the SF motifs, as defined in (Fairman-Williams et al. 2010), is reported (second column). Top: for each method of coevolution analysis (MST, ELSC, SCA-DB and SCA-TM) we report the total number of coevolving positions detected by the method, the number of co-evolving positions detected by the method and belonging to the SF motif, the ratio of the two numbers. Notice that a ratio equal 1 corresponds to co-evolving residues that belong to known SF-motifs. Bottom: as on top but considering an extension of SF motifs instead of SF motifs. As defined in the article, SF motifs are extended on their right and left hand side by 5 positions. The idea is to verify whether predicted coevolving residues are essentially located around motifs or not. Compare to Table 1-Text S5.

| S-Fam | Name       | NAB   | PNB    | H/NAB                  | NAB/PNB               | H/NAB/PNB           | Conserved                   | Not Correlated        | Not a motif |
|-------|------------|-------|--------|------------------------|-----------------------|---------------------|-----------------------------|-----------------------|-------------|
| SF1   | Upf1       | Ib Ic |        | I Ia VI                |                       |                     | Q I II III IIIa IV Va Vb VI | Ia V                  | iVa         |
| SF1   | RecD/Pif1  | Ia V  |        | II IIIa Ic Vb<br>Q V   |                       |                     | Q I Ia II III V Va VI       |                       | I Va Ib     |
| SF1   | UvrD       |       |        | Ia VI                  | IV IVA Va             |                     | I II III IIIa IV V Va VB VI |                       | Ib          |
| SF2   | Rad3       |       | III Va | Ia II                  | Ia Ib III IV          |                     | I II III IV Va Vb VI        | Q IC IVA V            | IIIa        |
| SF2   | DEAD-box   | Ia Ic |        | Ia VI                  |                       |                     | Q I II III Va VI            | Ib IV Iva V Vb        | IIIa        |
| SF2   | RecQ       |       |        | Q I Ia IV VI<br>I Ic V | III IV Va             |                     | Q I Ia II III V Va Vb VI    | Ib Iva                | IIIa IB     |
| SF2   | Sh2-like   | Ic V  |        | I V                    |                       | I Ia V Va           | I Ia II III V Va VI         | Q IV IVa Vb           | IIIa        |
| SF2   | RigI-like  |       |        | Ia II Vb VI            | III IV Iva<br>Ia V Va |                     | Q I Ia Ic II III IV V Va VI | Ib Iva                | Ib IIIA     |
| SF2   | DEAH-RHA   | Ia IV |        |                        |                       | I Ia Ic II III V Va | Q I Ia II III V Vb VI       | Iva                   | IIIa        |
| SF2   | NS3/NPH-II |       |        | Ic V                   | III IV<br>III V Va Vb |                     | I Ia Ib Ic II III Vb VI     |                       | IIIa IB     |
| SF2   | Swi2/Snf2  |       |        |                        |                       | Ia Va VI            | I Ia III VI                 | Ib Ic III IIIa IV IVa |             |

Table 3: **AATPase subfamilies: correlations between motifs for  $d \leq 1$  in SF1 and SF2 subfamilies.**

Coevolution analysis highlights that known SF motifs defined in (Fairman-Williams et al. 2010) are correlated. We say that two motifs are correlated when there is at least a pair of co-evolving residues that belongs to the motifs. Correlations are summarized in several columns identifying the function of the motifs: ATP binding and hydrolysis (H), nucleic acid binding (NAB) and coordination between polynucleotide binding and ATPase activity (PNB). The last three columns (from left to right) list: motifs forming a cluster of fully conserved residues, motifs that do not contain coevolving residues, known motifs that do not belong to the specific subfamily.
