# Supplementary material for: Protein Fragments: Functional and Structural Roles of Their Coevolution Networks
Source: PubMed Central journal article supplement (PMC3489791; doi:10.1371/journal.pone.0048124), 2012-11-05
Supplement: pone.0048124.s008.pdf [file pone.0048124.s008.pdf]

Supporting Information Text S6:  
AATPase supplementary figures

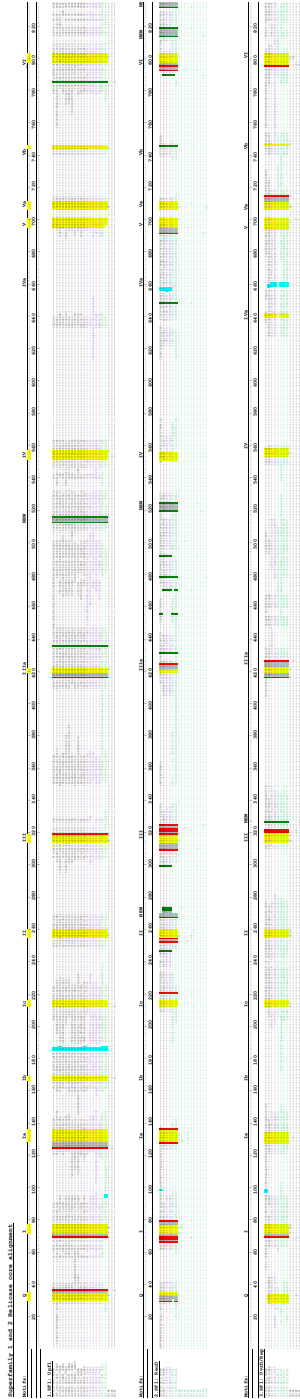

Figure 1: **AATPase: alignment and co-evolution of motifs in the SF1 family.**

Alignments and motif extensions for SF1 helicases families. Alignments are given in (Fairman-Williams et al. 2010). Each known motif is reported in yellow; red positions are co-evolved positions that are used to identify extensions of known motifs; green positions are co-evolved positions that lie distant from known motifs and that, when grouped together (with an allowed distance of  $\leq 5$  positions), form newly identified motifs. In grey, positions belonging to a new motif or to an extension of a known motif. Below each alignment, distinguished lines describe positions (denoted X) belonging to different co-evolving networks. Note that large insertions are removed from the alignment. These sections are marked by cyan highlights of the number of deleted residues.

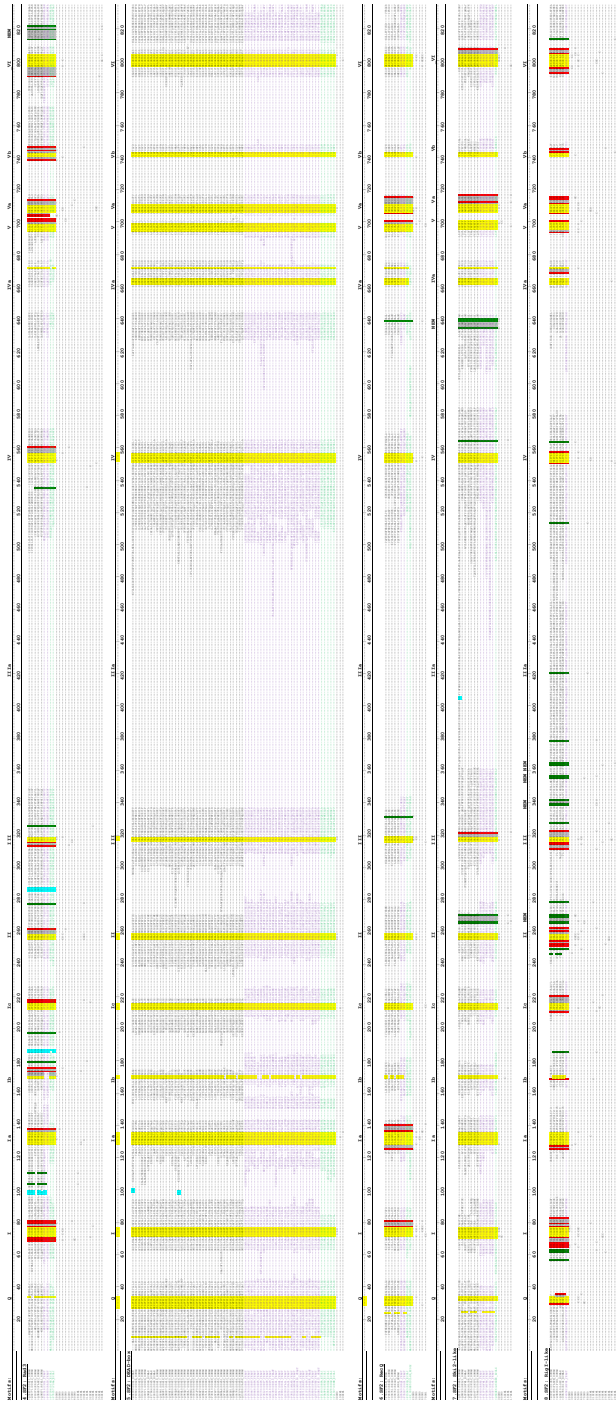

Figure 2: **AATPase: alignment and co-evolution of motifs in the SF2 family, part 1.** Alignments and motif extensions for SF2 helicases families. Legend as in Fig. 1-Text S6.

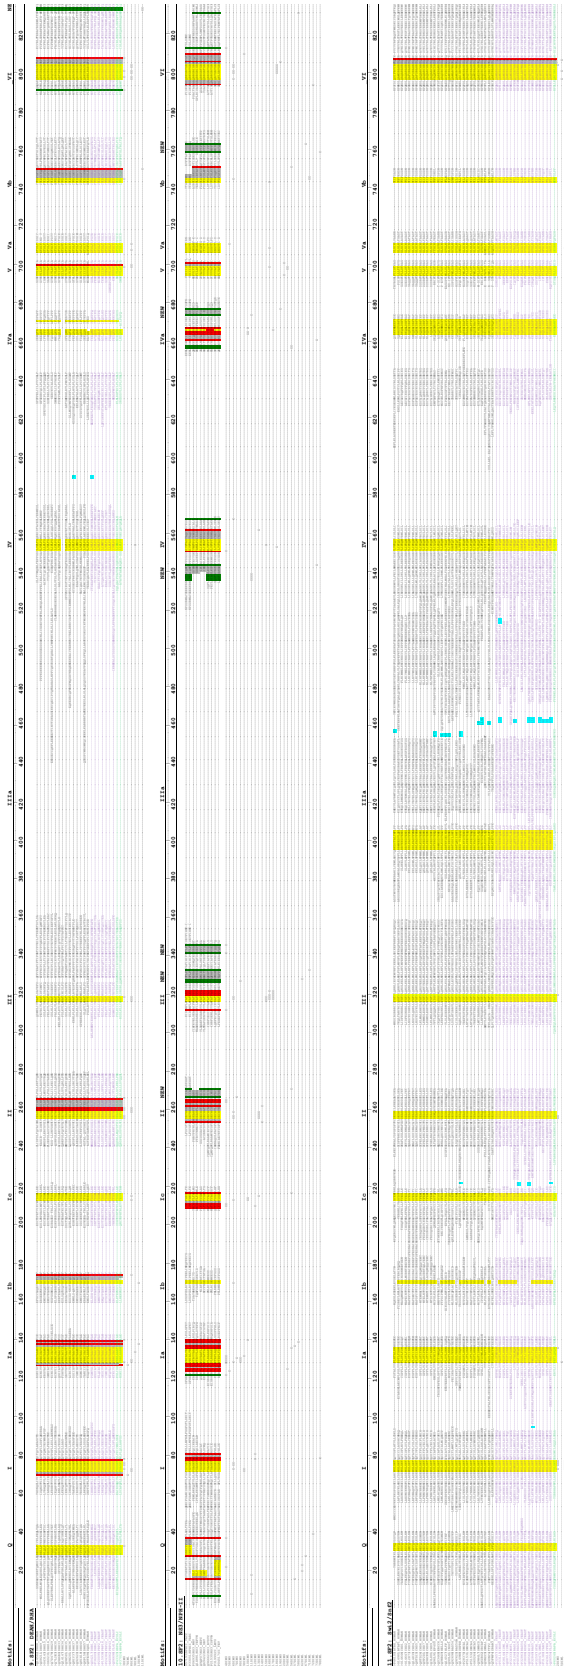

Figure 3: **AATPase: alignment and co-evolution of motifs in the SF2 family, part 2.**  
 Figure 2-Text S6, continued.

| SF  | Family     | Q | I | IA | IB | IC | II |
|-----|------------|---|---|----|----|----|----|
| SF1 | Upf1       |   |   |    |    |    |    |
| SF1 | RecD       |   |   |    |    |    |    |
| SF1 | UvrD/Rep   |   |   |    |    |    |    |
| SF2 | Rad3       |   |   |    |    |    |    |
| SF2 | DEAD-box   |   |   |    |    |    |    |
| SF2 | RecQ       |   |   |    |    |    |    |
| SF2 | Ski2-like  |   |   |    |    |    |    |
| SF2 | Riq1-like  |   |   |    |    |    |    |
| SF2 | DEAH/REA   |   |   |    |    |    |    |
| SF2 | NS3-NPH-II |   |   |    |    |    |    |
| SF2 | Swi2/Snf2  |   |   |    |    |    |    |

Figure 4: AATPase: logos of protein sequence motifs, part 1.

Extension of known motifs identified for SF1 and SF2 helicase families in (Fairman-Williams et al. 2010) and new motifs. Columns in the table correspond to motifs (the name of a known motif is reported on the top; NEW indicates that the motif is predicted by co-evolution signals) and rows correspond to distinguished families (class and family names are reported). Co-evolving residues are labelled by a star and extended residues by a square. Nine motifs are new. For motif localisation along the sequence, refer to Figs 2 and 3-Text S6. Logos are realized with the package WebLogo (Crooks GE, Hon G, Chandonia JM, Brenner SE, WebLogo: A sequence logo generator, *Genome Research*, 14:1188–1190, 2004).

| SF  | Family     | NEW | III | NEW | NEW | NEW | IIIA | NEW |
|-----|------------|-----|-----|-----|-----|-----|------|-----|
| SF1 | Upf1       |     |     |     |     |     |      |     |
| SF1 | RecD       |     |     |     |     |     |      |     |
| SF1 | UvrD/Rep   |     |     |     |     |     |      |     |
| SF2 | Rad3       |     |     |     |     |     |      |     |
| SF2 | DEAD-box   |     |     |     |     |     |      |     |
| SF2 | RecQ       |     |     |     |     |     |      |     |
| SF2 | Ski2-like  |     |     |     |     |     |      |     |
| SF2 | Riq1-like  |     |     |     |     |     |      |     |
| SF2 | DEAH/REA   |     |     |     |     |     |      |     |
| SF2 | NS3-NPH-II |     |     |     |     |     |      |     |
| SF2 | Sm12/Smf2  |     |     |     |     |     |      |     |

Figure 5: AATPase: logs of protein sequence motifs, part 2.

Figure 4-Text S6 continued.

| SF  | Family      | IV                                                                                | NEW                                                                                 | IVA                                                                                 | NEW | V                                                                                 | VA |
|-----|-------------|-----------------------------------------------------------------------------------|-------------------------------------------------------------------------------------|-------------------------------------------------------------------------------------|-----|-----------------------------------------------------------------------------------|----|
| SF1 | Upf1        |  |                                                                                     |                                                                                     |     |  |    |
| SF1 | RecD        |  |                                                                                     |                                                                                     |     |  |    |
| SF1 | UvrD/Rep    |  |                                                                                     |  |     |  |    |
| SF2 | Rad3        |  |                                                                                     |                                                                                     |     |  |    |
| SF2 | DEAD-box    |                                                                                   |                                                                                     |                                                                                     |     |  |    |
| SF2 | RecQ        |                                                                                   |                                                                                     |                                                                                     |     |  |    |
| SF2 | SkI2-like   |  |  |                                                                                     |     |  |    |
| SF2 | RigI-like   |  |                                                                                     |  |     |  |    |
| SF2 | DEAH/REA    |  |                                                                                     |                                                                                     |     |  |    |
| SF2 | NS3-NPH-III |  |  |                                                                                     |     |  |    |
| SF2 | Swi2/Snf2   |                                                                                   |                                                                                     |                                                                                     |     |  |    |

Figure 6: AATPase: logs of protein sequence motifs, part 3.

Figure 4-Text S6 continued.

| SF  | Family     | VB | NEW | VI | NEW | NEW |
|-----|------------|----|-----|----|-----|-----|
| SF1 | Upf1       |    |     |    |     |     |
| SF1 | RecD       |    |     |    |     |     |
| SF1 | UvrD/Rep   |    |     |    |     |     |
| SF2 | Rad3       |    |     |    |     |     |
| SF2 | DEAD-box   |    |     |    |     |     |
| SF2 | RecQ       |    |     |    |     |     |
| SF2 | Ski2-like  |    |     |    |     |     |
| SF2 | RigI-like  |    |     |    |     |     |
| SF2 | DEAH/REA   |    |     |    |     |     |
| SF2 | NS3-NPH-II |    |     |    |     |     |
| SF2 | Swi2/Snf2  |    |     |    |     |     |

Figure 7: AATPase: logos of protein sequence motifs, part 4.

Figure 4-Text S6 continued.
