# Supplementary material for: Protein Fragments: Functional and Structural Roles of Their Coevolution Networks
Source: PubMed Central journal article supplement (PMC3489791; doi:10.1371/journal.pone.0048124), 2012-11-05
Supplement: pone.0048124.s009.pdf [file pone.0048124.s009.pdf]

Supporting Information Text 7:  
BIS coevolution analysis based on  
physico-chemical properties

| Protein A-B domain          |    |                      |     |
|-----------------------------|----|----------------------|-----|
| Method                      | Cl | Positions            | Sym |
| BIS, <i>block</i> , $d = 0$ | C1 | 20 22-24 27 29       | 1   |
|                             | C2 | 29-40 42 45-46 48-49 | 1   |
|                             | C3 | 29-42 44-46          | 1   |
|                             | C4 | 51 52                | 1   |
| BIS, <i>block</i> , $d = 1$ | C5 | 11-15 17-18          | 1   |
|                             | C6 | 53 54                | 1   |

Table 1: **Coevolution analysis based on physico-chemical properties: protein A-B domain.**  
 BIS analysis based on physico-chemical properties was run on the protein A-B domain family of 452 sequences.

| MukB protein                |     |                                                                                                                                                                                                                                                    |     |
|-----------------------------|-----|----------------------------------------------------------------------------------------------------------------------------------------------------------------------------------------------------------------------------------------------------|-----|
| Method                      | Cl  | Positions                                                                                                                                                                                                                                          | Sym |
| BIS, <i>block</i> , $d = 0$ | C1  | 4 6 9                                                                                                                                                                                                                                              | 1   |
|                             | C2  | 13-20 22-26                                                                                                                                                                                                                                        | 1   |
|                             | C3  | 34-37 39-42                                                                                                                                                                                                                                        | 1   |
|                             | C4  | 10 11                                                                                                                                                                                                                                              | 1   |
| BIS, <i>block</i> , $d = 1$ | C5  | 44-45 47-48 51-54 56-58 60-67 69 72-81 84 86-87 90-91<br>94-95 99 101 104 106 108-109 112-113 115-116 118 121<br>123 126 135-136 140 146-147 150 152-154 157 165<br>170-171 173 175 178-180 182-183 186-189 193-194 196<br>198-211 213-223 225 227 | 1   |
|                             | C6  | 98-99 173-175                                                                                                                                                                                                                                      | 1   |
|                             | C7  | 56-67 101-102 132-133                                                                                                                                                                                                                              | 1   |
|                             | C8  | 104-109 111-119 165-166 182-184 186-190                                                                                                                                                                                                            | 1   |
|                             | C9  | 51-58 135-137                                                                                                                                                                                                                                      | 1   |
|                             | C10 | 47-49 145-147                                                                                                                                                                                                                                      | 1   |
|                             | C11 | 28 29 30 31 32 33                                                                                                                                                                                                                                  | 1   |

Table 2: **Coevolution analysis based on physico-chemical properties: MukB protein.**  
 BIS analysis based on physico-chemical properties was run on the MukB family of 200 sequences.

| Amyloid beta peptide        |    |                   |   |
|-----------------------------|----|-------------------|---|
| BIS, <i>block</i> , $d = 0$ | C1 | 11-12 16-20       | 1 |
|                             | C2 | 18-20 23-24 26-38 | 1 |
| BIS, <i>block</i> , $d = 1$ | C3 | 21 22             | 1 |
|                             | C4 | 39 40 41 42       | 1 |

Table 3: **Coevolution analysis based on physico-chemical properties: Amyloid beta peptide.**  
 BIS analysis based on physico-chemical properties was run on the Amyloid family of 80 sequences.

| <b>AATPase Upfl</b>         |    |                                                                                                                                                                                                            |   |
|-----------------------------|----|------------------------------------------------------------------------------------------------------------------------------------------------------------------------------------------------------------|---|
| BIS, <i>block</i> , $d = 0$ | C1 | 34 37-38 70 73 75-77 83-84 88 125 130 134 168-169 210 213<br>254-257 267 312-316 319-320 362-363 417 422 427 436 513<br>516 551 557 561 634 700 708-709 715 741-743 745 788 795<br>799-801 806 809 820 833 | 1 |
|                             | C2 | 124-125 440                                                                                                                                                                                                | 1 |
|                             | C3 | 137 141 797                                                                                                                                                                                                | 1 |
|                             | C4 | 209-210 270 361-363 554                                                                                                                                                                                    | 1 |
| BIS, <i>block</i> , $d = 1$ | C5 | 432 516-517                                                                                                                                                                                                | 1 |
|                             | C6 | 67-68 548 550-551 697 786                                                                                                                                                                                  | 1 |

Table 4: **Coevolution analysis based on physico-chemical properties: AATPase Upfl.**  
BIS analysis based on physico-chemical properties was run on the Upfl family of 18 sequences.

| <b>AATPase Ski2-like</b>    |    |                                                                                                                                                                   |        |
|-----------------------------|----|-------------------------------------------------------------------------------------------------------------------------------------------------------------------|--------|
| BIS, <i>block</i> , $d = 0$ | C1 | 71-72 127                                                                                                                                                         | 1      |
|                             | C2 | 67 72 75-77 129 133 141 211 250 253-257 259 261 314<br>316-317 320 326 329-330 632 635-636 639-640 643 665 692 694<br>698 709-712 717 741-742 797-798 800-804 808 | 1      |
|                             |    | C3                                                                                                                                                                | 84 209 |
|                             | C4 | 700 701                                                                                                                                                           | 1      |
| BIS, <i>block</i> , $d = 1$ | C5 | 67-68 131 145 168 672                                                                                                                                             | 1      |
|                             | C6 | 66-67 170 671                                                                                                                                                     | 1      |
|                             | C7 | 80 213 252-257 266 271 552-553 558 565 568 818                                                                                                                    | 1      |
|                             | C8 | 253-259 267 270 322 554 694-695 708-713 819                                                                                                                       | 1      |

Table 5: **Coevolution analysis based on physico-chemical properties: AATPase Ski2-like.**  
BIS analysis based on physico-chemical properties was run on the Ski2-like family of 13 sequences.

| AATPase RecD                |                  |                                                         |     |
|-----------------------------|------------------|---------------------------------------------------------|-----|
| Method                      | Cl               | Positions                                               | Sym |
| BIS, <i>block</i> , $d = 0$ | C1               | 79-80 127 247 440                                       | 1   |
|                             | C2               | 34 37 40-41 67 69-70 73 75-77 80 83-84 87 130 133-134   | 1   |
|                             |                  | 137 253-257 259-261 266 269 311-313 315-316 319-320 323 |     |
|                             |                  | 421-422 432 435 496-497 520 528 554 699-701 708-709 746 |     |
|                             |                  | 795-796 798-801 819 832 835                             |     |
|                             | C3               | 65-67 97 129-130 132-134 272-274 299 310-313 417 454    | 1   |
|                             |                  | 456-458 462 465 476 520-521 551 553-554 806 808 811     |     |
|                             | C4               | 819-820 835-836 839                                     | 1   |
|                             | C5               | 133-135 852 855                                         | 1   |
|                             | C6               | 239 813                                                 | 1   |
|                             | C7               | 249 845                                                 | 1   |
|                             | C8               | 311-316 323-324 641                                     | 1   |
|                             | C9               | 439 501 552 712 790 814 817                             | 1   |
| C10                         | 484 745-746      | 1                                                       |     |
| C11                         | 668 818-819      | 1                                                       |     |
| C12                         | 67-70 803        | 1                                                       |     |
| C13                         | 708-710 812      | 1                                                       |     |
| BIS, <i>block</i> , $d = 1$ | C14              | 711 795-801                                             | 1   |
|                             | C15              | 90 94 124 252-257                                       | 1   |
|                             | C16              | 30 125 421-423 643 692 824                              | 1   |
|                             |                  | 126 128 130-131 214-215 265-266 334 420-422 425 646-647 |     |
|                             | C17              | 696 740                                                 | 1   |
|                             | C18              | 213 268-269 442 479 512 523 530 623 645 698-701 798-802 | 1   |
|                             | C19              | 218 832-833                                             | 1   |
|                             | C20              | 221 269-270 322-323 471 646-649                         | 1   |
|                             | C21              | 238 480                                                 | 1   |
|                             | C22              | 300 305 318-320 492 525 633 685 687 793                 | 1   |
|                             | C23              | 302 325 417-418 426 435-436 561 650                     | 1   |
|                             | C24              | 336 823                                                 | 1   |
|                             | C25              | 36-37 510 697                                           | 1   |
|                             | C26              | 406 672                                                 | 1   |
|                             | C27              | 482 504                                                 | 1   |
|                             | C28              | 483 506                                                 | 1   |
| C29                         | 499 670          | 1                                                       |     |
| C30                         | 75-78 92 502 681 | 1                                                       |     |
|                             |                  | 240 241                                                 | 1   |

Table 6: **Coevolution analysis based on physico-chemical properties: AATPase RecD.**  
 BIS analysis based on physico-chemical properties was run on the RecD family of 6 sequences.

| AATPase UvrD                |     |                                                                                                                                                                            |     |
|-----------------------------|-----|----------------------------------------------------------------------------------------------------------------------------------------------------------------------------|-----|
| Method                      | Cl  | Positions                                                                                                                                                                  | Sym |
| BIS, <i>block</i> , $d = 0$ | C1  | 68 73-77 125 129 213 215 253 256-257 259-260 268-269 313<br>315-316 319 321 417 420 422 427 434-435 463 553-554 556 697<br>699-701 708-709 715 717 747 791 795 800-801 825 | 1   |
|                             | C2  | 125-126 133                                                                                                                                                                | 1   |
|                             | C3  | 128-129 635                                                                                                                                                                | 1   |
|                             | C4  | 81 312-313                                                                                                                                                                 | 1   |
|                             | C5  | 745 793                                                                                                                                                                    | 1   |
|                             | C6  | 37 38                                                                                                                                                                      | 1   |
| BIS, <i>block</i> , $d = 1$ | C7  | 34 70 80 124-125 141 209 213-215 217 222 253-257 313-316<br>321-322 325 746-747 794-795 797                                                                                | 1   |
|                             | C8  | 68-69 132 712 800-802 806                                                                                                                                                  | 1   |
|                             | C9  | 142 665-666                                                                                                                                                                | 1   |
|                             | C10 | 88 145 311 695                                                                                                                                                             | 1   |
|                             | C11 | 237 427-428 641 651 708-711                                                                                                                                                | 1   |
|                             | C12 | 250 328                                                                                                                                                                    | 1   |
|                             | C13 | 327 795-796 799-801                                                                                                                                                        | 1   |
|                             | C14 | 94 340                                                                                                                                                                     | 1   |
|                             | C15 | 450 485 742                                                                                                                                                                | 1   |
|                             | C16 | 496 697-701                                                                                                                                                                | 1   |
|                             | C17 | 558 679                                                                                                                                                                    | 1   |
|                             | C18 | 629 635-636                                                                                                                                                                | 1   |
|                             | C19 | 631 634-635                                                                                                                                                                | 1   |
|                             | C20 | 632 644                                                                                                                                                                    | 1   |
|                             | C21 | 674 720                                                                                                                                                                    | 1   |
|                             | C22 | 839 842                                                                                                                                                                    | 1   |
|                             | C23 | 239 240                                                                                                                                                                    | 1   |

Table 7: **Coevolution analysis based on physico-chemical properties: AATPase UvrD.**  
 BIS analysis based on physico-chemical properties was run on the UvrD family of 8 sequences.

| AATPase Rad3                |     |                                                                                                                                                                  |     |
|-----------------------------|-----|------------------------------------------------------------------------------------------------------------------------------------------------------------------|-----|
| Method                      | Cl  | Positions                                                                                                                                                        | Sym |
| BIS, <i>block</i> , $d = 0$ | C1  | 105 329                                                                                                                                                          | 1   |
|                             | C2  | 111 115                                                                                                                                                          | 1   |
|                             | C3  | 80-81 126 130-132 143 171 318-320 330 633 700 704-710 739<br>745-746                                                                                             | 1   |
|                             | C4  | 128 174                                                                                                                                                          | 1   |
|                             | C5  | 34 67-69 72-73 75-77 81 85 130-131 136 139 176 218<br>252-257 259 261 273 306 313-315 319-320 538 551 553 557<br>561 568 697 708-710 712 741 746 756 797 799 801 | 1   |
|                             | C6  | 67-70 133 138-139 198                                                                                                                                            | 1   |
|                             | C7  | 139-140 640                                                                                                                                                      | 1   |
|                             | C8  | 213 714                                                                                                                                                          | 1   |
|                             | C9  | 261-262 702 704-712                                                                                                                                              | 1   |
|                             | C10 | 269 291 313-317 708-712 814                                                                                                                                      | 1   |
|                             | C11 | 87 326                                                                                                                                                           | 1   |
|                             | C12 | 564 748                                                                                                                                                          | 1   |
| BIS, <i>block</i> , $d = 1$ | C13 | 102 106 335                                                                                                                                                      | 1   |
|                             | C14 | 104 107 111-112                                                                                                                                                  | 1   |
|                             | C15 | 113 761                                                                                                                                                          | 1   |
|                             | C16 | 117 282 305-306                                                                                                                                                  | 1   |
|                             | C17 | 125-126 143-144                                                                                                                                                  | 1   |
|                             | C18 | 13 846                                                                                                                                                           | 1   |
|                             | C19 | 134 165                                                                                                                                                          | 1   |
|                             | C20 | 71-73 75-78 169 210 217-218 323 549-551 553-554                                                                                                                  | 1   |
|                             | C21 | 175-176 639 743                                                                                                                                                  | 1   |
|                             | C22 | 38 72-77 176-177 201 209 252-261 273-274 278 557-558<br>697-698 741-742 746-747 759 808                                                                          | 1   |
|                             | C23 | 199 565                                                                                                                                                          | 1   |
|                             | C24 | 204 297 819                                                                                                                                                      | 1   |
|                             | C25 | 211 542 695                                                                                                                                                      | 1   |
|                             | C26 | 223 845                                                                                                                                                          | 1   |
|                             | C27 | 23 31                                                                                                                                                            | 1   |
|                             | C28 | 85-86 249                                                                                                                                                        | 1   |
|                             | C29 | 298 300                                                                                                                                                          | 1   |
|                             | C30 | 92 326-327                                                                                                                                                       | 1   |
|                             | C31 | 520 629-630                                                                                                                                                      | 1   |
|                             | C32 | 540 661                                                                                                                                                          | 1   |
|                             | C33 | 571 740-741                                                                                                                                                      | 1   |
|                             | C34 | 669 696-697                                                                                                                                                      | 1   |
|                             | C35 | 795 799-801 803-804 816 818 820 822                                                                                                                              | 1   |

Table 8: **Coevolution analysis based on physico-chemical properties: AATPase Rad3.**  
 BIS analysis based on physico-chemical properties was run on the Rad3 family of 9 sequences.

| AATPase DEAD-box            |    |                                                     |     |
|-----------------------------|----|-----------------------------------------------------|-----|
| Method                      | Cl | Positions                                           | Sym |
| BIS, <i>block</i> , $d = 0$ | C1 | 33-34 38 72-73 75-77 85 127 133 209 213 217 254-257 | 1   |
|                             |    | 259 315 318-319 552 672 699 708-710 715 741 797 804 |     |
| BIS, <i>block</i> , $d = 1$ | C2 | 130 696                                             | 1   |
|                             | C3 | 136 801                                             | 1   |
|                             | C4 | 317-319 712                                         | 1   |

Table 9: **Coevolution analysis based on physico-chemical properties: AATPase DEAD-box.**  
 BIS analysis based on physico-chemical properties was run on the Ski2-like family of 67 sequences.

| AATPase RecQ                |             |                                                               |     |
|-----------------------------|-------------|---------------------------------------------------------------|-----|
| Method                      | Cl          | Positions                                                     | Sym |
| BIS, <i>block</i> , $d = 0$ | C1          | 24 34 67-68 72 75-78 125 127 129 133 136 141 210 217          | 1   |
|                             |             | 253 255-259 314 317-320 552-553 568 639 696 699 706 708-710   |     |
|                             |             | 715 797 801-804                                               |     |
|                             | C2          | 75-79 125-127 255-260 327 332 552-554 668 699-700 706-710 712 | 1   |
|                             |             | 715-716 795                                                   |     |
|                             |             | 160 338-339                                                   |     |
| C3                          | 160 338-339 | 1                                                             |     |
|                             | 518 564     |                                                               |     |
|                             | 80 695-696  |                                                               |     |
| BIS, <i>block</i> , $d = 1$ | C6          | 124-127 263                                                   | 1   |
|                             | C7          | 42 70 72-73 129-130 209-210 214-215 268 316-320 328 698-699   | 1   |
|                             | C8          | 29 81 133-134 136-137 212 264 555 665 672 746 792 800-804     | 1   |
|                             | C9          | 207 792-793                                                   | 1   |
|                             | C10         | 213 250                                                       | 1   |
|                             | C11         | 244 815                                                       | 1   |
|                             | C12         | 65 267                                                        | 1   |
|                             | C13         | 82 84 562 717                                                 | 1   |
|                             | C14         | 669 744                                                       | 1   |
|                             | C15         | 85 693                                                        | 1   |

Table 10: **Coevolution analysis based on physico-chemical properties: AATPase RecQ.**  
 BIS analysis based on physico-chemical properties was run on the RecQ family of 9 sequences.

| AATPase RigI-like           |     |                                                                                                                                                                                                                             |     |
|-----------------------------|-----|-----------------------------------------------------------------------------------------------------------------------------------------------------------------------------------------------------------------------------|-----|
| Method                      | Cl  | Positions                                                                                                                                                                                                                   | Sym |
| BIS, <i>block</i> , $d = 0$ | C1  | 31 33-34 57 65 67 70 72-73 75-77 79 83 125-126<br>128 136 213 217 250 253-257 259 267 270-271 317-319 379<br>383 552-554 558 561 564 567-568 581 669 672 694 696-697<br>699 701 707-712 741-743 796-797 800-801 804 815-817 | 1   |
|                             | C2  | 128-129 131 252-259 343 706-712 799-801 804-805 808                                                                                                                                                                         | 1   |
|                             | C3  | 65-67 75-79 130 746                                                                                                                                                                                                         | 1   |
|                             | C4  | 139 522 854                                                                                                                                                                                                                 | 1   |
|                             | C5  | 145 169 275 321                                                                                                                                                                                                             | 1   |
|                             | C6  | 36 176 261 279 312 315 334 341                                                                                                                                                                                              | 1   |
|                             | C7  | 90 219-220                                                                                                                                                                                                                  | 1   |
|                             | C8  | 245 247-248 264 803-804                                                                                                                                                                                                     | 1   |
|                             | C9  | 30-31 266-267 400 552-555 661                                                                                                                                                                                               | 1   |
|                             | C10 | 322 333                                                                                                                                                                                                                     | 1   |
|                             | C11 | 345 356 545 796-801                                                                                                                                                                                                         | 1   |
|                             | C12 | 421 540 641                                                                                                                                                                                                                 | 1   |
|                             | C13 | 452 501 512                                                                                                                                                                                                                 | 1   |
|                             | C14 | 57-58 453                                                                                                                                                                                                                   | 1   |
|                             | C15 | 87 745                                                                                                                                                                                                                      | 1   |
|                             | C16 | 715 716                                                                                                                                                                                                                     | 1   |
| BIS, <i>block</i> , $d = 1$ | C17 | 70-73 124-126 133 168 181 210-211 216-217<br>221 313-314 316-319 331 364 387 538 793                                                                                                                                        | 1   |
|                             | C18 | 33-35 60-61 67-68 81 125-128 335                                                                                                                                                                                            | 1   |
|                             | C19 | 79-80 134 336 449 560-561 815-818                                                                                                                                                                                           | 1   |
|                             | C20 | 141 146                                                                                                                                                                                                                     | 1   |
|                             | C21 | 143 439 458                                                                                                                                                                                                                 | 1   |
|                             | C22 | 23 147 392                                                                                                                                                                                                                  | 1   |
|                             | C23 | 148-149 365 551-554 671-672 741-744 747 814-818                                                                                                                                                                             | 1   |
|                             | C24 | 166 575 829                                                                                                                                                                                                                 | 1   |
|                             | C25 | 171 509 520 845                                                                                                                                                                                                             | 1   |
|                             | C26 | 63 186 209-211 263 274 278-279 323 339-343 349 357 386-387<br>557-558 748                                                                                                                                                   | 1   |
|                             | C27 | 20 827                                                                                                                                                                                                                      | 1   |
|                             | C28 | 213-214 223 548 806                                                                                                                                                                                                         | 1   |
|                             | C29 | 217-218 462                                                                                                                                                                                                                 | 1   |
|                             | C30 | 224 503 549 813                                                                                                                                                                                                             | 1   |
|                             | C31 | 62 225 324 418                                                                                                                                                                                                              | 1   |
|                             | C32 | 262 430                                                                                                                                                                                                                     | 1   |
|                             | C33 | 28 325 412 556 571 636                                                                                                                                                                                                      | 1   |
|                             | C34 | 311-312 511 842                                                                                                                                                                                                             | 1   |
|                             | C35 | 328 361 383-384 433 672-673                                                                                                                                                                                                 | 1   |
|                             | C36 | 329 640                                                                                                                                                                                                                     | 1   |
|                             | C37 | 347 644 664 668-669 694-697 699-701                                                                                                                                                                                         | 1   |
|                             | C38 | 351 665                                                                                                                                                                                                                     | 1   |
|                             | C39 | 9 353                                                                                                                                                                                                                       | 1   |
|                             | C40 | 359 416 497                                                                                                                                                                                                                 | 1   |
|                             | C41 | 381 856                                                                                                                                                                                                                     | 1   |
|                             | C42 | 385 836                                                                                                                                                                                                                     | 1   |
|                             | C43 | 401 500 794                                                                                                                                                                                                                 | 1   |
|                             | C44 | 406-407 826 840                                                                                                                                                                                                             | 1   |
|                             | C45 | 411 850                                                                                                                                                                                                                     | 1   |
|                             | C46 | 72-77 434 564-565 570                                                                                                                                                                                                       | 1   |
|                             | C47 | 531 844                                                                                                                                                                                                                     | 1   |
|                             | C48 | 534 832                                                                                                                                                                                                                     | 1   |
|                             | C49 | 547 662 749                                                                                                                                                                                                                 | 1   |
|                             | C50 | 715 716                                                                                                                                                                                                                     | 1   |

Table 11: **Coevolution analysis based on physico-chemical properties: AATPase RigI-like.**  
 BIS analysis based on physico-chemical properties was run on the RigI-like family of 6 sequences.



| AATPase DEAH-RHA            |     |                                                                                                                                                                                 |     |
|-----------------------------|-----|---------------------------------------------------------------------------------------------------------------------------------------------------------------------------------|-----|
| Method                      | Cl  | Positions                                                                                                                                                                       | Sym |
| BIS, <i>block</i> , $d = 0$ | C1  | 32-33 41 67-68 73 75-78 80 124 129 132 137 140-141<br>173 209 217 253-258 260-261 266 268 272 313 315 318-319<br>696-697 699 701 710-712 744-745 791 795 798 801 808 817<br>835 | 1   |
|                             | C2  | 265-266 833                                                                                                                                                                     | 1   |
| BIS, <i>block</i> , $d = 1$ | C3  | 70 127 840                                                                                                                                                                      | 1   |
|                             | C4  | 72-73 129-132 173-174 213 215 253-261 266-269 311 313-315<br>317-319 325 699-701 708 750 797-798 800-801 803-804                                                                | 1   |
|                             | C5  | 134 551-552 554-555 561                                                                                                                                                         | 1   |
|                             | C6  | 137-138 170                                                                                                                                                                     | 1   |
|                             | C7  | 216-217 701-702 707                                                                                                                                                             | 1   |
|                             | C8  | 247 693                                                                                                                                                                         | 1   |
|                             | C9  | 271-272 847                                                                                                                                                                     | 1   |
|                             | C10 | 743-745 760                                                                                                                                                                     | 1   |
|                             | C11 | 833-835 837                                                                                                                                                                     | 1   |

Table 12: **Coevolution analysis based on physico-chemical properties: AATPase DEAH-RHA.**  
 BIS analysis based on physico-chemical properties was run on the DEAH-RHA family of 24 sequences.

| AATPase NS3-NPH-II          |     |                                                                                                                                                       |     |
|-----------------------------|-----|-------------------------------------------------------------------------------------------------------------------------------------------------------|-----|
| Method                      | Cl  | Positions                                                                                                                                             | Sym |
| BIS, <i>block</i> , $d = 0$ | C1  | 68 73 75-77 125-126 129 141 170 209 213 253-254 256-257<br>259 267 314 316-319 552-553 557 568 696-697 699 711 740 743<br>745 797-798 800-801 803-804 | 1   |
|                             | C2  | 75-78 124-126 708                                                                                                                                     | 1   |
|                             | C3  | 80 125-127 137 266-267 316-320 322 695-697 701 709                                                                                                    | 1   |
|                             | C4  | 8-9 13 35 79-80 536-539 674                                                                                                                           | 1   |
|                             | C5  | 129-130 316-322 834                                                                                                                                   | 1   |
|                             | C6  | 131 212-213                                                                                                                                           | 1   |
|                             | C7  | 132 314-319 552-554 797-801                                                                                                                           | 1   |
|                             | C8  | 140-141 665                                                                                                                                           | 1   |
|                             | C9  | 17-18 211 538                                                                                                                                         | 1   |
|                             | C10 | 209-210 806                                                                                                                                           | 1   |
|                             | C11 | 72-73 213-214 664 810                                                                                                                                 | 1   |
|                             | C12 | 215 562 856                                                                                                                                           | 1   |
|                             | C13 | 217 751                                                                                                                                               | 1   |
|                             | C14 | 218 262 666                                                                                                                                           | 1   |
|                             | C15 | 39 219 566 794                                                                                                                                        | 1   |
|                             | C16 | 22 256-259 264                                                                                                                                        | 1   |
|                             | C17 | 84 253-257 267-268 711-712 800-804                                                                                                                    | 1   |
|                             | C18 | 26 37                                                                                                                                                 | 1   |
|                             | C19 | 9 265-267 792 841                                                                                                                                     | 1   |
|                             | C20 | 30 327                                                                                                                                                | 1   |
|                             | C21 | 312 539 559 661 759                                                                                                                                   | 1   |
|                             | C22 | 338 543                                                                                                                                               | 1   |
|                             | C23 | 342 667                                                                                                                                               | 1   |
|                             | C24 | 346 659 847                                                                                                                                           | 1   |
|                             | C25 | 347 540 747                                                                                                                                           | 1   |
|                             | C26 | 55 540-541                                                                                                                                            | 1   |
|                             | C27 | 544 822                                                                                                                                               | 1   |
|                             | C28 | 551-553 677                                                                                                                                           | 1   |
|                             | C29 | 70 658                                                                                                                                                | 1   |
|                             | C30 | 759-761 838                                                                                                                                           | 1   |
|                             | C31 | 795 813                                                                                                                                               | 1   |
|                             | C32 | 845 850                                                                                                                                               | 1   |
| BIS, <i>block</i> , $d = 1$ | C33 | 121 259-260 832                                                                                                                                       | 1   |
|                             | C34 | 133 710-711 754                                                                                                                                       | 1   |
|                             | C35 | 136-137 844                                                                                                                                           | 1   |
|                             | C36 | 14 334                                                                                                                                                | 1   |
|                             | C37 | 15 821-822                                                                                                                                            | 1   |
|                             | C38 | 20 23 324                                                                                                                                             | 1   |
|                             | C39 | 250 313-314                                                                                                                                           | 1   |
|                             | C40 | 271 811                                                                                                                                               | 1   |
|                             | C41 | 28 311                                                                                                                                                | 1   |
|                             | C42 | 51-52 325                                                                                                                                             | 1   |
|                             | C43 | 38 693                                                                                                                                                | 1   |
|                             | C44 | 49 750                                                                                                                                                | 1   |
|                             | C45 | 757 848                                                                                                                                               | 1   |
|                             | C46 | 829 849                                                                                                                                               | 1   |
|                             | C47 | 790 791                                                                                                                                               | 1   |

Table 13: **Coevolution analysis based on physico-chemical properties: AATPase NS3-NPH-II.**  
 BIS analysis based on physico-chemical properties was run on the NS3-NPH-II family of 11 sequences.

| AATPase Swi2-Snf2           |    |                                                         |  |  |  |  |     |
|-----------------------------|----|---------------------------------------------------------|--|--|--|--|-----|
| Method                      | Cl | Positions                                               |  |  |  |  | Sym |
| BIS, <i>block</i> , $d = 0$ | C1 | 67-68 72-77 126 136 140 256-257 261 314 316 319-320 334 |  |  |  |  | 1   |
|                             |    | 695-697 711-712 745 747 804 814                         |  |  |  |  |     |
| BIS, <i>block</i> , $d = 1$ | C2 | 129 316-317 797 801 807                                 |  |  |  |  | 1   |
|                             | C3 | 70-77 217 395                                           |  |  |  |  | 1   |
|                             | C4 | 319-321 396 710-712                                     |  |  |  |  | 1   |
|                             | C5 | 332 792 827                                             |  |  |  |  | 1   |
|                             | C6 | 84 791                                                  |  |  |  |  | 1   |

Table 14: **Coevolution analysis based on physico-chemical properties: AATPase Swi2-Snf2.**  
 BIS analysis based on physico-chemical properties was run on the Swi2-Snf2 family of 45 sequences.

| BIS vs $BIS_{pc}$ analysis of AATPase SF motifs |                         |                         |       |                         |                         |       |
|-------------------------------------------------|-------------------------|-------------------------|-------|-------------------------|-------------------------|-------|
| SF family                                       | $BIS_{pc}$              |                         |       | BIS                     |                         |       |
|                                                 | # residues in SF motifs | # co-evolving positions | Ratio | # residues in SF motifs | # co-evolving positions | Ratio |
| UPF1                                            | 26                      | 76                      | 0.34  | 18                      | 26                      | 0.69  |
| RECD                                            | 45                      | 198                     | 0.23  | 32                      | 73                      | 0.44  |
| UvrD/rep                                        | 38                      | 117                     | 0.32  | 30                      | 38                      | 0.79  |
| Rad3                                            | 43                      | 169                     | 0.25  | 28                      | 62                      | 0.45  |
| DEAD-box                                        | 27                      | 38                      | 0.71  | 16                      | 16                      | 1     |
| RecQ                                            | 42                      | 104                     | 0.40  | 31                      | 42                      | 0.74  |
| Ski2-like                                       | 34                      | 83                      | 0.41  | 22                      | 35                      | 0.63  |
| RigI-like                                       | 56                      | 266                     | 0.21  | 40                      | 104                     | 0.38  |
| DEAH-RHA                                        | 43                      | 95                      | 0.45  | 29                      | 43                      | 0.67  |
| NS3-NPH-II                                      | 45                      | 172                     | 0.26  | 36                      | 101                     | 0.36  |
| Swi2-Snf2                                       | 22                      | 45                      | 0.49  | 14                      | 15                      | 0.93  |
| Extended SF motifs                              |                         |                         |       |                         |                         |       |
| UPF1                                            | 35                      | 76                      | 0.46  | 19                      | 26                      | 0.73  |
| RECD                                            | 67                      | 198                     | 0.34  | 64                      | 197                     | 0.32  |
| UvrD/rep                                        | 52                      | 117                     | 0.44  | 46                      | 76                      | 0.61  |
| Rad3                                            | 71                      | 169                     | 0.42  | 63                      | 157                     | 0.40  |
| DEAD-box                                        | 32                      | 38                      | 0.84  | 16                      | 16                      | 1     |
| RecQ                                            | 63                      | 104                     | 0.61  | 56                      | 92                      | 0.61  |
| Ski2-like                                       | 44                      | 83                      | 0.53  | 26                      | 37                      | 0.70  |
| RigI-like                                       | 96                      | 266                     | 0.36  | 88                      | 259                     | 0.34  |
| DEAH-RHA                                        | 60                      | 95                      | 0.63  | 41                      | 48                      | 0.85  |
| NS3-NPH-II                                      | 73                      | 172                     | 0.42  | 68                      | 152                     | 0.45  |
| Swi2-Snf2                                       | 30                      | 45                      | 0.67  | 17                      | 17                      | 1     |

Table 15: **BIS vs BIS based on physico-chemical properties in AATPase motifs analysis**  
 Analysis of BIS and BIS based on physico-chemical properties ( $BIS_{pc}$ ) of the 11 helicases subfamilies. BIS and  $BIS_{pc}$  were run on blocks of  $d \leq 1$ . Top: we report the number of coevolving motifs that belong to the SF motifs as defined in (Fairman-Williams et al. 2010) (second and fifth columns), the total number of coevolving positions (third and sixth columns), the ratio of the second and third/fifth and sixth columns (fourth and eighth columns). Whenever the residue belongs to one of the clusters in either  $d = 0$  or  $d = 1$ , it will be counted once. Notice that a ratio equal 1 corresponds to co-evolving residues that belong to known SF-motifs. Bottom: as on top but considering an extension of SF motifs instead of SF motifs. As defined in the article, SF motifs are extended on their right and left hand side by 5 positions. The idea is to verify whether predicted coevolving residues are essentially located around motifs or not.

| BIS analysis of co-evolution based on physico-chemical properties |      |      |     |      |        |    |    |     |     |               |      |      |      |      |
|-------------------------------------------------------------------|------|------|-----|------|--------|----|----|-----|-----|---------------|------|------|------|------|
|                                                                   | Size | API  | Pos | #Exp | #CoRes | TP | FN | FP  | TN  | Prob          | Sen* | Spe* | Acc* | PPV* |
| Amyloid                                                           | 80   | 0.90 | 43  | 25   | 28     | 22 | 3  | 6   | 12  | $2.99e^{-4}$  | 0.88 | 0.67 | 0.79 | 0.79 |
| MukB: Walker-A                                                    | 200  | 0.89 | 234 | 8    | 8      | 7  | 1  | 1   | 255 | $9.16e^{-12}$ | 0.88 | 1    | 0.99 | 0.88 |
| Protein A-B domain                                                | 452  | 0.86 | 57  | 36   | 35     | 29 | 7  | 6   | 15  | $1.42e^{-4}$  | 0.81 | 0.71 | 0.77 | 0.83 |
| Upfl                                                              | 18   | 0.68 | 677 | 64   | 76     | 26 | 38 | 50  | 563 | $7.68e^{-11}$ | 0.41 | 0.92 | 0.87 | 0.34 |
| Ski2-like                                                         | 13   | 0.61 | 686 | 62   | 83     | 34 | 28 | 49  | 575 | $2.19e^{-18}$ | 0.55 | 0.92 | 0.89 | 0.41 |
| RecD                                                              | 6    | 0.58 | 642 | 55   | 198    | 45 | 10 | 153 | 434 | $3.50e^{-16}$ | 0.82 | 0.74 | 0.75 | 0.23 |
| UvrD/Rep                                                          | 8    | 0.60 | 661 | 62   | 117    | 38 | 24 | 79  | 520 | $3.44e^{-16}$ | 0.61 | 0.87 | 0.84 | 0.32 |
| Rad3                                                              | 9    | 0.62 | 592 | 55   | 169    | 43 | 12 | 126 | 411 | $1.06e^{-15}$ | 0.78 | 0.77 | 0.77 | 0.25 |
| DEAD-box                                                          | 67   | 0.69 | 624 | 66   | 38     | 27 | 39 | 11  | 547 | $9.35e^{-21}$ | 0.41 | 0.98 | 0.92 | 0.71 |
| RecQ                                                              | 9    | 0.68 | 514 | 65   | 104    | 42 | 23 | 62  | 387 | $2.25e^{-17}$ | 0.65 | 0.86 | 0.83 | 0.40 |
| RigI-like                                                         | 6    | 0.53 | 656 | 64   | 266    | 56 | 8  | 210 | 382 | $3.62e^{-16}$ | 0.88 | 0.65 | 0.67 | 0.21 |
| DEAH-RHA                                                          | 24   | 0.73 | 562 | 63   | 95     | 43 | 20 | 52  | 447 | $6.35e^{-23}$ | 0.68 | 0.90 | 0.87 | 0.45 |
| NS3-NPH-II                                                        | 11   | 0.66 | 479 | 62   | 172    | 45 | 17 | 127 | 290 | $3.10e^{-10}$ | 0.73 | 0.70 | 0.70 | 0.26 |
| Swi2-Snf2                                                         | 45   | 0.62 | 714 | 76   | 45     | 22 | 54 | 23  | 615 | $1.26e^{-11}$ | 0.29 | 0.96 | 0.89 | 0.49 |

Table 16: **Validation of performance of coevolution analysis on physico-chemical properties.**

Percentage of identity computed on residue physico-chemical properties (API), number of sequences (Seq), alignment length (where all gapped positions, if any, are eliminated; Pos), number of experimentally confirmed residues (#Exp), number of residues identified by coevolution analysis (BIS), number of true positives (TP) computed by intersecting #Exp and BIS, probability of predicting TP residues out of #Exp by selecting BIS residues within Len residues (Prob), Sensitivity (Sen), Specificity (Spe), Accuracy (Acc), Positive Predictive Value (PPV) are given.). For Amyloid, experimentally validated residues (#Exp) have been obtained from the sources cited in the text; for Protein A we considered hotspots together with the large peptide fragment 25-59 and residues 14, 17 cited in (Sato et al. 2006) to have high  $\phi$ -value; MukB analysis is evaluated on Walker-A detection; Upfl and Ski2-like are evaluated on known motifs described in (Fairman-Williams et al. 2010). The number of coevolving residues detected by the methods are reported in column #CoRes. Compare with Table 2 in the article. Sen, Spe, Acc, PPV have been evaluated with respect to experimentally validated residues; they are marked with \* to remind this. The same is true for Prob.
