# Supplementary material for: Protein Fragments: Functional and Structural Roles of Their Coevolution Networks
Source: PubMed Central journal article supplement (PMC3489791; doi:10.1371/journal.pone.0048124), 2012-11-05
Supplement: pone.0048124.s012.pdf [file pone.0048124.s012.pdf]

Supporting Information Text S10:  
validation of performance of different  
coevolution analysis methods

|                      | Size | API  | Pos | #Exp | BIS | TP | FN | FP | TN  | Prob          | Sen* | Spe* | Acc* | PPV* | Alignment                 | pdb    |
|----------------------|------|------|-----|------|-----|----|----|----|-----|---------------|------|------|------|------|---------------------------|--------|
| Amyloid              | 80   | 0.87 | 43  | 25   | 27  | 22 | 3  | 5  | 13  | $7.79e^{-5}$  | 0.88 | 0.72 | 0.81 | 0.81 | PFAM PF03494              | 1aal   |
|                      | 16   | 0.77 | 43  | 25   | 24  | 20 | 5  | 4  | 14  | $2.16e^{-4}$  | 0.80 | 0.78 | 0.79 | 0.83 |                           |        |
| MukB - Walker A      | 200  | 0.84 | 234 | 8    | 8   | 7  | 1  | 1  | 225 | $9.16e^{-12}$ | 0.88 | 1    | 0.99 | 0.88 | PFAM PF04310              | 1qpl:A |
|                      | 205  | 0.81 | 274 | 8    | 4   | 4  | 4  | 0  | 266 | $3.05e^{-7}$  | 0.5  | 1    | 0.99 | 1    |                           |        |
|                      | 49   | 0.77 | 234 | 8    | 13  | 7  | 1  | 6  | 220 | $1.92e^{-9}$  | 0.88 | 0.97 | 0.97 | 0.54 |                           |        |
|                      | 54   | 0.6  | 274 | 8    | 4   | 4  | 4  | 0  | 266 | $3.05e^{-7}$  | 0.50 | 1    | 0.99 | 1    |                           |        |
| Protein A - B domain | 20   | 0.71 | 57  | 36   | 30  | 25 | 11 | 5  | 16  | $9.89e^{-4}$  | 0.69 | 0.76 | 0.72 | 0.83 | PFAM PF02216              | 1bdd:A |
|                      | 28   | 0.6  | 62  | 36   | 5   | 3  | 33 | 2  | 24  | 0.65          | 0.08 | 0.92 | 0.44 | 0.60 |                           |        |
|                      | 452  | 0.82 | 57  | 36   | 30  | 25 | 11 | 5  | 16  | $9.89e^{-4}$  | 0.69 | 0.76 | 0.72 | 0.83 |                           |        |
|                      | 490  | 0.75 | 62  | 36   | 5   | 3  | 33 | 2  | 24  | 0.65          | 0.08 | 0.92 | 0.44 | 0.60 |                           |        |
| Upf1                 | 18   | 0.58 | 677 | 64   | 26  | 18 | 46 | 8  | 605 | $2.93e^{-14}$ | 0.28 | 0.99 | 0.92 | 0.69 | [FW <i>et al.</i> , 2010] | 2gjk   |
| RecD                 | 6    | 0.51 | 642 | 55   | 73  | 32 | 23 | 41 | 546 | $1.63e^{-19}$ | 0.58 | 0.93 | 0.90 | 0.44 | [FW <i>et al.</i> , 2010] | 1p4d   |
| UvrD/rep             | 8    | 0.53 | 661 | 62   | 38  | 30 | 32 | 8  | 591 | $1.89e^{-27}$ | 0.48 | 0.99 | 0.94 | 0.79 | [FW <i>et al.</i> , 2010] | 21s1   |
| Rad3                 | 9    | 0.52 | 592 | 55   | 62  | 28 | 27 | 34 | 503 | $3.53e^{-16}$ | 0.51 | 0.94 | 0.90 | 0.45 | [FW <i>et al.</i> , 2010] | 3erv   |
| DEAD-box             | 67   | 0.61 | 624 | 66   | 16  | 16 | 50 | 0  | 558 | $4.11e^{-17}$ | 0.24 | 1    | 0.92 | 1    | [FW <i>et al.</i> , 2010] | 315x   |
| RecQ                 | 9    | 0.61 | 514 | 65   | 42  | 31 | 34 | 11 | 438 | $1.25e^{-22}$ | 0.48 | 0.98 | 0.91 | 0.74 | [FW <i>et al.</i> , 2010] | 2vix   |
| Sh2-like             | 13   | 0.51 | 686 | 62   | 35  | 22 | 40 | 13 | 611 | $1.47e^{-16}$ | 0.35 | 0.98 | 0.92 | 0.63 | [FW <i>et al.</i> , 2010] | 2xgj   |
| RigI-like            | 6    | 0.47 | 658 | 64   | 104 | 40 | 24 | 64 | 530 | $9.42e^{-20}$ | 0.63 | 0.89 | 0.87 | 0.38 | [FW <i>et al.</i> , 2010] | 1y99   |
| DEAH-RRHA            | 24   | 0.65 | 562 | 63   | 43  | 29 | 34 | 14 | 485 | $8.06e^{-21}$ | 0.46 | 0.97 | 0.91 | 0.67 | [FW <i>et al.</i> , 2010] | 3kx2   |
| NS3-NPH-II           | 11   | 0.6  | 479 | 62   | 101 | 36 | 26 | 65 | 352 | $4.83e^{-12}$ | 0.58 | 0.84 | 0.81 | 0.36 | [FW <i>et al.</i> , 2010] | 1ca1   |
| Swi2-Snf2            | 45   | 0.51 | 714 | 76   | 15  | 14 | 62 | 1  | 637 | $1.05e^{-13}$ | 0.18 | 1    | 0.91 | 0.93 | [FW <i>et al.</i> , 2010] | 3dqg   |

Table 1: **Validation of performance of coevolution analysis realized with BIS.**

Percentage of identity for the alignment (API), number of sequences (Size), alignment length (where all gapped positions, if any, are eliminated; Pos), number of experimentally confirmed residues (#Exp), number of residues identified by coevolution analysis (BIS), number of true positives (TP) computed by intersecting #Exp and BIS, probability of predicting TP residues out of #Exp by selecting BIS residues within Len residues (Prob), Sensitivity (Sen), Specificity (Spe), Accuracy (Acc), Positive Predictive Value (PPV) are given. For Amyloid, experimentally validated residues (#Exp) have been obtained from the different sources cited in the text; for Protein A we considered hotspots together with the large peptide fragment [25-59] and residues 14, 17 to have high  $\Phi$ -value; MukB analysis is evaluated on Walker-A detection; the AATPase family is evaluated on all motifs described in (Fairman-Williams et al. 2010). Sen, Spe, Acc, PPV have been evaluated with respect to experimentally validated residues; they are marked with \* to remind this. The same is true for Prob.

|                    | Size | API  | Pos | #Exp | MST | TP | FN | FP  | TN  | Prob          | Sen* | Spe* | Acc* | PPV* | Alignment       | pdb    |
|--------------------|------|------|-----|------|-----|----|----|-----|-----|---------------|------|------|------|------|-----------------|--------|
| Amyloid            | 80   | 0.87 | 43  | 25   | 16  | 12 | 13 | 4   | 14  | 0.08          | 0.48 | 0.78 | 0.60 | 0.75 | PFAM PF03494    | 1am1   |
| MnkB - Walker A    | 16   | 0.77 | 43  | 25   | 21  | 16 | 9  | 5   | 13  | 0.02          | 0.64 | 0.72 | 0.67 | 0.76 | PFAM PF04310    | 1qhl:A |
| Protein A B domain | 200  | 0.84 | 234 | 8    | -   | -  | -  | -   | -   | -             | -    | -    | -    | -    | -               | -      |
|                    | 205  | 0.81 | 274 | 8    | 6   | 5  | 3  | 1   | 265 | $2.68e^{-8}$  | 0.63 | 1.00 | 0.99 | 0.83 | -               | -      |
|                    | 49   | 0.77 | 234 | 8    | -   | -  | -  | -   | -   | -             | -    | -    | -    | -    | -               | -      |
|                    | 54   | 0.6  | 274 | 8    | 6   | 5  | 3  | 1   | 265 | $2.68e^{-8}$  | 0.63 | 1.00 | 0.99 | 0.83 | -               | -      |
| Upfl               | 20   | 0.71 | 57  | 36   | 13  | 6  | 30 | 7   | 14  | 0.96          | 0.17 | 0.67 | 0.35 | 0.46 | PFAM PF02216    | 1bad:A |
|                    | 28   | 0.6  | 62  | 36   | 5   | 3  | 33 | 2   | 24  | 0.65          | 0.08 | 0.92 | 0.44 | 0.60 | -               | -      |
|                    | 452  | 0.82 | 57  | 36   | 17  | 7  | 29 | 10  | 11  | 0.99          | 0.19 | 0.52 | 0.32 | 0.41 | -               | -      |
|                    | 490  | 0.75 | 62  | 36   | 9   | 3  | 33 | 6   | 20  | 0.98          | 0.08 | 0.77 | 0.37 | 0.33 | -               | -      |
| RecD               | 18   | 0.58 | 677 | 64   | 35  | 21 | 43 | 14  | 599 | $9.66e^{-15}$ | 0.33 | 0.98 | 0.92 | 0.60 | [FWet al. 2010] | 2gjk   |
|                    | 6    | 0.51 | 642 | 55   | 63  | 26 | 29 | 37  | 550 | $1.48e^{-14}$ | 0.47 | 0.94 | 0.90 | 0.41 | [FWet al. 2010] | 1p4d   |
| UvrD/rep           | 8    | 0.53 | 661 | 62   | 59  | 31 | 31 | 28  | 571 | $4.01e^{-20}$ | 0.50 | 0.95 | 0.91 | 0.53 | [FWet al. 2010] | 2is1   |
|                    | 9    | 0.52 | 592 | 55   | 110 | 31 | 24 | 79  | 458 | $3.10e^{-11}$ | 0.56 | 0.85 | 0.83 | 0.28 | [FWet al. 2010] | 3crv   |
| DEAD-box           | 67   | 0.61 | 624 | 66   | 17  | 17 | 49 | 0   | 558 | $3.38e^{-18}$ | 0.26 | 1.00 | 0.92 | 1.00 | [FWet al. 2010] | 3i5x   |
|                    | 9    | 0.61 | 514 | 65   | 81  | 38 | 27 | 43  | 406 | $4.21e^{-18}$ | 0.58 | 0.90 | 0.86 | 0.47 | [FWet al. 2010] | 2v1x   |
| Ski2-like          | 13   | 0.51 | 686 | 62   | 53  | 32 | 30 | 21  | 603 | $5.15e^{-24}$ | 0.52 | 0.97 | 0.93 | 0.60 | [FWet al. 2010] | 2xg]   |
|                    | 6    | 0.47 | 658 | 64   | 207 | 48 | 16 | 159 | 435 | $4.98e^{-14}$ | 0.75 | 0.73 | 0.73 | 0.23 | [FWet al. 2010] | 1wp9   |
| DEAH-RHA           | 24   | 0.65 | 562 | 63   | 55  | 33 | 30 | 22  | 477 | $1.29e^{-21}$ | 0.52 | 0.96 | 0.91 | 0.60 | [FWet al. 2010] | 3kx2   |
|                    | 11   | 0.6  | 479 | 62   | 132 | 41 | 21 | 91  | 326 | $8.67e^{-12}$ | 0.66 | 0.78 | 0.77 | 0.31 | [FWet al. 2010] | 1cu1   |
| Swi2-Smf2          | 45   | 0.51 | 714 | 76   | 20  | 15 | 61 | 5   | 633 | $6.81e^{-12}$ | 0.20 | 0.99 | 0.91 | 0.75 | [FWet al. 2010] | 3dmq   |

Table 2: Validation of performance of  $c_3$  evolution analysis realized with MST.

See legend of Table 1-Text 10.

|                    | Size | API  | Pos | #Exp | ELSC | TP | FN | FP | TN  | Prob            | Sen* | Spe* | Acc* | PPV* | Alignment       | pdb    |
|--------------------|------|------|-----|------|------|----|----|----|-----|-----------------|------|------|------|------|-----------------|--------|
| Amyloid            | 80   | 0.87 | 43  | 25   | 28   | 20 | 5  | 8  | 10  | $1.83e^{-2}$    | 0.80 | 0.56 | 0.70 | 0.71 | PFAM PF03494    | 1am1   |
|                    | 16   | 0.77 | 43  | 25   | 25   | 21 | 4  | 4  | 14  | $6.68e^{-5}$    | 0.84 | 0.78 | 0.81 | 0.84 |                 |        |
| MnkB Walker A      | 200  | 0.84 | 234 | 8    | 13   | 7  | 1  | 6  | 220 | $1.93e^{-9}$    | 0.88 | 0.97 | 0.97 | 0.54 | PFAM PF04310    | 1qhl:A |
|                    | 205  | 0.81 | 274 | 8    | 6    | 5  | 3  | 1  | 265 | $2.68e^{-8}$    | 0.63 | 1    | 0.99 | 0.83 |                 |        |
|                    | 49   | 0.77 | 234 | 8    | 13   | 7  | 1  | 6  | 220 | $1.93e^{-9}$    | 0.88 | 0.97 | 0.97 | 0.54 |                 |        |
|                    | 54   | 0.6  | 274 | 8    | -    | -  | -  | -  | -   | -               | -    | -    | -    | -    |                 |        |
| Protein A B domain | 20   | 0.71 | 57  | 36   | 30   | 25 | 11 | 5  | 16  | $9.89128e^{-4}$ | 0.69 | 0.76 | 0.72 | 0.83 | PFAM PF02216    | 1bad:A |
|                    | 28   | 0.6  | 62  | 36   | 7    | 5  | 31 | 2  | 24  | 0.36            | 0.14 | 0.92 | 0.47 | 0.71 |                 |        |
|                    | 452  | 0.82 | 57  | 36   | 33   | 24 | 12 | 9  | 12  | 0.07            | 0.67 | 0.57 | 0.63 | 0.73 |                 |        |
|                    | 490  | 0.75 | 62  | 36   | 2    | 2  | 34 | 0  | 26  | 0.33            | 0.06 | 1    | 0.45 | 1    |                 |        |
| Upfl               | 18   | 0.58 | 677 | 64   | 22   | 14 | 50 | 8  | 605 | $2.00e^{-10}$   | 0.22 | 0.99 | 0.91 | 0.64 | [FWet al. 2010] | 2gjk   |
| RecD               | 6    | 0.51 | 642 | 55   | 87   | 20 | 35 | 67 | 520 | $5.78e^{-6}$    | 0.36 | 0.89 | 0.84 | 0.23 | [FWet al. 2010] | 1p4d   |
| UvrD/rep           | 8    | 0.53 | 661 | 62   | 65   | 22 | 40 | 43 | 556 | $3.90e^{-9}$    | 0.35 | 0.93 | 0.87 | 0.34 | [FWet al. 2010] | 2is1   |
| Rad3               | 9    | 0.52 | 592 | 55   | 25   | 10 | 45 | 15 | 522 | $2.36e^{-5}$    | 0.18 | 0.97 | 0.90 | 0.40 | [FWet al. 2010] | 3crv   |
| DEAD-box           | 67   | 0.61 | 624 | 66   | -    | -  | -  | -  | -   | -               | -    | -    | -    | -    | [FWet al. 2010] | 3i5x   |
| RecQ               | 9    | 0.61 | 514 | 65   | 35   | 25 | 40 | 10 | 439 | $2.47e^{-17}$   | 0.38 | 0.98 | 0.90 | 0.71 | [FWet al. 2010] | 2v1x   |
| Ski2-like          | 13   | 0.51 | 686 | 62   | 70   | 13 | 49 | 57 | 567 | $6.13e^{-3}$    | 0.21 | 0.91 | 0.85 | 0.19 | [FWet al. 2010] | 2xgJ   |
| RigI-like          | 6    | 0.47 | 658 | 64   | 70   | 13 | 51 | 57 | 537 | 0.01            | 0.20 | 0.90 | 0.84 | 0.19 | [FWet al. 2010] | 1wp9   |
| DEAH-RHA           | 24   | 0.65 | 562 | 63   | 15   | 11 | 52 | 4  | 495 | $1.46e^{-8}$    | 0.17 | 0.99 | 0.90 | 0.73 | [FWet al. 2010] | 3kx2   |
| NS3-NPH-II         | 11   | 0.6  | 479 | 62   | 2    | 0  | 62 | 2  | 415 | 1               | 0    | 1    | 0.87 | 0    | [FWet al. 2010] | 1cu1   |
| Swi2-Smf2          | 45   | 0.51 | 714 | 76   | 19   | 4  | 72 | 15 | 623 | 0.13            | 0.05 | 0.98 | 0.88 | 0.21 | [FWet al. 2010] | 3dmq   |

Table 3: Validation of performance of coevolution analysis realized with ELSC.

See legend of Table 1-Text 10.

|                    | Size | API  | Pos | #Exp | MI | TP | FN | FP | TN   | Prob         | Sen* | Spe* | Acc* | PPV* | Alignment    | pdb    |
|--------------------|------|------|-----|------|----|----|----|----|------|--------------|------|------|------|------|--------------|--------|
| Amyloid            | 80   | 0.87 | 43  | 25   | 25 | 20 | 5  | 5  | 13   | $8.15e^{-4}$ | 0.80 | 0.72 | 0.77 | 0.80 | PFAM PF03494 | 1aml   |
|                    | 16   | 0.77 | 43  | 25   | 5  | 5  | 20 | 0  | 18   | 0.06         | 0.20 | 1    | 0.53 | 1    |              |        |
| MukB - Walker A    | 200  | 0.81 | 274 | 8    | -  | -  | -  | -  | -    | -            | -    | -    | -    | -    | PFAM PF04310 | 1qhl:A |
|                    | 205  | 0.81 | 274 | 8    | 5  | 2  | 6  | 3  | 263  | 0.007        | 0.25 | 0.99 | 0.97 | 0.40 |              |        |
|                    | 49   | 0.77 | 234 | 8    | -  | -  | -  | -  | -    | -            | -    | -    | -    | -    |              |        |
|                    | 54   | 0.6  | 274 | 8    | 5  | 2  | 6  | 3  | 263  | 0.007        | 0.25 | 0.99 | 0.97 | 0.40 |              |        |
| Protein A B domain | 20   | 0.71 | 57  | 36   | 2  | 2  | 34 | 0  | 21   | 0.39         | 0.06 | 1    | 0.40 | 1    | PFAM PF02216 | 1bdd:A |
|                    | 28   | 0.6  | 62  | 36   | 32 | 25 | 11 | 7  | 19   | $1.02e^{-3}$ | 0.69 | 0.73 | 0.71 | 0.78 |              |        |
|                    | 452  | 0.82 | 36  | 14   | 10 | 26 | 4  | 17 | 0.34 | 0.28         | 0.81 | 0.47 | 0.71 | 0.71 |              |        |
|                    | 490  | 0.75 | 62  | 36   | 35 | 26 | 10 | 9  | 17   | $3.4e^{-3}$  | 0.72 | 0.65 | 0.69 | 0.74 |              |        |

Table 4: Validation of performance of coevolution analysis realized with MI.

See legend of Table 1-Text 10.

|                      | Size | API  | Pos | #Exp | SCA-DB | TP | FN | FP | TN  | Prob          | Sen* | Spe* | Acc* | PPV* | Alignment       | pdb    |
|----------------------|------|------|-----|------|--------|----|----|----|-----|---------------|------|------|------|------|-----------------|--------|
| Amyloid              | 80   | 0.87 | 43  | 25   | -      | -  | -  | -  | -   | -             | -    | -    | -    | -    | PFAM PF03494    | 1am1   |
|                      | 16   | 0.77 | 43  | 25   | -      | -  | -  | -  | -   | -             | -    | -    | -    | -    |                 |        |
| MukB - Walker A      | 200  | 0.84 | 234 | 8    | 8      | 7  | 1  | 1  | 225 | $9.16e^{-12}$ | 0.88 | 1    | 0.99 | 0.88 | PFAM PF04310    | 1qhl:A |
|                      | 205  | 0.81 | 274 | 8    | -      | -  | -  | -  | -   | -             | -    | -    | -    | -    |                 |        |
|                      | 49   | 0.77 | 234 | 8    | 8      | 7  | 1  | 1  | 225 | $9.16e^{-12}$ | 0.88 | 1    | 0.99 | 0.88 |                 |        |
|                      | 54   | 0.6  | 274 | 8    | -      | -  | -  | -  | -   | -             | -    | -    | -    | -    |                 |        |
| Protein A - B domain | 20   | 0.71 | 57  | 36   | -      | -  | -  | -  | -   | -             | -    | -    | -    | -    | PFAM PF02216    | 1bad:A |
|                      | 28   | 0.6  | 62  | 36   | 5      | 3  | 33 | 2  | 24  | 0.65          | 0.08 | 0.92 | 0.44 | 0.60 |                 |        |
|                      | 452  | 0.82 | 57  | 36   | 29     | 22 | 14 | 7  | 14  | $3.97e^{-2}$  | 0.61 | 0.67 | 0.63 | 0.76 |                 |        |
|                      | 490  | 0.75 | 62  | 36   | 16     | 13 | 23 | 3  | 23  | $2.70e^{-2}$  | 0.36 | 0.88 | 0.58 | 0.81 |                 |        |
|                      | 18   | 0.58 | 677 | 64   | 8      | 4  | 60 | 4  | 609 | $3.82e^{-3}$  | 0.06 | 0.99 | 0.91 | 0.50 | [FWet al. 2010] | 2gjk   |
| RecD                 | 6    | 0.51 | 642 | 55   | 12     | 7  | 48 | 5  | 582 | $1.32e^{-5}$  | 0.13 | 0.99 | 0.92 | 0.58 | [FWet al. 2010] | 1p4d   |
| UvrD/rep             | 8    | 0.53 | 661 | 62   | 18     | 8  | 54 | 10 | 589 | $7.95e^{-5}$  | 0.13 | 0.98 | 0.90 | 0.44 | [FWet al. 2010] | 2is1   |
| Rad3                 | 9    | 0.52 | 592 | 55   | 22     | 5  | 50 | 17 | 520 | 0.04          | 0.09 | 0.97 | 0.89 | 0.23 | [FWet al. 2010] | 3crv   |
| DEAD-box             | 67   | 0.61 | 624 | 66   | 4      | 4  | 62 | 0  | 558 | $1.15e^{-4}$  | 0.06 | 1    | 0.90 | 1    | [FWet al. 2010] | 3i5x   |
| RecQ                 | 9    | 0.61 | 514 | 65   | 47     | 18 | 47 | 29 | 420 | $1.92e^{-6}$  | 0.28 | 0.94 | 0.85 | 0.38 | [FWet al. 2010] | 2v1x   |
| Ski2-like            | 13   | 0.51 | 686 | 62   | 6      | 3  | 59 | 3  | 621 | 0.016         | 0.05 | 1    | 0.91 | 0.50 | [FWet al. 2010] | 2xgJ   |
| RigI-like            | 6    | 0.47 | 658 | 64   | 8      | 3  | 61 | 5  | 589 | 0.03          | 0.05 | 0.99 | 0.90 | 0.38 | [FWet al. 2010] | 1wp9   |
| DEAH-RHA             | 24   | 0.65 | 562 | 63   | 17     | 10 | 53 | 7  | 492 | $1.64e^{-6}$  | 0.16 | 0.99 | 0.89 | 0.59 | [FWet al. 2010] | 3kx2   |
| NS3-NPH-II           | 11   | 0.6  | 479 | 62   | 2      | 1  | 61 | 1  | 416 | 0.24          | 0.02 | 1    | 0.87 | 0.50 | [FWet al. 2010] | 1cu1   |
| Swi2-Snf2            | 45   | 0.51 | 714 | 76   | -      | -  | -  | -  | -   | -             | -    | -    | -    | -    | [FWet al. 2010] | 3dmq   |

Table 5: Validation of performance of coevolution analysis realized with SCA-DB.

See legend of Table 1-Text 10.

|                 | Size | API  | Pos | #Exp | SCA-TM | TP | FN | FP | TN  | Prob          | Sen* | Spe* | Acc* | PPV* | Alignment       | pdb    |
|-----------------|------|------|-----|------|--------|----|----|----|-----|---------------|------|------|------|------|-----------------|--------|
| Amyloid         | 80   | 0.87 | 43  | 25   | -      | -  | -  | -  | -   | -             | -    | -    | -    | -    | PFAM PF03494    | 1am1   |
|                 | 16   | 0.77 | 43  | 25   | -      | -  | -  | -  | -   | -             | -    | -    | -    | -    | -               | -      |
| MukB - Walker A | 200  | 0.84 | 234 | 8    | 8      | 7  | 1  | 1  | 225 | $9.16e^{-12}$ | 0.88 | 1    | 0.99 | 0.88 | PFAM PF04310    | 1qhl:A |
|                 | 205  | 0.81 | 274 | 8    | -      | -  | -  | -  | -   | -             | -    | -    | -    | -    | -               | -      |
|                 | 49   | 0.77 | 234 | 8    | 8      | 7  | 1  | 1  | 225 | $9.16e^{-12}$ | 0.88 | 1    | 0.99 | 0.88 | -               | -      |
|                 | 54   | 0.6  | 274 | 8    | -      | -  | -  | -  | -   | -             | -    | -    | -    | -    | -               | -      |
| Protein A       | 20   | 0.71 | 57  | 36   | -      | -  | -  | -  | -   | -             | -    | -    | -    | -    | PFAM PF02216    | 1bdd:A |
| B domain        | 28   | 0.6  | 62  | 36   | 5      | 3  | 33 | 2  | 24  | 0.65          | 0.08 | 0.92 | 0.44 | 0.60 | -               | -      |
|                 | 452  | 0.82 | 57  | 36   | 28     | 21 | 15 | 7  | 14  | $6.05e^{-2}$  | 0.58 | 0.67 | 0.61 | 0.75 | -               | -      |
|                 | 490  | 0.75 | 62  | 36   | 11     | 7  | 29 | 4  | 22  | 0.47          | 0.19 | 0.85 | 0.47 | 0.64 | -               | -      |
| Upf1            | 18   | 0.58 | 677 | 64   | 5      | 2  | 62 | 3  | 610 | 0.073         | 0.03 | 1    | 0.90 | 0.40 | [FWet al. 2010] | 2gjk   |
| RecD            | 6    | 0.51 | 642 | 55   | 10     | 6  | 49 | 4  | 583 | $4.88e^{-5}$  | 0.11 | 0.99 | 0.92 | 0.60 | [FWet al. 2010] | 1p4d   |
| UvrD/rep        | 8    | 0.53 | 661 | 62   | 16     | 8  | 54 | 8  | 591 | $2.73e^{-5}$  | 0.13 | 0.99 | 0.91 | 0.50 | [FWet al. 2010] | 2is1   |
| Rad3            | 9    | 0.52 | 592 | 55   | 7      | 1  | 54 | 6  | 531 | 0.50          | 0.02 | 0.99 | 0.90 | 0.14 | [FWet al. 2010] | 3crv   |
| DEAD-box        | 67   | 0.61 | 624 | 66   | 4      | 4  | 62 | 0  | 558 | $1.15e^{-4}$  | 0.06 | 1    | 0.90 | 1    | [FWet al. 2010] | 3i5x   |
| RecQ            | 9    | 0.61 | 514 | 65   | 47     | 18 | 47 | 29 | 420 | $1.92e^{-6}$  | 0.28 | 0.94 | 0.85 | 0.38 | [FWet al. 2010] | 2v1x   |
| Ski2-like       | 13   | 0.51 | 686 | 62   | 6      | 3  | 59 | 3  | 621 | 0.01          | 0.05 | 1    | 0.91 | 0.50 | [FWet al. 2010] | 2xgj   |
| RigI-like       | 6    | 0.47 | 658 | 64   | 8      | 3  | 61 | 5  | 589 | 0.03          | 0.05 | 0.99 | 0.90 | 0.38 | [FWet al. 2010] | 1wp9   |
| DEAH-RHA        | 24   | 0.65 | 562 | 63   | 13     | 8  | 55 | 5  | 494 | $1.34e^{-5}$  | 0.13 | 0.99 | 0.89 | 0.62 | [FWet al. 2010] | 3kx2   |
| NS3-NPH-II      | 11   | 0.6  | 479 | 62   | 2      | 1  | 61 | 1  | 416 | 0.24          | 0.02 | 1    | 0.87 | 0.50 | [FWet al. 2010] | 1cu1   |
| Swi2-Snf2       | 45   | 0.51 | 714 | 76   | -      | -  | -  | -  | -   | -             | -    | -    | -    | -    | [FWet al. 2010] | 3dmq   |

Table 6: Validation of performance of coevolution analysis realized with SCA-TM.

See legend of Table 1-Text 10.

|           | Size | API  | Pos | #Exp | ConSurf | TP | FN | FP | TN  | Prob          | Sen* | Spe* | Acc* | PPV* | Alignment               | pdb    |
|-----------|------|------|-----|------|---------|----|----|----|-----|---------------|------|------|------|------|-------------------------|--------|
| Amyloid   | 80   | 0.87 | 43  | 25   | 17      | 13 | 12 | 4  | 14  | $4.76e^{-2}$  | 0.52 | 0.78 | 0.63 | 0.76 | PFAM PF03494            | 1am1   |
| MUKB      | 200  | 0.84 | 234 | 8    | 106     | 8  | 0  | 98 | 128 | $1.53e^{-3}$  | 1    | 0.57 | 0.58 | 0.08 | PFAM PF04310            | 1qhl:A |
| PABD      | 52   | 0.82 | 57  | 36   | 26      | 22 | 14 | 4  | 17  | $2.13e^{-3}$  | 0.61 | 0.81 | 0.68 | 0.85 | PFAM PF02216            | 1bdd:A |
| UPF1      | 18   | 0.58 | 677 | 64   | 110     | 57 | 7  | 53 | 560 | $6.39e^{-44}$ | 0.89 | 0.91 | 0.91 | 0.52 | [FW <i>et al.</i> 2010] | 2gjk   |
| DEAD-box  | 67   | 0.61 | 624 | 66   | 110     | 66 | 0  | 44 | 514 | $6.95e^{-60}$ | 1    | 0.92 | 0.93 | 0.60 | [FW <i>et al.</i> 2010] | 315x   |
| Ski2-like | 13   | 0.51 | 686 | 62   | 134     | 62 | 0  | 72 | 552 | $7.85e^{-51}$ | 1    | 0.88 | 0.90 | 0.46 | [FW <i>et al.</i> 2010] | 2xgj   |

Table 7: Validation of performance of conservation analysis realized with ConSurf.  
See legend of Table 1-Text 10.



|           | Size | API  | Pos | #Exp | E/T | TP | FN | FP  | TN  | Prob          | Sen* | Spe* | Acc* | PPV* | Alignment               | pdb    |
|-----------|------|------|-----|------|-----|----|----|-----|-----|---------------|------|------|------|------|-------------------------|--------|
| Amyloid   | 80   | 0.87 | 43  | 25   | 16  | 13 | 12 | 3   | 15  | $1.88e^{-2}$  | 0.52 | 0.83 | 0.65 | 0.81 | PFAM PF03494            | 1am1   |
| MUKB      | 200  | 0.84 | 234 | 8    | 109 | 8  | 0  | 101 | 125 | $1.92e^{-3}$  | 1    | 0.55 | 0.57 | 0.07 | PFAM PF04310            | 1qtl:A |
| PABD      | 452  | 0.82 | 57  | 36   | 37  | 26 | 10 | 11  | 10  | 0.11          | 0.72 | 0.48 | 0.63 | 0.70 | PFAM PF02216            | 1bdd:A |
| UPF1      | 18   | 0.58 | 677 | 64   | 135 | 54 | 10 | 81  | 532 | $2.19e^{-32}$ | 0.84 | 0.87 | 0.87 | 0.40 | [FW <i>et al.</i> 2010] | 2gjk   |
| Ski2-like | 13   | 0.51 | 686 | 62   | 196 | 62 | 0  | 134 | 490 | $6.16e^{-38}$ | 1    | 0.79 | 0.80 | 0.32 | [FW <i>et al.</i> 2010] | 2xgj   |

Table 8: Validation of performance of conservation analysis realized with ET.

See legend of Table 1-Text 10.

|            | Size | API  | Pos | #Exp | Rate4Site | TP | FN | FP | TN  | Prob          | Sen* | Spe* | Acc* | PPV* | Alignment               | pdb    |
|------------|------|------|-----|------|-----------|----|----|----|-----|---------------|------|------|------|------|-------------------------|--------|
| Amyloid    | 80   | 0.87 | 43  | 25   | 26        | 21 | 4  | 5  | 13  | $2.75e^{-4}$  | 0.84 | 0.72 | 0.79 | 0.81 | PFAM PF03494            | 1qhl:A |
| MUKB       | 200  | 0.84 | 234 | 8    | 83        | 7  | 1  | 76 | 150 | $3.37e^{-3}$  | 0.88 | 0.66 | 0.67 | 0.08 | PFAM PF04310            | 1qhl:A |
| PABD       | 452  | 0.82 | 57  | 36   | 0         | 0  | 36 | 0  | 21  | 1             | 0    | 1    | 0.63 | 0    | PFAM PF02216            | 1bdd:A |
| UPF1       | 18   | 0.58 | 677 | 64   | 23        | 13 | 51 | 10 | 603 | $7.96e^{-9}$  | 0.20 | 0.98 | 0.91 | 0.57 | [FW <i>et al.</i> 2010] | 2gjk   |
| RECD       | 6    | 0.51 | 642 | 55   | 5         | 3  | 52 | 2  | 585 | 0.005         | 0.05 | 1    | 0.92 | 0.60 | [FW <i>et al.</i> 2010] | 1p4d   |
| UvrD/rep   | 8    | 0.53 | 661 | 62   | 29        | 10 | 52 | 19 | 580 | $1.24e^{-4}$  | 0.16 | 0.97 | 0.89 | 0.34 | [FW <i>et al.</i> 2010] | 21s1   |
| Rad3       | 9    | 0.52 | 592 | 55   | 2         | 0  | 55 | 2  | 535 | 1             | 0    | 1    | 0.90 | 0    | [FW <i>et al.</i> 2010] | 3crv   |
| DEAD-box   | 67   | 0.61 | 624 | 66   | 33        | 15 | 51 | 18 | 540 | $1.15e^{-7}$  | 0.23 | 0.97 | 0.89 | 0.45 | [FW <i>et al.</i> 2010] | 3i5x   |
| RecQ       | 9    | 0.61 | 514 | 65   | 24        | 20 | 45 | 4  | 445 | $4.47e^{-16}$ | 0.31 | 0.99 | 0.90 | 0.83 | [FW <i>et al.</i> 2010] | 2v1x   |
| Ski2-like  | 13   | 0.51 | 686 | 62   | 36        | 20 | 42 | 16 | 608 | $1.49e^{-13}$ | 0.32 | 0.97 | 0.92 | 0.56 | [FW <i>et al.</i> 2010] | 2xgj   |
| RigI-like  | 6    | 0.47 | 658 | 64   | 8         | 5  | 59 | 3  | 591 | $3.33e^{-4}$  | 0.08 | 0.99 | 0.91 | 0.63 | [FW <i>et al.</i> 2010] | 1wp9   |
| DEAH-RHA   | 24   | 0.65 | 562 | 63   | 41        | 26 | 37 | 15 | 484 | $1.86e^{-17}$ | 0.41 | 0.97 | 0.91 | 0.63 | [FW <i>et al.</i> 2010] | 3kx2   |
| NS3-NPH-II | 11   | 0.6  | 479 | 62   | 9         | 7  | 55 | 2  | 415 | $1.30e^{-5}$  | 0.11 | 1    | 0.88 | 0.78 | [FW <i>et al.</i> 2010] | 1cu1   |
| Swi2-Snf2  | 45   | 0.51 | 714 | 76   | 34        | 22 | 54 | 12 | 626 | $4.02e^{-15}$ | 0.29 | 0.98 | 0.91 | 0.65 | [FW <i>et al.</i> 2010] | 3dmq   |

Table 9: Validation of performance of conservation analysis realized with Rate4Site.  
See legend of Table 1-Text 10.
