# Supplementary material for: Protein Fragments: Functional and Structural Roles of Their Coevolution Networks
Source: PubMed Central journal article supplement (PMC3489791; doi:10.1371/journal.pone.0048124), 2012-11-05
Supplement: pone.0048124.s013.pdf [file pone.0048124.s013.pdf]

Supporting Information Text S11:  
conservation analysis of the protein families  
analyzed in the article

| Conservation analysis of Amyloid - 80 sequences |                                                                               |
|-------------------------------------------------|-------------------------------------------------------------------------------|
| Method                                          | List of conserved residues                                                    |
| Rate4Site                                       | 11 12 14 16 17 18 19 21 23 26 27 28 29 30 31 32 33 34 35 36 37 38 39 40 41 42 |
| ConSurf                                         | 12 17 19 26 27 28 29 30 31 32 33 34 35 36 37 38 40                            |
| ET                                              | 17 19 26 27 28 29 30 31 32 33 34 35 36 37 38 40                               |

Table 1: **Conservation analysis for the Amyloid set of 80 sequences.**

List of residues resulting from the conservation analysis of the protein family realized with Rate4Site (score of conserved positions  $\leq 0.12$ ), ConSurf (conserved residues have rank 8 and 9) and ET methods.

| Conservation analysis of MukB - 200 sequences |                                                                                                                                                                                                                                                                                                                                                                                                         |
|-----------------------------------------------|---------------------------------------------------------------------------------------------------------------------------------------------------------------------------------------------------------------------------------------------------------------------------------------------------------------------------------------------------------------------------------------------------------|
| Method                                        | List of conserved residues                                                                                                                                                                                                                                                                                                                                                                              |
| Rate4Site                                     | 1 4 6 9 11 14 16 17 18 19 20 22 23 26 29 30 31 32 33 34 35 36 37 39 40 41<br>42 44 45 52 53 54 57 58 60 61 62 63 64 65 66 67 72 73 74 76 77 79 80<br>81 84 94 95 99 108 112 113 115 116 121 175 179 182 189 193 194 200<br>202 203 204 205 207 208 209 210 213 216 217 218 221 222 223 225                                                                                                              |
| ConSurf                                       | 4 5 6 9 11 14 15 16 17 18 19 20 21 22 23 24 26 29 30 31 32 33 34 35 36<br>37 38 39 40 41 42 44 45 48 49 50 51 52 53 54 55 57 58 77 79 80 81 84 86<br>87 90 94 95 98 99 104 106 107 108 110 111 112 113 115 116 117 121 133<br>145 147 154 170 175 179 182 187 188 189 193 194 196 198 199 200 201<br>202 203 204 205 206 207 208 209 210 211 213 214 216 217 218 219 220<br>221 222 223 225             |
| ET                                            | 4 5 6 9 10 11 14 15 16 17 18 19 20 21 22 23 24 26 28 29 30 31 32 33 34 35<br>36 37 38 39 40 41 42 44 45 47 49 51 52 53 54 57 58 77 79 80 81 84 86 87<br>90 94 95 98 99 106 107 108 110 111 112 113 115 116 117 121 145 146 147<br>154 165 166 170 173 174 175 178 179 182 188 189 193 194 196 197 198<br>200 201 202 203 204 205 206 207 208 209 210 211 213 214 216 217 218<br>219 220 221 222 223 225 |

Table 2: **Conservation analysis for the MukB set of 200 sequences.**

List of residues resulting from the conservation analysis of the protein family realized with Rate4Site (score of conserved positions  $\leq 0.12$ ), ConSurf (conserved residues have rank 8 and 9) and ET methods.

| Conservation analysis of Protein A - B domain - 452 sequences |                                                                                                                   |
|---------------------------------------------------------------|-------------------------------------------------------------------------------------------------------------------|
| Method                                                        | List of conserved residues                                                                                        |
| Rate4Site                                                     | no residues                                                                                                       |
| ConSurf                                                       | 11 13 14 15 18 22 23 27 29 30 31 32 33 34 35 36 37 38 39 40 42 46 48 49 51 52                                     |
| ET                                                            | 10 11 13 14 15 18 21 22 23 24 27 28 29 31 32 33 34 35 36 37 38 39 40 41 42 44<br>46 48 49 50 51 52 53 56 57 58 59 |

Table 3: **Conservation analysis for the Protein A - B domain set of 452 sequences.**

List of residues resulting from the conservation analysis of the protein family realized with Rate4Site (score of conserved positions  $\leq 0.12$ ), ConSurf (conserved residues have rank 8 and 9) and ET methods.

| Conservation analysis of Upf1 - 18 sequences |                                                                                                                                                                                                                                                                                                                                                                                                                                                                                                                                                                                                            |
|----------------------------------------------|------------------------------------------------------------------------------------------------------------------------------------------------------------------------------------------------------------------------------------------------------------------------------------------------------------------------------------------------------------------------------------------------------------------------------------------------------------------------------------------------------------------------------------------------------------------------------------------------------------|
| Method                                       | List of conserved residues                                                                                                                                                                                                                                                                                                                                                                                                                                                                                                                                                                                 |
| Rate4Site                                    | 475 478 496 498 499 543 614 634 635 660 663 664 696<br>701 764 767 797 828 838 840 859 862 863                                                                                                                                                                                                                                                                                                                                                                                                                                                                                                             |
| ConSurf                                      | 471 472 474 475 478 490 492 493 494 495 496 497 498<br>499 501 505 506 517 518 521 522 523 524 526 527 528 543<br>612 613 616 633 634 636 637 638 640 643 649 650 658 659<br>660 661 662 663 665 666 667 668 675 680 683 684 687 698<br>701 702 703 704 705 708 713 717 721 745 753 763 766 769<br>770 773 790 791 792 793 794 795 796 799 800 823 825 826<br>827 829 830 831 833 837 838 840 842 843 844 845 851 852<br>853 855 858 860 861 862 864 865 866 867 874 875 879                                                                                                                               |
| ET                                           | 471 472 474 475 478 488 489 490 491 492 493 494 495 496<br>497 498 499 501 502 518 519 521 522 523 524 526 527 528<br>530 543 549 550 559 561 562 603 614 616 617 620 622 624<br>625 630 634 636 637 640 643 644 645 649 661 662 663 665<br>666 667 668 679 680 683 684 685 686 687 688 695 697 698<br>701 702 703 704 706 708 711 713 716 717 719 721 723 724<br>739 745 748 753 755 756 761 763 765 766 769 770 774 790<br>791 794 795 796 797 798 799 800 802 818 825 826 827 829<br>830 831 832 833 834 835 837 841 842 843 845 850 851 852<br>853 857 858 859 860 861 864 865 866 869 874 877 880 891 |

Table 4: Conservation analysis for the Upf1 set of 18 sequences.

List of residues resulting from the conservation analysis of the protein family realized with Rate4Site (score of conserved positions  $\leq 0.12$ ), ConSurf (conserved residues have rank 8 and 9) and ET methods.

| Conservation analysis of Ski2-like - 13 sequences |                                                                                                                                                                                                                                                                                                                                                                                                                                                                                                                                                                                                                                                                                                                                                                                                                                                                |
|---------------------------------------------------|----------------------------------------------------------------------------------------------------------------------------------------------------------------------------------------------------------------------------------------------------------------------------------------------------------------------------------------------------------------------------------------------------------------------------------------------------------------------------------------------------------------------------------------------------------------------------------------------------------------------------------------------------------------------------------------------------------------------------------------------------------------------------------------------------------------------------------------------------------------|
| Method                                            | List of conserved residues                                                                                                                                                                                                                                                                                                                                                                                                                                                                                                                                                                                                                                                                                                                                                                                                                                     |
| Rate4Site                                         | 173 174 176 177 178 200 203 239 262 263 265 272 293 294<br>295 298 421 469 473 474 482 486 500 502 504 506 508 514 537<br>538 540 541 542 543 544 548                                                                                                                                                                                                                                                                                                                                                                                                                                                                                                                                                                                                                                                                                                          |
| ConSurf                                           | 151 154 166 169 170 171 172 173 174 175 176 177 178 180 181<br>182 183 185 196 197 198 199 200 202 203 204 205 206 207 216<br>219 222 223 224 225 238 239 241 242 248 253 254 256 260 261<br>262 263 264 265 267 269 272 273 274 276 277 280 282 283 288<br>290 292 293 294 295 296 297 298 301 302 303 305 306 408 410<br>411 412 413 415 416 419 423 468 471 472 473 475 476 477 478<br>479 483 484 487 488 490 491 494 497 498 499 501 502 503 504<br>505 506 508 509 510 511 512 513 514 515 516 517 518 519 520<br>536 539 540 541 542 543 544 545 546 547 550 553 555 556                                                                                                                                                                                                                                                                                |
| ET                                                | 143 148 150 151 153 154 166 167 168 169 171 172 173 174 175 176<br>177 178 181 182 183 184 185 195 196 197 198 199 200 201 202<br>203 204 205 206 207 208 209 210 211 216 218 219 220 221 223<br>224 225 228 229 232 234 235 236 237 238 239 240 241 242 243<br>244 245 246 247 249 250 256 259 261 262 263 265 266 267 269<br>272 273 274 275 276 277 278 280 281 283 284 287 292 293 294<br>295 296 297 298 302 303 305 306 310 312 318 319 322 323 324<br>325 326 408 409 410 412 414 415 416 419 420 423 436 451 455<br>460 467 468 470 471 473 475 476 477 478 479 480 481 482 484<br>485 487 488 490 491 494 495 497 499 500 501 502 503 504 505<br>506 508 510 511 512 513 514 515 516 517 518 519 523 525 526<br>530 535 536 537 539 540 542 543 544 545 546 547 548 550 553<br>555 556 577 579 581 583 585 587 588 589 591 592 593 595 597<br>342 348 |

Table 5: Conservation analysis for the Ski2-like set of 13 sequences.

List of residues resulting from the conservation analysis of the protein family realized with Rate4Site (score of conserved positions  $\leq 0.12$ ), ConSurf (conserved residues have rank 8 and 9) and ET methods.
