# Supplementary material for: Protein Fragments: Functional and Structural Roles of Their Coevolution Networks
Source: PubMed Central journal article supplement (PMC3489791; doi:10.1371/journal.pone.0048124), 2012-11-05
Supplement: pone.0048124.s014.pdf [file pone.0048124.s014.pdf]

Supporting Information Text S12:  
comparison between  
BIS analysis based on exceptions  
and  
BIS analysis on all hits

| Family     | Properties   |      |      | Block analysis with exceptions |         |          |                    |     |     | Block analysis with all hits |          |                    |     |     |
|------------|--------------|------|------|--------------------------------|---------|----------|--------------------|-----|-----|------------------------------|----------|--------------------|-----|-----|
|            | Align length | %id  | #seq | #exc                           | pos cov | # blocks | average block size | min | max | pos cov                      | # blocks | average block size | min | max |
| Amyloid    | 43           | 0.87 | 80   | 0                              | 30      | 17       | 2.94               | 1   | 14  | 39                           | 24       | 3.42               | 1   | 17  |
|            |              |      |      | 1                              | 14      | 6        | 2.5                | 1   | 7   |                              |          |                    |     |     |
|            |              |      |      | 2                              | 17      | 1        | 17                 | 17  | 17  |                              |          |                    |     |     |
| MUKB       | 234          | 0.84 | 200  | 0                              | 27      | 14       | 2.14               | 1   | 7   | 227                          | 176      | 2.26               | 1   | 11  |
|            |              |      |      | 1                              | 167     | 107      | 2.45               | 1   | 11  |                              |          |                    |     |     |
|            |              |      |      | 2                              | 69      | 37       | 2.24               | 1   | 11  |                              |          |                    |     |     |
| PABD       | 57           | 0.82 | 452  | 0                              | 37      | 24       | 3.25               | 1   | 16  | 53                           | 37       | 3.08               | 1   | 16  |
|            |              |      |      | 1                              | 21      | 12       | 2.83               | 1   | 6   |                              |          |                    |     |     |
|            |              |      |      | 2                              | 2       | 1        | 2                  | 2   | 2   |                              |          |                    |     |     |
| UPF1       | 677          | 0.58 | 18   | 0                              | 41      | 37       | 1.27               | 1   | 3   | 399                          | 395      | 1.13               | 1   | 5   |
|            |              |      |      | 1                              | 67      | 56       | 1.196              | 1   | 4   |                              |          |                    |     |     |
|            |              |      |      | 2                              | 63      | 56       | 1.143              | 1   | 5   |                              |          |                    |     |     |
| RECD       | 642          | 0.51 | 6    | 0                              | 41      | 33       | 1.45               | 1   | 6   | 343                          | 316      | 1.49               | 1   | 9   |
|            |              |      |      | 1                              | 59      | 51       | 1.157              | 1   | 3   |                              |          |                    |     |     |
|            |              |      |      | 2                              | 117     | 87       | 1.41               | 1   | 7   |                              |          |                    |     |     |
| UvrD/rep   | 661          | 0.53 | 8    | 0                              | 34      | 27       | 1.59               | 1   | 5   | 346                          | 332      | 1.33               | 1   | 5   |
|            |              |      |      | 1                              | 52      | 40       | 1.375              | 1   | 4   |                              |          |                    |     |     |
|            |              |      |      | 2                              | 59      | 54       | 1.13               | 1   | 5   |                              |          |                    |     |     |
| Rad3       | 592          | 0.52 | 9    | 0                              | 55      | 50       | 1.26               | 1   | 3   | 454                          | 438      | 1.80               | 1   | 36  |
|            |              |      |      | 1                              | 78      | 68       | 1.176              | 1   | 4   |                              |          |                    |     |     |
|            |              |      |      | 2                              | 136     | 110      | 1.25               | 1   | 5   |                              |          |                    |     |     |
| DEAD-box   | 624          | 0.61 | 67   | 0                              | 44      | 41       | 1.22               | 1   | 3   | 430                          | 427      | 1.07               | 1   | 4   |
|            |              |      |      | 1                              | 65      | 57       | 1.21               | 1   | 4   |                              |          |                    |     |     |
|            |              |      |      | 2                              | 71      | 66       | 1.076              | 1   | 4   |                              |          |                    |     |     |
| RecQ       | 514          | 0.61 | 9    | 0                              | 39      | 33       | 1.36               | 1   | 4   | 349                          | 337      | 1.39               | 1   | 20  |
|            |              |      |      | 1                              | 57      | 42       | 1.45               | 1   | 5   |                              |          |                    |     |     |
|            |              |      |      | 2                              | 103     | 76       | 1.37               | 1   | 6   |                              |          |                    |     |     |
| Ski2-like  | 686          | 0.51 | 13   | 0                              | 48      | 40       | 1.625              | 1   | 6   | 426                          | 417      | 1.16               | 1   | 6   |
|            |              |      |      | 1                              | 78      | 66       | 1.21               | 1   | 4   |                              |          |                    |     |     |
|            |              |      |      | 2                              | 62      | 54       | 1.19               | 1   | 4   |                              |          |                    |     |     |
| RigI-like  | 658          | 0.47 | 6    | 0                              | 68      | 58       | 1.43               | 1   | 4   | 451                          | 425      | 1.41               | 1   | 6   |
|            |              |      |      | 1                              | 65      | 52       | 1.27               | 1   | 3   |                              |          |                    |     |     |
|            |              |      |      | 2                              | 125     | 104      | 1.26               | 1   | 6   |                              |          |                    |     |     |
| DEAH-RHA   | 562          | 0.65 | 24   | 0                              | 45      | 42       | 1.21               | 1   | 4   | 409                          | 404      | 1.17               | 1   | 4   |
|            |              |      |      | 1                              | 92      | 73       | 1.47               | 1   | 4   |                              |          |                    |     |     |
|            |              |      |      | 2                              | 88      | 74       | 1.24               | 1   | 4   |                              |          |                    |     |     |
| NS3-NPH-II | 479          | 0.6  | 11   | 0                              | 90      | 83       | 1.53               | 1   | 5   | 365                          | 353      | 1.38               | 1   | 9   |
|            |              |      |      | 1                              | 96      | 84       | 1.15               | 1   | 4   |                              |          |                    |     |     |
|            |              |      |      | 2                              | 114     | 91       | 1.29               | 1   | 6   |                              |          |                    |     |     |
| Swi2-Snf2  | 714          | 0.51 | 45   | 0                              | 24      | 21       | 1.19               | 1   | 3   | 522                          | 519      | 1.04               | 1   | 5   |
|            |              |      |      | 1                              | 50      | 45       | 1.2                | 1   | 5   |                              |          |                    |     |     |
|            |              |      |      | 2                              | 87      | 83       | 1.05               | 1   | 3   |                              |          |                    |     |     |

Table 1: **Properties of BIS analysis based on exceptions and based on all hits.**

Summary of BIS analysis when realized 1. for different numbers of exceptions (# exc), that is 0, 1 or 2 (columns 5 through 10), and 2. by considering all alignment positions as hits independently on exceptions (last five columns from the right). For each protein family, the alignment length where all gapped positions are excluded (Align length), the sequence identity (%id) and the number of sequences (#seq) are reported. For each analysis, the number of alignment positions retained as hit (pos cov), the number of blocks (#blocks), the average size for a block (average block size), the minimal (min) and maximal (max) size of a block are reported. Notice that for the second analysis (on all hits), the number of positions considered as hits corresponds to all positions in the alignment with the exclusion of those positions that contain more than 60% of gaps.

| Family     | Properties   |      |      | Block analysis with exceptions |         |          |                    |     |     |
|------------|--------------|------|------|--------------------------------|---------|----------|--------------------|-----|-----|
|            | Align length | %id  | #seq | #exc                           | pos cov | # blocks | average block size | min | max |
| Amyloid    | 43           | 0.87 | 80   | 0                              | 30      | 17       | 2.94               | 1   | 14  |
|            |              |      |      | 0 1                            | 38      | 23       | 2.83               | 1   | 14  |
|            |              |      |      | 0 1 2                          | 39      | 24       | 3.42               | 1   | 17  |
| MUKB       | 234          | 0.84 | 200  | 0                              | 27      | 14       | 2.14               | 1   | 7   |
|            |              |      |      | 0 1                            | 172     | 121      | 2.41               | 1   | 11  |
|            |              |      |      | 0 1 2                          | 209     | 158      | 2.37               | 1   | 11  |
| PABD       | 57           | 0.82 | 452  | 0                              | 37      | 24       | 3.25               | 1   | 16  |
|            |              |      |      | 0 1                            | 52      | 36       | 3.11               | 1   | 16  |
|            |              |      |      | 0 1 2                          | 53      | 37       | 3.08               | 1   | 16  |
| UPF1       | 677          | 0.58 | 18   | 0                              | 41      | 37       | 1.27               | 1   | 3   |
|            |              |      |      | 0 1                            | 97      | 93       | 1.26               | 1   | 4   |
|            |              |      |      | 0 1 2                          | 153     | 149      | 1.19               | 1   | 5   |
| RECD       | 642          | 0.51 | 6    | 0                              | 41      | 33       | 1.45               | 1   | 6   |
|            |              |      |      | 0 1                            | 92      | 84       | 1.27               | 1   | 6   |
|            |              |      |      | 0 1 2                          | 180     | 171      | 1.36               | 1   | 7   |
| UvrD/rep   | 661          | 0.53 | 8    | 0                              | 34      | 27       | 1.59               | 1   | 5   |
|            |              |      |      | 0 1                            | 75      | 67       | 1.46               | 1   | 5   |
|            |              |      |      | 0 1 2                          | 129     | 121      | 1.31               | 1   | 5   |
| Rad3       | 592          | 0.52 | 9    | 0                              | 55      | 50       | 1.34               | 1   | 4   |
|            |              |      |      | 0 1                            | 123     | 118      | 1.25               | 1   | 4   |
|            |              |      |      | 0 1 2                          | 234     | 227      | 1.26               | 1   | 5   |
| DEAD-box   | 624          | 0.61 | 67   | 0                              | 44      | 41       | 1.22               | 1   | 3   |
|            |              |      |      | 0 1                            | 101     | 98       | 1.21               | 1   | 4   |
|            |              |      |      | 0 1 2                          | 167     | 164      | 1.16               | 1   | 4   |
| RecQ       | 514          | 0.61 | 9    | 0                              | 39      | 33       | 1.36               | 1   | 4   |
|            |              |      |      | 0 1                            | 83      | 75       | 1.41               | 1   | 5   |
|            |              |      |      | 0 1 2                          | 162     | 151      | 1.40               | 1   | 6   |
| Ski2-like  | 686          | 0.51 | 13   | 0                              | 48      | 40       | 1.62               | 1   | 6   |
|            |              |      |      | 0 1                            | 115     | 106      | 1.37               | 1   | 6   |
|            |              |      |      | 0 1 2                          | 169     | 160      | 1.31               | 1   | 6   |
| RigI-like  | 658          | 0.47 | 6    | 0                              | 68      | 58       | 1.43               | 1   | 4   |
|            |              |      |      | 0 1                            | 121     | 110      | 1.35               | 1   | 4   |
|            |              |      |      | 0 1 2                          | 227     | 213      | 1.31               | 1   | 6   |
| DEAH-RHA   | 562          | 0.65 | 24   | 0                              | 45      | 42       | 1.21               | 1   | 4   |
|            |              |      |      | 0 1                            | 120     | 115      | 1.37               | 1   | 4   |
|            |              |      |      | 0 1 2                          | 194     | 189      | 1.32               | 1   | 4   |
| NS3-NPH-II | 479          | 0.6  | 11   | 0                              | 90      | 83       | 1.53               | 1   | 5   |
|            |              |      |      | 0 1                            | 174     | 167      | 1.34               | 1   | 5   |
|            |              |      |      | 0 1 2                          | 268     | 258      | 1.33               | 1   | 6   |
| Swi2-Snf2  | 714          | 0.51 | 45   | 0                              | 24      | 21       | 1.19               | 1   | 3   |
|            |              |      |      | 0 1                            | 69      | 66       | 1.20               | 1   | 5   |
|            |              |      |      | 0 1 2                          | 152     | 149      | 1.11               | 1   | 5   |

Table 2: **Properties of BIS analysis based on exceptions and based on all hits (cont'd).**

Summary of BIS analysis when realized for different numbers of exceptions (# exc), that is 0, 1 or 2, as in Table 1-Text S12. Here, for each protein family we consider a number of positions and of blocks that is cumulated with respect to the number of allowed exceptions. Namely, we count the number of positions/blocks for a number of exceptions  $d$  that is 0,  $\leq 1$  (0 1) or  $\leq 2$  (0 1 2).
