# Supplementary material for: Protein Fragments: Functional and Structural Roles of Their Coevolution Networks
Source: PubMed Central journal article supplement (PMC3489791; doi:10.1371/journal.pone.0048124), 2012-11-05
Supplement: pone.0048124.s017.pdf [file pone.0048124.s017.pdf]

Supporting Information Text S15:  
mapping between PDB positions and  
alignment positions

| Matrix rank | PDB   | Alignment |
|-------------|-------|-----------|
| 1           | 1     | 3         |
| 2           | 4     | 6         |
| 3           | 4-6   | 6-8       |
| 4           | 6-7   | 8-9       |
| 5           | 6     | 8         |
| 6           | 9     | 11        |
| 7           | 11    | 13        |
| 8           | 12    | 14        |
| 9           | 14-20 | 16-22     |
| 10          | 22-23 | 24-25     |
| 11          | 26    | 28        |
| 12          | 34-37 | 36-39     |
| 13          | 39-42 | 41-44     |
| 14          | 144   | 146       |

**Table 1: MukB protein: BIS environment for  $d = 0$  on the dataset of 200 sequences.**

List of blocks defined for  $d = 0$  over which the correlated distribution score matrix analysis is computed. Blocks are identified by the starting and ending positions if they are composed by several amino-acids, or by one single position otherwise. Positions are given for the PDB file (second column) and for the PFAM sequence alignment (third column). The matrix rank corresponds to the line in the correlated distribution score matrix starting from the bottom up to the top in Fig. 2B in the main text.

| Matrix rank | PDB    | Alignment | Matrix rank | PDB     | Alignment | Matrix rank | PDB     | Alignment |
|-------------|--------|-----------|-------------|---------|-----------|-------------|---------|-----------|
| 1           | 2      | 4         | 37          | 101     | 103       | 73          | 170     | 172       |
| 2           | 6-9    | 8-11      | 38          | 104     | 106       | 74          | 171     | 173       |
| 3           | 10-11  | 12/13/11  | 39          | 105     | 107       | 75          | 173     | 175       |
| 4           | 13-20  | 15-22     | 40          | 107-108 | 109-110   | 76          | 174-175 | 176-177   |
| 5           | 14-23  | 250       | 41          | 108-109 | 109-111   | 77          | 175     | 177       |
| 6           | 22-24  | 24-26     | 42          | 108     | 110       | 78          | 175-176 | 177-178   |
| 7           | 25-26  | 27-28     | 43          | 111-117 | 113-119   | 79          | 178-179 | 180-181   |
| 8           | 28-33  | 30-35     | 44          | 111-113 | 113-115   | 80          | 179-180 | 181-182   |
| 9           | 29-33  | 31-35     | 45          | 112-113 | 114-115   | 81          | 179     | 181       |
| 10          | 34-42  | 36-44     | 46          | 115-116 | 117-118   | 82          | 181-182 | 183-184   |
| 11          | 44-45  | 46-47     | 47          | 115-117 | 117-119   | 83          | 182     | 184       |
| 12          | 48     | 50        | 48          | 118     | 120       | 84          | 184     | 186       |
| 13          | 49     | 51        | 49          | 119     | 121       | 85          | 185     | 187       |
| 14          | 50     | 52        | 50          | 120-121 | 122-123   | 86          | 186     | 188       |
| 15          | 51-54  | 55-56     | 51          | 121     | 123       | 87          | 187     | 189       |
| 16          | 52-55  | 54-57     | 52          | 125     | 127       | 88          | 189-190 | 191-192   |
| 17          | 52-54  | 54-56     | 53          | 126     | 128       | 89          | 189     | 191       |
| 18          | 56-58  | 58-60     | 54          | 132-133 | 134-135   | 90          | 191     | 193       |
| 19          | 57-58  | 59-60     | 55          | 133     | 135       | 91          | 193-194 | 195-196   |
| 20          | 57-67  | 59-69     | 56          | 136     | 138       | 92          | 197-198 | 199-200   |
| 21          | 60-68  | 62-70     | 57          | 137     | 139       | 93          | 198-200 | 200-202   |
| 22          | 60-67  | 62-69     | 58          | 141     | 143       | 94          | 198     | 200       |
| 23          | 69     | 71        | 59          | 145     | 147       | 95          | 200     | 202       |
| 24          | 71-74  | 73-76     | 60          | 146     | 148       | 96          | 202-210 | 204-212   |
| 25          | 72-74  | 74-76     | 61          | 147     | 149       | 97          | 212-214 | 214-216   |
| 26          | 76-77  | 78-79     | 62          | 148     | 150       | 98          | 213-214 | 215-216   |
| 27          | 76-81  | 78-83     | 63          | 149     | 151       | 99          | 213     | 215       |
| 28          | 79-82  | 81-84     | 64          | 150     | 152       | 100         | 215-218 | 217-220   |
| 29          | 79-81  | 81-83     | 65          | 152     | 154       | 101         | 216-223 | 218-225   |
| 30          | 84     | 86        | 66          | 153     | 155       | 102         | 216-218 | 218-220   |
| 31          | 86-87  | 88-89     | 67          | 157     | 159       | 103         | 220-223 | 222-225   |
| 32          | 91     | 93        | 68          | 158     | 160       | 104         | 220-225 | 222-227   |
| 33          | 94-95  | 96-97     | 69          | 160     | 162       | 105         | 225     | 227       |
| 34          | 98-99  | 100-101   | 70          | 162     | 164       | 106         | 226     | 228       |
| 35          | 98-100 | 100-102   | 71          | 163     | 165       | 107         | 227     | 229       |
| 36          | 99     | 101       | 72          | 168     | 170       |             |         |           |

Table 2: **MukB protein: BIS environment for  $d = 1$  on the dataset of 200 sequences.**

List of blocks defined for  $d = 1$  over which the correlated distribution score matrix is computed. Blocks are identified by the starting and ending positions if they are composed by several amino-acids, or by one single position otherwise. Positions are given for the PDB file (second column) and for the PFAM sequence alignment (third column).

| Amino acid | Alignment | PDB |
|------------|-----------|-----|
| Q          | 34        | 475 |
| A          | 37        | 478 |
| G          | 70        | 492 |
| G          | 73        | 495 |
| G          | 75        | 497 |
| K          | 76        | 498 |
| L          | 125       | 518 |
| R          | 168       | 543 |
| T          | 213       | 616 |
| E          | 257       | 637 |
| G          | 315       | 661 |
| D          | 316       | 662 |
| L          | 417       | 698 |
| R          | 422       | 703 |
| Y          | 436       | 717 |
| N          | 513       | 766 |
| Y          | 554       | 796 |
| Q          | 557       | 799 |
| Q          | 708       | 830 |
| G          | 709       | 831 |
| G          | 786       | 851 |
| R          | 801       | 865 |

Table 3: **AATPase Upf1: mapping between structural and sequence positions of co-evolving amino-acids.**

Co-evolving residues clustered by BIS analysis of Upf1 are described through structural positions (used in Fig. 5A in the main text; pdb structure 2gjk) and alignment positions (used in Fig. 5B in the main text). Notice that alignment positions refer to the alignment given in (Fairman-Williams et al. 2010).

| Amyloid<br>12 sequences |        |     |
|-------------------------|--------|-----|
| Res                     | Al pos | PDB |
| F                       | 4      | 4   |
| R                       | 5      | 5   |
| H                       | 6      | 6   |
| D                       | 7      | 7   |
| S                       | 8      | 8   |
| G                       | 9      | 9   |
| Y                       | 10     | 10  |
| E                       | 11     | 11  |
| V                       | 12     | 12  |
| H                       | 13     | 13  |
| H                       | 14     | 14  |
| Q                       | 15     | 15  |
| K                       | 16     | 16  |
| L                       | 17     | 17  |
| V                       | 18     | 18  |
| F                       | 19     | 19  |
| F                       | 20     | 20  |
| A                       | 21     | 21  |
| E                       | 22     | 22  |
| D                       | 23     | 23  |
| V                       | 24     | 24  |
| G                       | 25     | 25  |
| S                       | 26     | 26  |
| N                       | 27     | 27  |
| K                       | 28     | 28  |
| G                       | 29     | 29  |
| A                       | 30     | 30  |
| I                       | 31     | 31  |
| I                       | 32     | 32  |
| G                       | 33     | 33  |
| L                       | 34     | 34  |
| M                       | 35     | 35  |
| V                       | 36     | 36  |
| G                       | 37     | 37  |
| G                       | 38     | 38  |
| V                       | 39     | 39  |
| V                       | 40     | 40  |
| I                       | 41     | 41  |
| A                       | 42     | 42  |

Table 4: **Alignment vs PDB residue mapping for the Amyloid set of 12 sequences.**

Correspondence between alignment positions (Al pos) and PDB positions (PDB). The residue (Res) corresponding to a given position is also reported.

| Amyloid<br>80 sequences |        |     |
|-------------------------|--------|-----|
| Res                     | Al pos | PDB |
| F                       | 4      | 4   |
| R                       | 5      | 5   |
| H                       | 6      | 6   |
| D                       | 7      | 7   |
| S                       | 8      | 8   |
| G                       | 9      | 9   |
| Y                       | 10     | 10  |
| E                       | 11     | 11  |
| V                       | 12     | 12  |
| H                       | 13     | 13  |
| H                       | 14     | 14  |
| Q                       | 15     | 15  |
| K                       | 16     | 16  |
| L                       | 17     | 17  |
| V                       | 18     | 18  |
| F                       | 19     | 19  |
| F                       | 20     | 20  |
| A                       | 21     | 21  |
| E                       | 22     | 22  |
| D                       | 23     | 23  |
| V                       | 24     | 24  |
| G                       | 25     | 25  |
| S                       | 26     | 26  |
| N                       | 27     | 27  |
| K                       | 28     | 28  |
| G                       | 29     | 29  |
| A                       | 30     | 30  |
| I                       | 31     | 31  |
| I                       | 32     | 32  |
| G                       | 33     | 33  |
| L                       | 34     | 34  |
| M                       | 35     | 35  |
| V                       | 36     | 36  |
| G                       | 37     | 37  |
| G                       | 38     | 38  |
| V                       | 39     | 39  |
| V                       | 40     | 40  |
| I                       | 41     | 41  |
| A                       | 42     | 42  |

Table 5: Alignment vs PDB residue mapping for the Amyloid set of 80 sequences.  
See legend Table 4-Text S15.

| Protein A-B domain<br>490 sequences |        |     |
|-------------------------------------|--------|-----|
| Res                                 | Al pos | PDB |
| A                                   | 5      | 2   |
| D                                   | 7      | 3   |
| N                                   | 8      | 4   |
| K                                   | 9      | 5   |
| F                                   | 10     | 6   |
| N                                   | 11     | 7   |
| K                                   | 12     | 8   |
| E                                   | 13     | 9   |
| Q                                   | 14     | 10  |
| Q                                   | 15     | 11  |
| N                                   | 16     | 12  |
| A                                   | 17     | 13  |
| F                                   | 18     | 14  |
| Y                                   | 19     | 15  |
| E                                   | 20     | 16  |
| I                                   | 21     | 17  |
| L                                   | 22     | 18  |
| H                                   | 23     | 19  |
| L                                   | 24     | 20  |
| P                                   | 25     | 21  |
| N                                   | 26     | 22  |
| L                                   | 27     | 23  |
| N                                   | 28     | 24  |
| E                                   | 29     | 25  |
| E                                   | 30     | 26  |
| Q                                   | 31     | 27  |
| R                                   | 32     | 28  |
| N                                   | 33     | 29  |
| G                                   | 34     | 30  |
| F                                   | 35     | 31  |
| I                                   | 36     | 32  |
| Q                                   | 37     | 33  |
| S                                   | 38     | 34  |
| L                                   | 39     | 35  |
| K                                   | 40     | 36  |
| D                                   | 41     | 37  |
| D                                   | 42     | 38  |
| P                                   | 43     | 39  |
| S                                   | 44     | 40  |
| Q                                   | 45     | 41  |
| S                                   | 46     | 42  |
| A                                   | 47     | 43  |
| N                                   | 48     | 44  |
| L                                   | 49     | 45  |
| L                                   | 50     | 46  |
| A                                   | 51     | 47  |
| E                                   | 52     | 48  |
| A                                   | 53     | 49  |
| K                                   | 54     | 50  |
| K                                   | 55     | 51  |
| L                                   | 56     | 52  |
| N                                   | 57     | 53  |
| D                                   | 58     | 54  |
| A                                   | 59     | 55  |

Table 6: **Alignment vs PDB residue mapping for the Protein A-B domain set of 490 sequences.**  
See legend Table 4-Text S15.

| Protein A-B domain<br>452 sequences |        |     |
|-------------------------------------|--------|-----|
| Res                                 | Al pos | PDB |
| A                                   | 1      | 2   |
| D                                   | 3      | 3   |
| N                                   | 4      | 4   |
| K                                   | 5      | 5   |
| F                                   | 6      | 6   |
| N                                   | 7      | 7   |
| K                                   | 8      | 8   |
| E                                   | 9      | 9   |
| Q                                   | 10     | 10  |
| Q                                   | 11     | 11  |
| N                                   | 12     | 12  |
| A                                   | 13     | 13  |
| F                                   | 14     | 14  |
| Y                                   | 15     | 15  |
| E                                   | 16     | 16  |
| I                                   | 17     | 17  |
| L                                   | 18     | 18  |
| H                                   | 19     | 19  |
| L                                   | 20     | 20  |
| P                                   | 21     | 21  |
| N                                   | 22     | 22  |
| L                                   | 23     | 23  |
| N                                   | 24     | 24  |
| E                                   | 25     | 25  |
| E                                   | 26     | 26  |
| Q                                   | 27     | 27  |
| R                                   | 28     | 28  |
| N                                   | 29     | 29  |
| G                                   | 30     | 30  |
| F                                   | 31     | 31  |
| I                                   | 32     | 32  |
| Q                                   | 33     | 33  |
| S                                   | 34     | 34  |
| L                                   | 35     | 35  |
| K                                   | 36     | 36  |
| D                                   | 37     | 37  |
| D                                   | 38     | 38  |
| P                                   | 39     | 39  |
| S                                   | 40     | 40  |
| Q                                   | 41     | 41  |
| S                                   | 42     | 42  |
| A                                   | 43     | 43  |
| N                                   | 44     | 44  |
| L                                   | 45     | 45  |
| L                                   | 46     | 46  |
| A                                   | 47     | 47  |
| E                                   | 48     | 48  |
| A                                   | 49     | 49  |
| K                                   | 50     | 50  |
| K                                   | 51     | 51  |
| L                                   | 52     | 52  |
| N                                   | 53     | 53  |
| D                                   | 54     | 54  |
| A                                   | 55     | 55  |

Table 7: **Alignment vs PDB residue mapping for the Protein A-B domain set of 452 sequences.**  
See legend Table 4-Text S15.



| Protein A-B domain<br>28 sequences |        |     |
|------------------------------------|--------|-----|
| Res                                | Al pos | PDB |
| A                                  | 5      | 2   |
| D                                  | 7      | 3   |
| N                                  | 8      | 4   |
| K                                  | 9      | 5   |
| F                                  | 10     | 6   |
| N                                  | 11     | 7   |
| K                                  | 12     | 8   |
| E                                  | 13     | 9   |
| Q                                  | 14     | 10  |
| Q                                  | 15     | 11  |
| N                                  | 16     | 12  |
| A                                  | 17     | 13  |
| F                                  | 18     | 14  |
| Y                                  | 19     | 15  |
| E                                  | 20     | 16  |
| I                                  | 21     | 17  |
| L                                  | 22     | 18  |
| H                                  | 23     | 19  |
| L                                  | 24     | 20  |
| P                                  | 25     | 21  |
| N                                  | 26     | 22  |
| L                                  | 27     | 23  |
| T                                  | 28     | 24  |
| E                                  | 29     | 25  |
| E                                  | 30     | 26  |
| Q                                  | 31     | 27  |
| R                                  | 32     | 28  |
| N                                  | 33     | 29  |
| G                                  | 34     | 30  |
| F                                  | 35     | 31  |
| I                                  | 36     | 32  |
| Q                                  | 37     | 33  |
| S                                  | 38     | 34  |
| L                                  | 39     | 35  |
| K                                  | 40     | 36  |
| D                                  | 41     | 37  |
| D                                  | 42     | 38  |
| P                                  | 43     | 39  |
| S                                  | 44     | 40  |
| V                                  | 45     | 41  |
| S                                  | 46     | 42  |
| K                                  | 47     | 43  |
| E                                  | 48     | 44  |
| I                                  | 49     | 45  |
| L                                  | 50     | 46  |
| A                                  | 51     | 47  |
| E                                  | 52     | 48  |
| A                                  | 53     | 49  |
| K                                  | 54     | 50  |
| K                                  | 55     | 51  |
| L                                  | 56     | 52  |
| N                                  | 57     | 53  |
| D                                  | 58     | 54  |
| A                                  | 59     | 55  |

Table 8: **Alignment vs PDB residue mapping for the Protein A-B domain set of 28 sequences.**  
See legend Table 4-Text S15.

| Protein A-B domain<br>20 sequences |        |     |
|------------------------------------|--------|-----|
| Res                                | Al pos | PDB |
| A                                  | 1      | 2   |
| D                                  | 3      | 3   |
| N                                  | 4      | 4   |
| K                                  | 5      | 5   |
| F                                  | 6      | 6   |
| N                                  | 7      | 7   |
| K                                  | 8      | 8   |
| E                                  | 9      | 9   |
| Q                                  | 10     | 10  |
| Q                                  | 11     | 11  |
| N                                  | 12     | 12  |
| A                                  | 13     | 13  |
| F                                  | 14     | 14  |
| Y                                  | 15     | 15  |
| E                                  | 16     | 16  |
| I                                  | 17     | 17  |
| L                                  | 18     | 18  |
| H                                  | 19     | 19  |
| L                                  | 20     | 20  |
| P                                  | 21     | 21  |
| N                                  | 22     | 22  |
| L                                  | 23     | 23  |
| T                                  | 24     | 24  |
| E                                  | 25     | 25  |
| E                                  | 26     | 26  |
| Q                                  | 27     | 27  |
| R                                  | 28     | 28  |
| N                                  | 29     | 29  |
| G                                  | 30     | 30  |
| F                                  | 31     | 31  |
| I                                  | 32     | 32  |
| Q                                  | 33     | 33  |
| S                                  | 34     | 34  |
| L                                  | 35     | 35  |
| K                                  | 36     | 36  |
| D                                  | 37     | 37  |
| D                                  | 38     | 38  |
| P                                  | 39     | 39  |
| S                                  | 40     | 40  |
| V                                  | 41     | 41  |
| S                                  | 42     | 42  |
| K                                  | 43     | 43  |
| E                                  | 44     | 44  |
| I                                  | 45     | 45  |
| L                                  | 46     | 46  |
| A                                  | 47     | 47  |
| E                                  | 48     | 48  |
| A                                  | 49     | 49  |
| K                                  | 50     | 50  |
| K                                  | 51     | 51  |
| L                                  | 52     | 52  |
| N                                  | 53     | 53  |
| D                                  | 54     | 54  |
| A                                  | 55     | 55  |

Table 9: **Alignment vs PDB residue mapping for the Protein A-B domain set of 20 sequences.**  
See legend Table 4-Text 15.

**MukB - 205 sequences**

| Res | Al pos | PDB | Res | Al pos | PDB | Res | Al pos | PDB | Res | Al pos | PDB | Res | Al pos | PDB | Res | Al pos | PDB | Res | Al pos | PDB |
|-----|--------|-----|-----|--------|-----|-----|--------|-----|-----|--------|-----|-----|--------|-----|-----|--------|-----|-----|--------|-----|
| M   | 7      | 1   | S   | 80     | 41  | L   | 120    | 81  | F   | 162    | 121 | E   | 203    | 161 | I   | 243    | 201 |     |        |     |
| I   | 8      | 2   | T   | 81     | 42  | K   | 121    | 82  | A   | 163    | 122 | G   | 204    | 162 | E   | 244    | 202 |     |        |     |
| E   | 9      | 3   | T   | 82     | 43  | A   | 122    | 83  | I   | 164    | 123 | V   | 205    | 163 | A   | 245    | 203 |     |        |     |
| R   | 10     | 4   | M   | 83     | 44  | G   | 124    | 84  | Q   | 165    | 124 | Q   | 206    | 164 | S   | 246    | 204 |     |        |     |
| G   | 11     | 5   | A   | 84     | 45  | V   | 126    | 85  | G   | 166    | 125 | F   | 207    | 165 | L   | 247    | 205 |     |        |     |
| K   | 12     | 6   | A   | 85     | 46  | C   | 127    | 86  | L   | 167    | 126 | K   | 208    | 166 | Y   | 248    | 206 |     |        |     |
| F   | 13     | 7   | F   | 86     | 47  | Y   | 128    | 87  | P   | 168    | 127 | Q   | 209    | 167 | G   | 249    | 207 |     |        |     |
| R   | 14     | 8   | V   | 87     | 48  | S   | 129    | 88  | M   | 169    | 128 | F   | 210    | 168 | G   | 250    | 208 |     |        |     |
| S   | 15     | 9   | T   | 88     | 49  | M   | 130    | 89  | S   | 170    | 129 | N   | 211    | 169 | I   | 251    | 209 |     |        |     |
| L   | 16     | 10  | A   | 89     | 50  | L   | 131    | 90  | V   | 171    | 130 | S   | 212    | 170 | S   | 252    | 210 |     |        |     |
| T   | 17     | 11  | L   | 90     | 51  | D   | 132    | 91  | Q   | 172    | 131 | I   | 213    | 171 | S   | 253    | 211 |     |        |     |
| L   | 18     | 12  | I   | 91     | 52  | T   | 133    | 92  | P   | 173    | 132 | T   | 214    | 172 | A   | 254    | 212 |     |        |     |
| I   | 19     | 13  | P   | 92     | 53  | I   | 134    | 93  | T   | 174    | 133 | D   | 215    | 173 | I   | 255    | 213 |     |        |     |
| N   | 20     | 14  | D   | 93     | 54  | N   | 135    | 94  | Q   | 175    | 134 | Y   | 216    | 174 | T   | 256    | 214 |     |        |     |
| W   | 21     | 15  | L   | 94     | 55  | S   | 136    | 95  | L   | 176    | 135 | H   | 217    | 175 | R   | 257    | 215 |     |        |     |
| N   | 22     | 16  | T   | 95     | 56  | H   | 137    | 96  | V   | 177    | 136 | S   | 218    | 176 | S   | 258    | 216 |     |        |     |
| G   | 23     | 17  | L   | 96     | 57  | H   | 138    | 97  | T   | 178    | 137 | L   | 219    | 177 | L   | 259    | 217 |     |        |     |
| F   | 24     | 18  | L   | 97     | 58  | Q   | 139    | 98  | E   | 179    | 138 | M   | 220    | 178 | R   | 260    | 218 |     |        |     |
| F   | 25     | 19  | H   | 98     | 59  | R   | 140    | 99  | T   | 180    | 139 | F   | 221    | 179 | D   | 261    | 219 |     |        |     |
| A   | 26     | 20  | F   | 99     | 60  | V   | 141    | 100 | L   | 181    | 140 | D   | 222    | 180 | Y   | 262    | 220 |     |        |     |
| R   | 27     | 21  | R   | 100    | 61  | V   | 142    | 101 | N   | 182    | 141 | L   | 223    | 181 | L   | 263    | 221 |     |        |     |
| T   | 28     | 22  | N   | 101    | 62  | V   | 143    | 102 | E   | 183    | 142 | G   | 224    | 182 | L   | 264    | 222 |     |        |     |
| F   | 29     | 23  | T   | 102    | 63  | G   | 144    | 103 | R   | 184    | 143 | I   | 225    | 183 | P   | 265    | 223 |     |        |     |
| D   | 30     | 24  | T   | 103    | 64  | V   | 145    | 104 | Q   | 185    | 144 | I   | 226    | 184 | E   | 266    | 224 |     |        |     |
| L   | 31     | 25  | E   | 104    | 65  | R   | 146    | 105 | A   | 186    | 145 | A   | 227    | 185 | N   | 267    | 225 |     |        |     |
| D   | 32     | 26  | A   | 105    | 66  | L   | 147    | 106 | R   | 187    | 146 | R   | 228    | 186 | S   | 268    | 226 |     |        |     |
| E   | 33     | 27  | G   | 106    | 67  | Q   | 148    | 107 | V   | 188    | 147 | R   | 229    | 187 | G   | 269    | 227 |     |        |     |
| L   | 45     | 28  | A   | 107    | 68  | Q   | 149    | 108 | L   | 189    | 148 | L   | 230    | 188 |     |        |     |     |        |     |
| V   | 60     | 29  | T   | 108    | 69  | V   | 150    | 109 | P   | 190    | 149 | R   | 231    | 189 |     |        |     |     |        |     |
| T   | 61     | 30  | S   | 109    | 70  | A   | 151    | 110 | L   | 191    | 150 | S   | 232    | 190 |     |        |     |     |        |     |
| T   | 70     | 31  | G   | 110    | 71  | G   | 152    | 111 | N   | 193    | 151 | A   | 233    | 191 |     |        |     |     |        |     |
| L   | 71     | 32  | S   | 111    | 72  | R   | 153    | 112 | E   | 194    | 152 | S   | 234    | 192 |     |        |     |     |        |     |
| S   | 72     | 33  | R   | 112    | 73  | D   | 154    | 113 | L   | 195    | 153 | D   | 235    | 193 |     |        |     |     |        |     |
| G   | 73     | 34  | D   | 113    | 74  | R   | 155    | 114 | K   | 196    | 154 | R   | 236    | 194 |     |        |     |     |        |     |
| G   | 74     | 35  | K   | 114    | 75  | K   | 156    | 115 | D   | 197    | 155 | S   | 237    | 195 |     |        |     |     |        |     |
| N   | 75     | 36  | G   | 115    | 76  | V   | 157    | 116 | K   | 198    | 156 | K   | 238    | 196 |     |        |     |     |        |     |
| G   | 76     | 37  | L   | 116    | 77  | D   | 158    | 117 | L   | 199    | 157 | F   | 239    | 197 |     |        |     |     |        |     |
| A   | 77     | 38  | H   | 117    | 78  | I   | 159    | 118 | E   | 200    | 158 | Y   | 240    | 198 |     |        |     |     |        |     |
| G   | 78     | 39  | G   | 118    | 79  | K   | 160    | 119 | A   | 201    | 159 | R   | 241    | 199 |     |        |     |     |        |     |
| K   | 79     | 40  | K   | 119    | 80  | P   | 161    | 120 | M   | 202    | 160 | L   | 242    | 200 |     |        |     |     |        |     |

Table 10: **Alignment vs PDB residue mapping for the MukB domain set of 205 sequences.**  
See legend Table 4-Text S15.

| MukB - 200 sequences |        |     |     |        |     |     |        |     |     |        |     |     |        |     |
|----------------------|--------|-----|-----|--------|-----|-----|--------|-----|-----|--------|-----|-----|--------|-----|
| Res                  | Al pos | PDB | Res | Al pos | PDB | Res | Al pos | PDB | Res | Al pos | PDB | Res | Al pos | PDB |
| M                    | 3      | 1   | S   | 43     | 41  | L   | 83     | 81  | F   | 123    | 121 | E   | 163    | 161 |
| I                    | 4      | 2   | T   | 44     | 42  | K   | 84     | 82  | A   | 124    | 122 | G   | 164    | 162 |
| E                    | 5      | 3   | T   | 45     | 43  | A   | 85     | 83  | I   | 125    | 123 | V   | 165    | 163 |
| R                    | 6      | 4   | M   | 46     | 44  | G   | 86     | 84  | Q   | 126    | 124 | Q   | 166    | 164 |
| G                    | 7      | 5   | A   | 47     | 45  | V   | 87     | 85  | G   | 127    | 125 | F   | 167    | 165 |
| K                    | 8      | 6   | A   | 48     | 46  | C   | 88     | 86  | L   | 128    | 126 | K   | 168    | 166 |
| F                    | 9      | 7   | F   | 49     | 47  | Y   | 89     | 87  | P   | 129    | 127 | Q   | 169    | 167 |
| R                    | 10     | 8   | V   | 50     | 48  | S   | 90     | 88  | M   | 130    | 128 | F   | 170    | 168 |
| S                    | 11     | 9   | T   | 51     | 49  | M   | 91     | 89  | S   | 131    | 129 | N   | 171    | 169 |
| L                    | 12     | 10  | A   | 52     | 50  | L   | 92     | 90  | V   | 132    | 130 | S   | 172    | 170 |
| T                    | 13     | 11  | L   | 53     | 51  | D   | 93     | 91  | Q   | 133    | 131 | I   | 173    | 171 |
| L                    | 14     | 12  | I   | 54     | 52  | T   | 94     | 92  | P   | 134    | 132 | T   | 174    | 172 |
| I                    | 15     | 13  | P   | 55     | 53  | I   | 95     | 93  | T   | 135    | 133 | D   | 175    | 173 |
| N                    | 16     | 14  | D   | 56     | 54  | N   | 96     | 94  | Q   | 136    | 134 | Y   | 176    | 174 |
| W                    | 17     | 15  | L   | 57     | 55  | S   | 97     | 95  | L   | 137    | 135 | H   | 177    | 175 |
| N                    | 18     | 16  | T   | 58     | 56  | H   | 98     | 96  | V   | 138    | 136 | S   | 178    | 176 |
| G                    | 19     | 17  | L   | 59     | 57  | H   | 99     | 97  | T   | 139    | 137 | L   | 179    | 177 |
| F                    | 20     | 18  | L   | 60     | 58  | Q   | 100    | 98  | E   | 140    | 138 | M   | 180    | 178 |
| F                    | 21     | 19  | H   | 61     | 59  | R   | 101    | 99  | T   | 141    | 139 | F   | 181    | 179 |
| A                    | 22     | 20  | F   | 62     | 60  | V   | 102    | 100 | L   | 142    | 140 | D   | 182    | 180 |
| R                    | 23     | 21  | R   | 63     | 61  | V   | 103    | 101 | N   | 143    | 141 | L   | 183    | 181 |
| T                    | 24     | 22  | N   | 64     | 62  | V   | 104    | 102 | E   | 144    | 142 | G   | 184    | 182 |
| F                    | 25     | 23  | T   | 65     | 63  | G   | 105    | 103 | R   | 145    | 143 | I   | 185    | 183 |
| D                    | 26     | 24  | T   | 66     | 64  | V   | 106    | 104 | Q   | 146    | 144 | I   | 186    | 184 |
| L                    | 27     | 25  | E   | 67     | 65  | R   | 107    | 105 | A   | 147    | 145 | A   | 187    | 185 |
| D                    | 28     | 26  | A   | 68     | 66  | L   | 108    | 106 | R   | 148    | 146 | R   | 188    | 186 |
| E                    | 29     | 27  | G   | 69     | 67  | Q   | 109    | 107 | V   | 149    | 147 | R   | 189    | 187 |
| L                    | 30     | 28  | A   | 70     | 68  | Q   | 110    | 108 | L   | 150    | 148 | L   | 190    | 188 |
| V                    | 31     | 29  | T   | 71     | 69  | V   | 111    | 109 | P   | 151    | 149 | R   | 191    | 189 |
| T                    | 32     | 30  | S   | 72     | 70  | A   | 112    | 110 | L   | 152    | 150 | S   | 192    | 190 |
| T                    | 33     | 31  | G   | 73     | 71  | G   | 113    | 111 | N   | 153    | 151 | A   | 193    | 191 |
| L                    | 34     | 32  | S   | 74     | 72  | R   | 114    | 112 | E   | 154    | 152 | S   | 194    | 192 |
| S                    | 35     | 33  | R   | 75     | 73  | D   | 115    | 113 | L   | 155    | 153 | D   | 195    | 193 |
| G                    | 36     | 34  | D   | 76     | 74  | R   | 116    | 114 | K   | 156    | 154 | R   | 196    | 194 |
| G                    | 37     | 35  | K   | 77     | 75  | K   | 117    | 115 | D   | 157    | 155 | S   | 197    | 195 |
| N                    | 38     | 36  | G   | 78     | 76  | V   | 118    | 116 | K   | 158    | 156 | K   | 198    | 196 |
| G                    | 39     | 37  | L   | 79     | 77  | D   | 119    | 117 | L   | 159    | 157 | F   | 199    | 197 |
| A                    | 40     | 38  | H   | 80     | 78  | I   | 120    | 118 | E   | 160    | 158 | Y   | 200    | 198 |
| G                    | 41     | 39  | G   | 81     | 79  | K   | 121    | 119 | A   | 161    | 159 | R   | 201    | 199 |
| K                    | 42     | 40  | K   | 82     | 80  | P   | 122    | 120 | M   | 162    | 160 | L   | 202    | 200 |

Table 11: Alignment vs PDB residue mapping for the MukB domain set of 200 sequences. See legend Table 4-Text S15.

| MukB 54 sequences |        |     |     |        |     |     |        |     |     |        |     |     |        |     |
|-------------------|--------|-----|-----|--------|-----|-----|--------|-----|-----|--------|-----|-----|--------|-----|
| Res               | Al pos | PDB | Res | Al pos | PDB | Res | Al pos | PDB | Res | Al pos | PDB | Res | Al pos | PDB |
| M                 | 7      | 1   | S   | 80     | 41  | L   | 120    | 81  | F   | 162    | 121 | E   | 203    | 161 |
| I                 | 8      | 2   | T   | 81     | 42  | R   | 121    | 82  | M   | 163    | 122 | G   | 204    | 162 |
| E                 | 9      | 3   | T   | 82     | 43  | P   | 122    | 83  | I   | 164    | 123 | L   | 205    | 163 |
| R                 | 10     | 4   | M   | 83     | 44  | G   | 124    | 84  | Q   | 165    | 124 | H   | 206    | 164 |
| G                 | 11     | 5   | A   | 84     | 45  | V   | 126    | 85  | G   | 166    | 125 | F   | 207    | 165 |
| K                 | 12     | 6   | A   | 85     | 46  | C   | 127    | 86  | V   | 167    | 126 | K   | 208    | 166 |
| F                 | 13     | 7   | F   | 86     | 47  | Y   | 128    | 87  | P   | 168    | 127 | Q   | 209    | 167 |
| R                 | 14     | 8   | I   | 87     | 48  | A   | 129    | 88  | I   | 169    | 128 | F   | 210    | 168 |
| S                 | 15     | 9   | T   | 88     | 49  | V   | 130    | 89  | A   | 170    | 129 | N   | 211    | 169 |
| L                 | 16     | 10  | A   | 89     | 50  | L   | 131    | 90  | T   | 171    | 130 | S   | 212    | 170 |
| T                 | 17     | 11  | M   | 90     | 51  | D   | 132    | 91  | V   | 172    | 131 | I   | 213    | 171 |
| L                 | 18     | 12  | I   | 91     | 52  | V   | 133    | 92  | P   | 173    | 132 | T   | 214    | 172 |
| I                 | 19     | 13  | P   | 92     | 53  | L   | 134    | 93  | T   | 174    | 133 | D   | 215    | 173 |
| N                 | 20     | 14  | D   | 93     | 54  | N   | 135    | 94  | E   | 175    | 134 | Y   | 216    | 174 |
| W                 | 21     | 15  | L   | 94     | 55  | S   | 136    | 95  | V   | 176    | 135 | H   | 217    | 175 |
| N                 | 22     | 16  | T   | 95     | 56  | K   | 137    | 96  | L   | 177    | 136 | S   | 218    | 176 |
| G                 | 23     | 17  | L   | 96     | 57  | H   | 138    | 97  | T   | 178    | 137 | V   | 219    | 177 |
| F                 | 24     | 18  | L   | 97     | 58  | Q   | 139    | 98  | E   | 179    | 138 | L   | 220    | 178 |
| F                 | 25     | 19  | H   | 98     | 59  | R   | 140    | 99  | I   | 180    | 139 | F   | 221    | 179 |
| A                 | 26     | 20  | F   | 99     | 60  | V   | 141    | 100 | V   | 181    | 140 | E   | 222    | 180 |
| R                 | 27     | 21  | R   | 100    | 61  | I   | 142    | 101 | D   | 182    | 141 | L   | 223    | 181 |
| T                 | 28     | 22  | N   | 101    | 62  | V   | 143    | 102 | G   | 183    | 142 | G   | 224    | 182 |
| F                 | 29     | 23  | T   | 102    | 63  | G   | 144    | 103 | R   | 184    | 143 | V   | 225    | 183 |
| D                 | 30     | 24  | T   | 103    | 64  | V   | 145    | 104 | Q   | 185    | 144 | L   | 226    | 184 |
| L                 | 31     | 25  | E   | 104    | 65  | R   | 146    | 105 | A   | 186    | 145 | P   | 227    | 185 |
| D                 | 32     | 26  | A   | 105    | 66  | L   | 147    | 106 | K   | 187    | 146 | K   | 228    | 186 |
| E                 | 33     | 27  | G   | 106    | 67  | Q   | 148    | 107 | V   | 188    | 147 | R   | 229    | 187 |
| L                 | 45     | 28  | A   | 107    | 68  | Q   | 149    | 108 | I   | 189    | 148 | L   | 230    | 188 |
| V                 | 60     | 29  | T   | 108    | 69  | V   | 150    | 109 | A   | 190    | 149 | R   | 231    | 189 |
| T                 | 61     | 30  | T   | 109    | 70  | A   | 151    | 110 | L   | 191    | 150 | S   | 232    | 190 |
| T                 | 70     | 31  | G   | 110    | 71  | G   | 152    | 111 | N   | 193    | 151 | A   | 233    | 191 |
| L                 | 71     | 32  | S   | 111    | 72  | R   | 153    | 112 | E   | 194    | 152 | S   | 234    | 192 |
| S                 | 72     | 33  | R   | 112    | 73  | D   | 154    | 113 | L   | 195    | 153 | D   | 235    | 193 |
| G                 | 73     | 34  | D   | 113    | 74  | K   | 155    | 114 | K   | 196    | 154 | R   | 236    | 194 |
| G                 | 74     | 35  | K   | 114    | 75  | K   | 156    | 115 | E   | 197    | 155 | S   | 237    | 195 |
| N                 | 75     | 36  | G   | 115    | 76  | V   | 157    | 116 | R   | 198    | 156 | K   | 238    | 196 |
| G                 | 76     | 37  | L   | 116    | 77  | D   | 158    | 117 | L   | 199    | 157 | Y   | 239    | 197 |
| A                 | 77     | 38  | H   | 117    | 78  | I   | 159    | 118 | E   | 200    | 158 | Y   | 240    | 198 |
| G                 | 78     | 39  | G   | 118    | 79  | K   | 160    | 119 | Q   | 201    | 159 | R   | 241    | 199 |
| K                 | 79     | 40  | K   | 119    | 80  | P   | 161    | 120 | Q   | 202    | 160 | L   | 242    | 200 |

Table 12: Alignment vs PDB residue mapping for the MukB domain set of 54 sequences. See legend Table 4-Text S15.

| MukB 49 sequences |        |     |     |        |     |     |        |     |     |        |     |     |        |     |     |     |
|-------------------|--------|-----|-----|--------|-----|-----|--------|-----|-----|--------|-----|-----|--------|-----|-----|-----|
| Res               | Al pos | PDB | Res | Al pos | PDB | Res | Al pos | PDB | Res | Al pos | PDB | Res | Al pos | PDB | PDB |     |
| M                 | 3      | 1   | S   | 43     | 41  | L   | 83     | 81  | F   | 123    | 121 | E   | 163    | 161 | I   | 203 |
| I                 | 4      | 2   | T   | 44     | 42  | K   | 84     | 82  | A   | 124    | 122 | G   | 164    | 162 | E   | 204 |
| E                 | 5      | 3   | T   | 45     | 43  | A   | 85     | 83  | I   | 125    | 123 | V   | 165    | 163 | A   | 205 |
| R                 | 6      | 4   | M   | 46     | 44  | G   | 86     | 84  | Q   | 126    | 124 | Q   | 166    | 164 | S   | 206 |
| G                 | 7      | 5   | A   | 47     | 45  | V   | 87     | 85  | G   | 127    | 125 | F   | 167    | 165 | L   | 207 |
| K                 | 8      | 6   | A   | 48     | 46  | C   | 88     | 86  | L   | 128    | 126 | K   | 168    | 166 | Y   | 208 |
| F                 | 9      | 7   | F   | 49     | 47  | Y   | 89     | 87  | P   | 129    | 127 | Q   | 169    | 167 | G   | 209 |
| R                 | 10     | 8   | V   | 50     | 48  | S   | 90     | 88  | M   | 130    | 128 | F   | 170    | 168 | G   | 210 |
| S                 | 11     | 9   | T   | 51     | 49  | M   | 91     | 89  | S   | 131    | 129 | N   | 171    | 169 | I   | 211 |
| L                 | 12     | 10  | A   | 52     | 50  | L   | 92     | 90  | V   | 132    | 130 | S   | 172    | 170 | S   | 212 |
| T                 | 13     | 11  | L   | 53     | 51  | D   | 93     | 91  | Q   | 133    | 131 | I   | 173    | 171 | S   | 213 |
| L                 | 14     | 12  | I   | 54     | 52  | T   | 94     | 92  | P   | 134    | 132 | T   | 174    | 172 | A   | 214 |
| I                 | 15     | 13  | P   | 55     | 53  | I   | 95     | 93  | T   | 135    | 133 | D   | 175    | 173 | I   | 215 |
| N                 | 16     | 14  | D   | 56     | 54  | N   | 96     | 94  | Q   | 136    | 134 | Y   | 176    | 174 | T   | 216 |
| W                 | 17     | 15  | L   | 57     | 55  | S   | 97     | 95  | L   | 137    | 135 | H   | 177    | 175 | R   | 217 |
| N                 | 18     | 16  | T   | 58     | 56  | H   | 98     | 96  | V   | 138    | 136 | S   | 178    | 176 | S   | 218 |
| G                 | 19     | 17  | L   | 59     | 57  | H   | 99     | 97  | T   | 139    | 137 | L   | 179    | 177 | L   | 219 |
| F                 | 20     | 18  | L   | 60     | 58  | Q   | 100    | 98  | E   | 140    | 138 | M   | 180    | 178 | R   | 220 |
| F                 | 21     | 19  | H   | 61     | 59  | R   | 101    | 99  | T   | 141    | 139 | F   | 181    | 179 | D   | 221 |
| A                 | 22     | 20  | F   | 62     | 60  | V   | 102    | 100 | L   | 142    | 140 | D   | 182    | 180 | Y   | 222 |
| R                 | 23     | 21  | R   | 63     | 61  | V   | 103    | 101 | N   | 143    | 141 | L   | 183    | 181 | L   | 223 |
| T                 | 24     | 22  | N   | 64     | 62  | V   | 104    | 102 | E   | 144    | 142 | G   | 184    | 182 | L   | 224 |
| F                 | 25     | 23  | T   | 65     | 63  | G   | 105    | 103 | R   | 145    | 143 | I   | 185    | 183 | P   | 225 |
| D                 | 26     | 24  | T   | 66     | 64  | V   | 106    | 104 | Q   | 146    | 144 | I   | 186    | 184 | E   | 226 |
| L                 | 27     | 25  | E   | 67     | 65  | R   | 107    | 105 | A   | 147    | 145 | A   | 187    | 185 | N   | 227 |
| D                 | 28     | 26  | A   | 68     | 66  | L   | 108    | 106 | R   | 148    | 146 | R   | 188    | 186 | S   | 228 |
| E                 | 29     | 27  | G   | 69     | 67  | Q   | 109    | 107 | V   | 149    | 147 | R   | 189    | 187 | G   | 229 |
| L                 | 30     | 28  | A   | 70     | 68  | Q   | 110    | 108 | L   | 150    | 148 | L   | 190    | 188 |     |     |
| V                 | 31     | 29  | T   | 71     | 69  | V   | 111    | 109 | P   | 151    | 149 | R   | 191    | 189 |     |     |
| T                 | 32     | 30  | S   | 72     | 70  | A   | 112    | 110 | L   | 152    | 150 | S   | 192    | 190 |     |     |
| T                 | 33     | 31  | G   | 73     | 71  | G   | 113    | 111 | N   | 153    | 151 | A   | 193    | 191 |     |     |
| L                 | 34     | 32  | S   | 74     | 72  | R   | 114    | 112 | E   | 154    | 152 | S   | 194    | 192 |     |     |
| S                 | 35     | 33  | R   | 75     | 73  | D   | 115    | 113 | L   | 155    | 153 | D   | 195    | 193 |     |     |
| G                 | 36     | 34  | D   | 76     | 74  | R   | 116    | 114 | K   | 156    | 154 | R   | 196    | 194 |     |     |
| G                 | 37     | 35  | K   | 77     | 75  | K   | 117    | 115 | D   | 157    | 155 | S   | 197    | 195 |     |     |
| N                 | 38     | 36  | G   | 78     | 76  | V   | 118    | 116 | K   | 158    | 156 | K   | 198    | 196 |     |     |
| G                 | 39     | 37  | L   | 79     | 77  | D   | 119    | 117 | L   | 159    | 157 | F   | 199    | 197 |     |     |
| A                 | 40     | 38  | H   | 80     | 78  | I   | 120    | 118 | E   | 160    | 158 | Y   | 200    | 198 |     |     |
| G                 | 41     | 39  | G   | 81     | 79  | K   | 121    | 119 | A   | 161    | 159 | R   | 201    | 199 |     |     |
| K                 | 42     | 40  | K   | 82     | 80  | P   | 122    | 120 | M   | 162    | 160 | L   | 202    | 200 |     |     |

Table 13: Alignment vs PDB residue mapping for the MukB domain set of 49 sequences. See legend Table 4-Text S15.
