# Supplementary material for: Protein Fragments: Functional and Structural Roles of Their Coevolution Networks
Source: PubMed Central journal article supplement (PMC3489791; doi:10.1371/journal.pone.0048124), 2012-11-05
Supplement: pone.0048124.s018.pdf [file pone.0048124.s018.pdf]

Supporting Information Text S16:  
BIS and CTMP comparison

| Protein family | Method                    | Co-evolving pairs                                                                                                                                                                                                                                                                                                                                                                                                                                                                                                                                                                                         |
|----------------|---------------------------|-----------------------------------------------------------------------------------------------------------------------------------------------------------------------------------------------------------------------------------------------------------------------------------------------------------------------------------------------------------------------------------------------------------------------------------------------------------------------------------------------------------------------------------------------------------------------------------------------------------|
| MukB (49 seq)  | BIS, <i>pos</i> , $d = 0$ | C1: 4 6 9<br>C2: 14 15 16 17 18 19 20 22 23 26<br>C3: <b>36 37 39 40 41 42</b>                                                                                                                                                                                                                                                                                                                                                                                                                                                                                                                            |
|                | BIS, <i>pos</i> , $d = 1$ | C1: 44 45 52 53 54 57 58 60 61 62 63 64 65 66 67 72 73 74 76 77 79<br>80 81 84 86 87 94 95 99 106 108 112 113 115 116 121 175 179<br>182 189 193 194 198 200 202 203 204 205 206 207 208 209 210 213 216<br>217 218 220 221 222 223 225 227<br>C2: 98 174<br>C3:107 111 117 214 219<br>C4:119 125<br>C5: 59 133<br>C6: 55 187<br>C7: 29 30 31 32 33                                                                                                                                                                                                                                                       |
|                | CTMP                      | X:8 <b>36</b> :96 <b>14</b> :123 83:139 11: <b>86</b> 3:135 159:180 149:171 <b>29:32 55</b> :180 50:82<br>128:211 <b>74</b> :191 <b>57</b> :129 X: <b>54</b> 75:226 <b>17</b> :X <b>59</b> :129 21:X 68:181 128: <b>208</b> X:89<br><b>22</b> :X <b>26</b> :78 <b>41</b> : <b>64</b> X: <b>45</b> 134: <b>210</b> 110:226 <b>29</b> : <b>198</b> <b>18</b> :X 70:166<br>X: <b>198</b> X:141 <b>17</b> :X 109:191 X:173 154: <b>202</b> 7: <b>133</b> <b>72</b> :191 13:100 129:145 135:150<br><b>30</b> : <b>76</b> X:136 <b>29</b> : <b>205</b> X:92 <b>14</b> : <b>30</b> <b>39</b> :150 <b>73</b> :135 |
| MukB (54 seq)  | BIS, <i>pos</i> , $d = 0$ | C1: 16 20 22<br>C2: <b>36 37 39 40</b>                                                                                                                                                                                                                                                                                                                                                                                                                                                                                                                                                                    |
|                | BIS, <i>pos</i> , $d = 1$ | C1: 45 61 64 66 77 200 202 203<br>C2: 44 60 62 76 84 204 210 222<br>C3: 54 74 81 99 179 182 207 217 221<br>C4: 80 205<br>C5: 52 193 220<br>C6: 31 33                                                                                                                                                                                                                                                                                                                                                                                                                                                      |
|                | CTMP                      | 42:83 47:X 42:192 25:X <b>74</b> :142 117:139 X:209 X: <b>205</b> X: <b>205</b> 46:135 2:195 X:25 <b>64</b> :144<br>X:91 X: <b>77</b> 191:211 4:151 <b>64</b> :122 25:X 104:127 98:191 <b>20</b> :42 <b>39</b> :144 X:156 3:46 25:X<br>48:129 83:108 41:176 X: <b>220</b> 4:126 73:127 96:101 X:87 <b>34</b> :65 3:212 X:196 X:78 <b>80</b> :106<br>3:116 <b>31</b> :48 71:128 X:78 156:159 126:145 14: <b>37</b> X:91 X:91 38:144                                                                                                                                                                        |
| MukB (200 seq) | BIS, <i>pos</i> , $d = 0$ | C1: 4 6 9<br>C2: 14 15 16 17 18 19 20 22 23 26<br>C3: <b>34 35 36 37 39 40 41 42</b>                                                                                                                                                                                                                                                                                                                                                                                                                                                                                                                      |
|                | BIS, <i>pos</i> , $d = 1$ | C1:44 45 52 53 54 57 58 60<br>61 62 63 64 65 66 67 72 73 74 76 77 79 80 81 84 86 87 94 95 99<br>108 112 113 115 116 121 175 179 182 189 193 194 198 200 202<br>203 204 205 206 207 208 209 210 213 216 217 218 220 221 222 223 225 227<br>C2:98 174<br>C3:107 111 117 214 219<br>C4:119 125<br>C5:59 133<br>C6:49 145 170<br>C7:55 187<br>C8:29 30 31 32 33                                                                                                                                                                                                                                               |
|                | CTMP                      | NO CO-EVOLVING PAIRS                                                                                                                                                                                                                                                                                                                                                                                                                                                                                                                                                                                      |
| MukB (205 seq) | BIS, <i>pos</i> , $d = 0$ | C1: 16 20 22<br>C2: <b>36 37 39 40</b>                                                                                                                                                                                                                                                                                                                                                                                                                                                                                                                                                                    |
|                | BIS, <i>pos</i> , $d = 1$ | C1: 45 61 64 66 77 200 202 203<br>C2: 44 60 62 76 84 204 210 222<br>C3: 54 74 81 99 179 182 207 217 221<br>C4: 80 205<br>C5: 52 193 220<br>C6: 31 33                                                                                                                                                                                                                                                                                                                                                                                                                                                      |
|                | CTMP                      | NO CO-EVOLVING PAIRS                                                                                                                                                                                                                                                                                                                                                                                                                                                                                                                                                                                      |

Table 1: MukB protein: comparing BIS to CTMP.

Comparison of CTMP and BIS (run on alignment positions - *pos*) on the MukB family. The CTMP experiment was run with the following parameters: penalty = 0.1, threshold on the fraction on gapped sequences = 1, threshold on the fraction of conserved sequences = 1, threshold on the fraction of sequences covarying between overlapping states = 0.0, threshold on the likelihood = 6.0. The 50 highest pairs of co-evolving residues (pdb positions) are reported. Bolds highlight residues in common with BIS.

| Protein family | Method                         | Co-evolving pairs                                                                                                                                                                                                                                                                                    |
|----------------|--------------------------------|------------------------------------------------------------------------------------------------------------------------------------------------------------------------------------------------------------------------------------------------------------------------------------------------------|
| PABD (20 seq)  | BIS, <i>pos</i> , <i>d</i> = 0 | C1: 22 23 27 29<br>C2: 30 31 32 33 34 35 36 37 38 39 40 42 46 48 49<br>C3: 41 44<br>C4: 51 52                                                                                                                                                                                                        |
|                | BIS, <i>pos</i> , <i>d</i> = 1 | C1: 11 13 14 15 18<br>C2: 16 17                                                                                                                                                                                                                                                                      |
|                | CTMP                           | 3:11 6:23 11:15 11:38 30:35 3:6 3:35 35:38 11:18 11:52 15:35 6:30 11:16<br>28:35 18:35 11:36 6:38 35:52 6:15 11:49 11:34 16:35 11:27 11:51 11:13<br>11:31 35:49 11:29 11:22 34:35 35:36 27:35 11:12 6:18 13:35 29:35 35:51<br>22:35 12:35 6:52 6:16 11:28 31:35 6:49 6:36 6:34 11:32 6:27 6:13       |
| PABD (28 seq)  | BIS, <i>pos</i> , <i>d</i> = 0 | C1: 32 39<br>C2: 42 49                                                                                                                                                                                                                                                                               |
|                | BIS, <i>pos</i> , <i>d</i> = 1 | C1: 11 13 14                                                                                                                                                                                                                                                                                         |
|                | CTMP                           | 25:30 37:48 5:13 13:28 25:51 14:33 30:33 5:32 43:46 8:34 24:32 16:25 8:20<br>37:50 21:37 32:38 37:45 17:31 8:38 13:35 14:18 8:19 19:32 15:17 8:28 20:32<br>32:44 28:32 31:54 17:51 25:43 15:54 31:33 8:44 15:33 40:54 17:29 13:46 17:30<br>8:26 23:25 25:38 32:50 33:40 25:34 17:36 3:37 30:40 29:54 |
| PABD (452 seq) | BIS, <i>pos</i> , <i>d</i> = 0 | C1: 22 23 27 29<br>C2: 30 31 32 33 34 35 36 37 38 39 40 42 46 48 49<br>C3: 41 44<br>C4: 51 52                                                                                                                                                                                                        |
|                | BIS, <i>pos</i> , <i>d</i> = 1 | C1: 11 13 14 15 18<br>C2: 16 17                                                                                                                                                                                                                                                                      |
|                | CTMP                           | 35:42 27:39 28:37 21:47 8:30 16:39 9:35 9:21 X:34 12:52 3:39 20:21<br>10:46 8:28 21:48 12:47 39:44 39:42 47:52 7:21 X:28 14:50 6:37 5:52 17:35<br>7:10 5:40 26:39 10:37 26:50 7:52 21:45 7:47 12:40 7:12 16:50 40:47 42:50<br>40:52 35:47 X:25 33:39 10:19 18:50 36:50 21:52 5:12 38:39 29:39        |
| PABD (490 seq) | BIS, <i>pos</i> , <i>d</i> = 0 | C1: 32 39                                                                                                                                                                                                                                                                                            |
|                | BIS, <i>pos</i> , <i>d</i> = 1 | C1: 11 13 14                                                                                                                                                                                                                                                                                         |
|                | CTMP                           | 23:50 26:37 11:53 20:39 4:27 14:37 19:39 10:52 5:21 X:20 36:37 X:14 21:52<br>4:19 X:19 45:50 21:40 7:35 18:50 35:47 4:20 39:46 X:23 3:8 39:43 X:36 8:23<br>7:52 39:45 3:50 47:52 31:39 4:14 25:39 40:52 30:53 44:50 4:44 4:26 37:44 4:16<br>4:18 8:37 10:35 X:44 8:25 10:39 19:37 31:50              |

Table 2: **Protein A-B domain: comparing BIS to CTMP.**

Comparison of CTMP and BIS (run on alignment positions) analyses of the Protein A-B domain family. See legend in Table 1-Text S16.

| AATpase family | Method                         | Co-evolving pairs                                                                                                                                                                                                                                                                                                                                                                                                                                                                                                                                    |
|----------------|--------------------------------|------------------------------------------------------------------------------------------------------------------------------------------------------------------------------------------------------------------------------------------------------------------------------------------------------------------------------------------------------------------------------------------------------------------------------------------------------------------------------------------------------------------------------------------------------|
| DEAD-box       | BIS, <i>pos</i> , <i>d</i> = 0 | C1: 34 73 75 76 256 257 259 318 319 709 797 804                                                                                                                                                                                                                                                                                                                                                                                                                                                                                                      |
|                | BIS, <i>pos</i> , <i>d</i> = 1 | C1: 133 213<br>C2: 136 801                                                                                                                                                                                                                                                                                                                                                                                                                                                                                                                           |
|                | CTMP                           | 528:529 528:856 153:528 153:826 528:826 528:851 155:528 154:528 470:528 108:528 828:829<br>528:530 112:528 528:626 528:857 93:528 528:612 161:528 826:828 498:528 288:528 528:621<br>529:530 472:528 490:528 61:528 111:528 52:528 501:528 528:858 528:702 492:528 46:528 500:528<br>528:624 528:860 528:609 486:528 525:528 485:528 528:623 528:854 59:528 1:528 528:611 528:614<br>7:528 289:528 528:618                                                                                                                                           |
| DEAH-RHA       | BIS, <i>pos</i> , <i>d</i> = 0 | C1: 33 73 75 76 78 129 140 256 257 260 261 266 319 699 745 791 798 801 808                                                                                                                                                                                                                                                                                                                                                                                                                                                                           |
|                | BIS, <i>pos</i> , <i>d</i> = 1 | C1: 70 127<br>C2: 72 130 174 213 215 259 317 318 700 708711 797 800 803 804<br>C3: 134 554<br>C4: 138 170<br>C5: 750 834                                                                                                                                                                                                                                                                                                                                                                                                                             |
|                | CTMP                           | 171:672 83:171 171: <b>801</b> 171:175 83:672 325:814 814:860 83:818 161:171 171: <b>261</b><br>171:216 171:342 175:672 171:748 83:175 814:823 171:267 36:790 171: <b>804</b> 171:558 79:171 171:835<br>171:701 790:814 202:860 83:161 171:312 83:89 672: <b>801</b> 83: <b>801</b> 36:89 566:814 36:90 89:790<br>325:790 814:858 672:790 171:695 171:805 83:748 34:171 672:748 89:672 36:325 558:672 36:860<br>36:163 141:171 <b>33</b> :171                                                                                                        |
| NS3/NPH-II     | BIS, <i>pos</i> , <i>d</i> = 0 | C1: 22 37 122 128 211 264 265 312 342 346 551 813 838<br>C2: 124 711<br>C3: 73 75 76 129 170 213 256 257 259 318 319 568 745 797 800 801 803 804<br>C4: 130 327<br>C5: 131 267<br>C6: 72 132 810<br>C7: 140 214 664 667<br>C8: 8 18 536 537 674<br>C9: 78 81 210<br>C10: 215 258 562<br>C11: 254 262<br>C12: 317 554<br>C13: 320 322 699 709 743<br>C14: 321 666<br>C15: 553 802<br>C16: 677 806<br>C17: 695 701                                                                                                                                     |
|                | BIS, <i>pos</i> , <i>d</i> = 1 | C1: 125 698<br>C2: 136 217 271 657 751 862<br>C3: 16 137<br>C4: 139 831 844<br>C5: 20 23 328<br>C6: 28 763<br>C7: 333 746<br>C8: 39 794<br>C9: 544 661<br>C10: 79 759                                                                                                                                                                                                                                                                                                                                                                                |
|                | CTMP                           | 1:2 1:3                                                                                                                                                                                                                                                                                                                                                                                                                                                                                                                                              |
| Swi2/Snf2      | BIS, <i>pos</i> , <i>d</i> = 0 | C1: 73 75 76 77 136 256 257 320 804                                                                                                                                                                                                                                                                                                                                                                                                                                                                                                                  |
|                | BIS, <i>pos</i> , <i>d</i> = 1 | C1: 129 797 801 807<br>C2: 74 709                                                                                                                                                                                                                                                                                                                                                                                                                                                                                                                    |
|                | CTMP                           | 140:750 40:750 <b>73</b> :750 137:140 334:750 750:816 <b>74</b> :750 40:334 67:750 710:750<br><b>75</b> :750 <b>256</b> :750 140:215 40:140 <b>73</b> : <b>136</b> 34:40 393:750 <b>136</b> :750 641:750 <b>74</b> : <b>75</b><br>72:750 40:393 750:806 34:393 40:170 40:747 40: <b>256</b> 40: <b>73</b> 393:433 40:337 <b>73</b> : <b>74</b><br>750:817 712:750 215:750 750: <b>801</b> 671:750 140:393 <b>73</b> : <b>75</b> 34:750 67:140 396:750 137:215<br>328:750 86:393 <b>73</b> :140 <b>74</b> :710 747:750 <b>709</b> :750 <b>75</b> :710 |

Table 3: **AATPase subfamilies: comparing BIS to CTMP.**

Comparison of CTMP and BIS (run on alignment positions) analyses of the AATPase subfamilies. BIS was run on the 11 subfamilies but only 4 of them output a list of residues. See legend in Table 1-Text S16. Note that these are the only AATPase subfamilies where CTMP provided some answer.
