# Supplementary material for: Protein Fragments: Functional and Structural Roles of Their Coevolution Networks
Source: PubMed Central journal article supplement (PMC3489791; doi:10.1371/journal.pone.0048124), 2012-11-05
Supplement: pone.0048124.s019.pdf [file pone.0048124.s019.pdf]

Supporting Information Text S17:  
Protein A-B domain supplementary figures

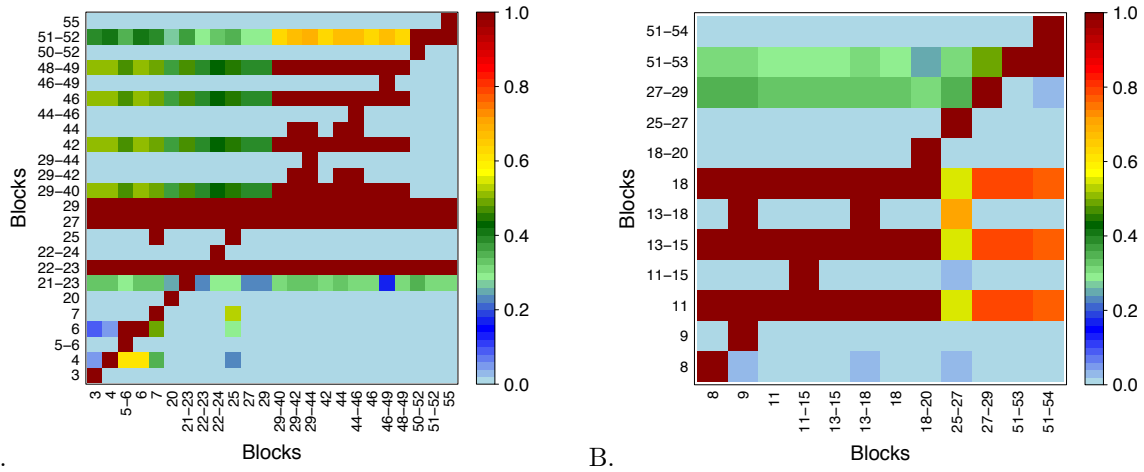

Figure 1: **Protein A-B domain: BIS unclustered correlated distribution score matrices.** BIS analysis realized on the dataset of 452 sequences. **A:** matrix computed for  $d = 0$ . The clustered matrix is reported in Fig. 2A-Text S17 (clusters have symmetric and environmental scores  $\geq 0$ ). **B:** matrix computed for  $d = 1$ .

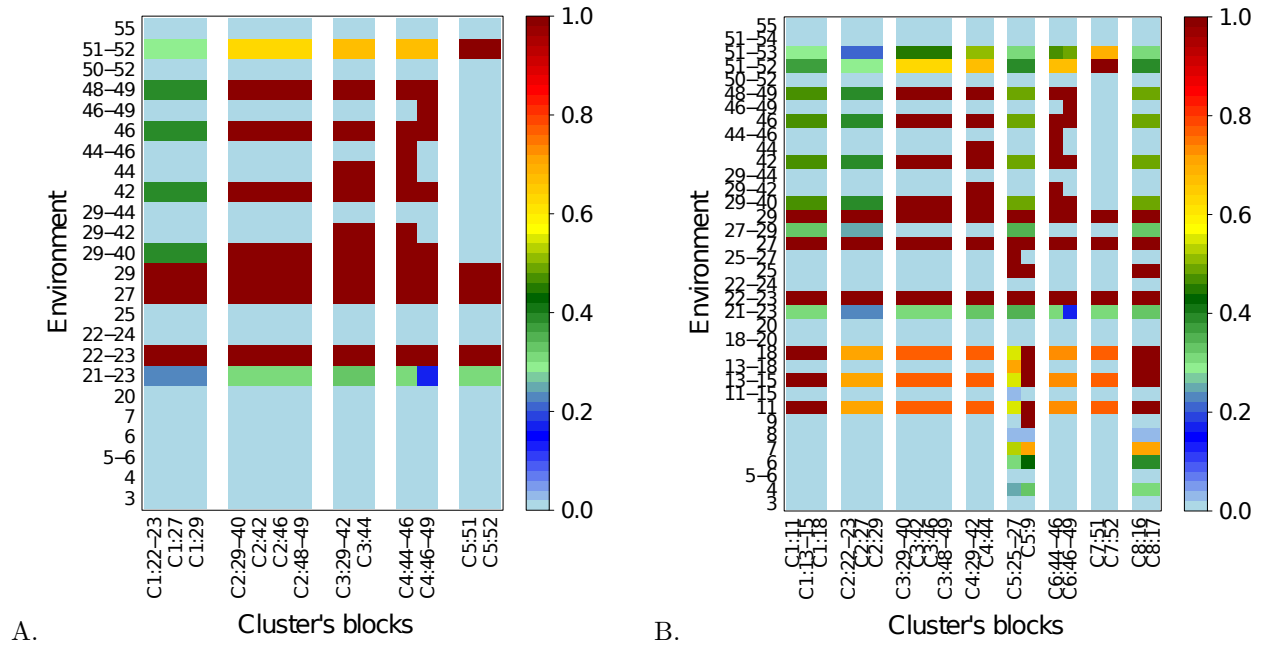

Figure 2: **Protein A-B domain: matrices computed for  $d = 0$  and  $d \leq 1$ .** BIS analysis realized on the dataset of 452 sequences. Clustered correlated distribution score matrices for  $d = 0$  (**A**) and  $d \leq 1$  (**B**), where symmetric and environmental scores used for selecting clusters are  $\geq 0$ . Notice that Fig. 4A is made of clusters of this matrix with scores = 1.
